# Supplementary material for: Identification of key genes in osteosarcoma by meta-analysis of gene expression microarray
Source: PubMed Central journal article supplement — Mol Med Rep. 2019 Jul 31;20(4):3075–84. doi: 10.3892/mmr.2019.10543 (PMC6755242; doi:10.3892/mmr.2019.10543), 2019-07-31
Supplement: Supplementary_Data.pdf [file Supplementary_Data.pdf]

Figure S1. Principal component analysis plot of molecular signatures of OS and control samples. The colors indicate the sample groups; red indicates BM-MSCs (controls) and blue indicates the OS samples. Shapes indicate clustering of the samples. PC1, principal component cluster 1; PC2, principal component cluster 2; OS, osteosarcoma; NA, not available; BM-MSCs, bone marrow mesenchymal stromal cells.

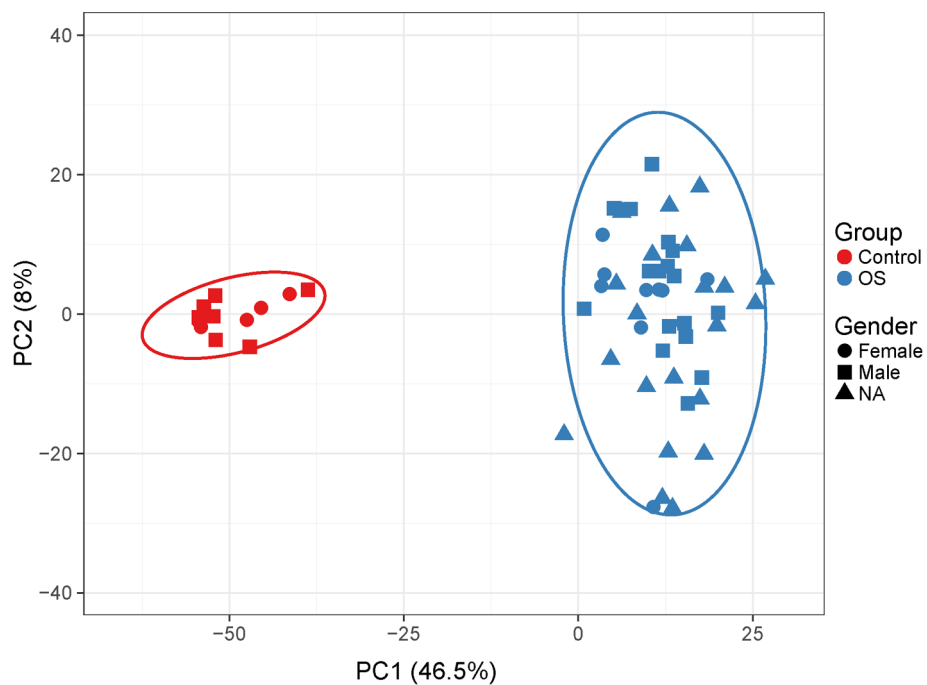

Figure S2. Analysis of network topology for various soft-thresholding powers. The left-hand panel shows the scale-free fit index (y-axis) as a function of the soft thresholding power (x-axis). The right-hand panel shows the mean connectivity (degree, y-axis) as a function of the soft thresholding power (x-axis). Power 12 is the lowest power for the fit index reaching a high value close to 0.9 but with reasonable connectivity.

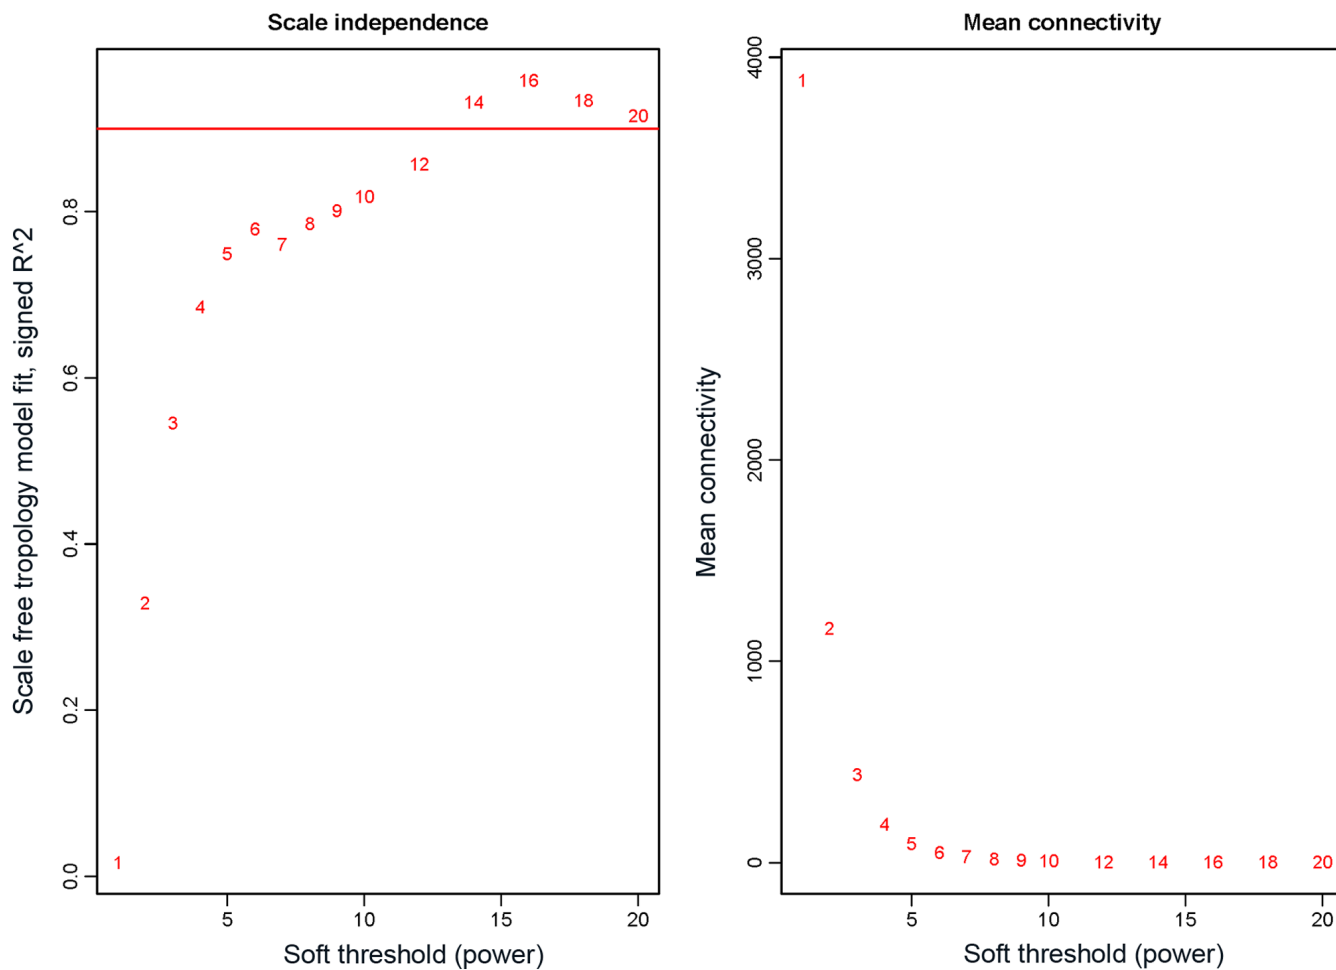

Figure S3. Tumor-infiltrating immune cell profiles in osteosarcoma. NK, natural killer; RMSE, root-mean-squared error.

| Input Sample | B cells naive | B cells memory | Plasma cells | T cells CD8 | T cells CD4 naive | T cells CD4 memory resting | T cells CD4 memory activated | T cells follicular helper | T cells regulatory (Treg) | T cells gamma delta | NK cells resting | NK cells activated | Monocyte M0 | Macrophage M1 | Macrophage M2 | Dendritic cell resting | Dendritic cell activated | Mast cell resting | Mast cell activated | Eosinophil | Neutrophil | Value | Pearson Correlation | RMSE  |       |       |
|--------------|---------------|----------------|--------------|-------------|-------------------|----------------------------|------------------------------|---------------------------|---------------------------|---------------------|------------------|--------------------|-------------|---------------|---------------|------------------------|--------------------------|-------------------|---------------------|------------|------------|-------|---------------------|-------|-------|-------|
| GSM2311314   | 0.005         | 0.045          | 0.027        | 0           | 0.029             | 0.109                      | 0                            | 0.012                     | 0.003                     | 0                   | 0.038            | 0                  | 0.027       | 0.224         | 0.04          | 0                      | 0                        | 0.038             | 0                   | 0.013      | 0.003      | 0.000 | 0.636               | 0.786 |       |       |
| GSM2311315   | 0             | 0.035          | 0.003        | 0           | 0                 | 0.077                      | 0.012                        | 0.003                     | 0                         | 0.031               | 0                | 0.011              | 0           | 0.142         | 0.046         | 0.018                  | 0                        | 0.14              | 0                   | 0.009      | 0          | 0.000 | 0.580               | 0.821 |       |       |
| GSM2311316   | 0             | 0.017          | 0.038        | 0           | 0.024             | 0.081                      | 0                            | 0.012                     | 0                         | 0.104               | 0                | 0.059              | 0           | 0.219         | 0.09          | 0.213                  | 0                        | 0.032             | 0.021               | 0.033      | 0          | 0.000 | 0.486               | 0.873 |       |       |
| GSM2311317   | 0.032         | 0.156          | 0.076        | 0           | 0.08              | 0.199                      | 0.012                        | 0.064                     | 0                         | 0.075               | 0                | 0.001              | 0           | 0.055         | 0.06          | 0.124                  | 0                        | 0.022             | 0.036               | 0          | 0.007      | 0.000 | 0.603               | 0.814 |       |       |
| GSM2311318   | 0             | 0.013          | 0            | 0           | 0                 | 0.047                      | 0                            | 0.04                      | 0                         | 0.024               | 0                | 0.015              | 0           | 0.32          | 0.028         | 0                      | 0.026                    | 0                 | 0.026               | 0          | 0          | 0.009 | 0.000               | 0.687 | 0.737 |       |
| GSM2311319   | 0             | 0.029          | 0            | 0.016       | 0                 | 0.163                      | 0.01                         | 0                         | 0                         | 0.009               | 0                | 0                  | 0           | 0.106         | 0.05          | 0.049                  | 0.053                    | 0                 | 0.026               | 0.035      | 0.006      | 0.000 | 0.497               | 0.868 |       |       |
| GSM2311340   | 0             | 0.095          | 0.102        | 0           | 0                 | 0.194                      | 0                            | 0                         | 0                         | 0.041               | 0.012            | 0                  | 0           | 0             | 0.057         | 0.215                  | 0                        | 0.009             | 0.201               | 0          | 0          | 0.015 | 0.002               | 0.343 | 0.941 |       |
| GSM2311341   | 0             | 0.032          | 0.021        | 0.235       | 0                 | 0                          | 0.014                        | 0.041                     | 0                         | 0.18                | 0                | 0.083              | 0           | 0             | 0.062         | 0.268                  | 0                        | 0                 | 0.013               | 0.015      | 0.035      | 0.012 | 0.003               | 0.328 | 0.960 |       |
| GSM2311342   | 0             | 0.105          | 0.067        | 0           | 0.044             | 0.141                      | 0.02                         | 0                         | 0                         | 0.083               | 0                | 0.03               | 0           | 0.1           | 0.058         | 0.241                  | 0                        | 0                 | 0.112               | 0          | 0          | 0     | 0.001               | 0.396 | 0.917 |       |
| GSM2311343   | 0.008         | 0              | 0.001        | 0.015       | 0.016             | 0                          | 0.099                        | 0                         | 0                         | 0.022               | 0                | 0.016              | 0           | 0.030         | 0.014         | 0.118                  | 0                        | 0                 | 0.001               | 0.029      | 0.014      | 0     | 0                   | 0.000 | 0.717 | 0.709 |
| GSM2311344   | 0.001         | 0              | 0.001        | 0           | 0.083             | 0.136                      | 0                            | 0                         | 0                         | 0.014               | 0.015            | 0                  | 0           | 0.030         | 0.014         | 0.162                  | 0.054                    | 0.014             | 0.026               | 0.042      | 0          | 0.015 | 0.000               | 0.535 | 0.845 |       |
| GSM2311345   | 0.006         | 0.015          | 0.138        | 0.063       | 0                 | 0.103                      | 0.008                        | 0.016                     | 0                         | 0.092               | 0                | 0.028              | 0           | 0.084         | 0.099         | 0.117                  | 0.007                    | 0                 | 0.041               | 0          | 0.011      | 0.006 | 0.000               | 0.636 | 0.797 |       |
| GSM2311346   | 0             | 0.009          | 0.019        | 0           | 0.02              | 0.045                      | 0.001                        | 0                         | 0.006                     | 0.052               | 0                | 0.046              | 0           | 0.332         | 0.082         | 0.117                  | 0                        | 0                 | 0.068               | 0          | 0.016      | 0.024 | 0.001               | 0.370 | 0.917 |       |
| GSM2311347   | 0             | 0.045          | 0.009        | 0.127       | 0                 | 0                          | 0.016                        | 0.05                      | 0                         | 0.178               | 0                | 0.022              | 0           | 0.329         | 0.069         | 0.119                  | 0.001                    | 0                 | 0                   | 0.026      | 0          | 0     | 0.000               | 0.528 | 0.851 |       |
| GSM2311348   | 0             | 0.017          | 0.001        | 0.139       | 0                 | 0.017                      | 0.017                        | 0.053                     | 0                         | 0.144               | 0                | 0.051              | 0           | 0.097         | 0.104         | 0.148                  | 0                        | 0                 | 0.059               | 0          | 0.006      | 0.000 | 0.583               | 0.819 |       |       |
| GSM2311349   | 0             | 0.024          | 0.051        | 0.031       | 0.015             | 0.013                      | 0.057                        | 0.017                     | 0                         | 0.069               | 0                | 0.031              | 0           | 0.235         | 0.087         | 0.148                  | 0                        | 0.017             | 0                   | 0.059      | 0.001      | 0.006 | 0.000               | 0.695 | 0.746 |       |
| GSM2311350   | 0             | 0.011          | 0.000        | 0           | 0                 | 0.026                      | 0                            | 0.06                      | 0                         | 0.014               | 0.006            | 0                  | 0           | 0.356         | 0.021         | 0.117                  | 0                        | 0                 | 0.034               | 0          | 0          | 0.013 | 0.000               | 0.504 | 0.866 |       |
| GSM2311351   | 0.019         | 0              | 0            | 0           | 0.003             | 0.085                      | 0                            | 0                         | 0                         | 0.026               | 0.006            | 0                  | 0.006       | 0.299         | 0.029         | 0.066                  | 0                        | 0                 | 0.049               | 0          | 0          | 0.022 | 0.000               | 0.685 | 0.729 |       |
| GSM2311352   | 0.012         | 0              | 0            | 0           | 0.056             | 0.093                      | 0                            | 0                         | 0                         | 0.029               | 0                | 0.055              | 0           | 0.303         | 0.022         | 0.117                  | 0.027                    | 0                 | 0.061               | 0.101      | 0          | 0.006 | 0.000               | 0.608 | 0.801 |       |
| GSM2311353   | 0.002         | 0              | 0.026        | 0.040       | 0.023             | 0.023                      | 0.022                        | 0.01                      | 0                         | 0.061               | 0                | 0.004              | 0           | 0.179         | 0.04          | 0.117                  | 0.001                    | 0                 | 0.008               | 0.019      | 0          | 0.010 | 0.000               | 0.703 | 0.733 |       |
| GSM2311354   | 0.005         | 0              | 0            | 0.011       | 0.135             | 0.209                      | 0                            | 0                         | 0.043                     | 0                   | 0.043            | 0                  | 0.014       | 0.104         | 0.014         | 0                      | 0                        | 0.069             | 0                   | 0          | 0          | 0.000 | 0.683               | 0.747 |       |       |
| GSM231114    | 0             | 0.028          | 0.115        | 0.225       | 0                 | 0.06                       | 0.051                        | 0.014                     | 0.098                     | 0                   | 0.088            | 0                  | 0.088       | 0.059         | 0.052         | 0.15                   | 0                        | 0                 | 0.056               | 0          | 0.010      | 0.000 | 0.597               | 0.810 |       |       |
| GSM231115    | 0             | 0.126          | 0.067        | 0.003       | 0                 | 0.095                      | 0.02                         | 0.043                     | 0.038                     | 0                   | 0                | 0                  | 0           | 0.22          | 0.088         | 0.119                  | 0                        | 0                 | 0.053               | 0.008      | 0.023      | 0.001 | 0.400               | 0.918 |       |       |
| GSM231116    | 0             | 0.042          | 0            | 0           | 0                 | 0.097                      | 0                            | 0.077                     | 0                         | 0.04                | 0                | 0.015              | 0           | 0.227         | 0.061         | 0.117                  | 0.011                    | 0                 | 0.038               | 0.043      | 0          | 0     | 0.000               | 0.652 | 0.770 |       |
| GSM231117    | 0.03          | 0              | 0.003        | 0           | 0                 | 0.178                      | 0.011                        | 0.007                     | 0                         | 0.049               | 0                | 0.058              | 0.014       | 0             | 0.073         | 0.007                  | 0.006                    | 0                 | 0.062               | 0.002      | 0.008      | 0.009 | 0.263               | 0.984 |       |       |
| GSM231118    | 0.021         | 0.027          | 0            | 0           | 0.015             | 0.047                      | 0.033                        | 0.037                     | 0                         | 0.045               | 0                | 0                  | 0           | 0.044         | 0.042         | 0.117                  | 0.011                    | 0                 | 0.046               | 0          | 0.029      | 0.000 | 0.706               | 0.733 |       |       |
| GSM231119    | 0             | 0.043          | 0.015        | 0           | 0.061             | 0.063                      | 0.22                         | 0                         | 0                         | 0.022               | 0.027            | 0                  | 0           | 0.249         | 0.023         | 0.177                  | 0                        | 0                 | 0.1                 | 0          | 0          | 0.000 | 0.583               | 0.826 |       |       |
| GSM231120    | 0             | 0.025          | 0            | 0           | 0                 | 0.094                      | 0                            | 0.004                     | 0                         | 0.008               | 0                | 0.023              | 0           | 0.23          | 0.038         | 0.117                  | 0                        | 0                 | 0.07                | 0.02       | 0          | 0.01  | 0.000               | 0.697 | 0.738 |       |
| GSM231121    | 0.012         | 0              | 0.004        | 0           | 0.037             | 0.105                      | 0.053                        | 0                         | 0                         | 0.003               | 0.006            | 0                  | 0           | 0.313         | 0.025         | 0.117                  | 0.01                     | 0                 | 0.045               | 0          | 0          | 0.000 | 0.705               | 0.729 |       |       |
| GSM231122    | 0             | 0.052          | 0            | 0           | 0.062             | 0.163                      | 0                            | 0                         | 0                         | 0                   | 0.016            | 0                  | 0           | 0.249         | 0.035         | 0.117                  | 0.016                    | 0.001             | 0                   | 0.039      | 0.001      | 0     | 0.000               | 0.648 | 0.777 |       |
| GSM231123    | 0             | 0.021          | 0            | 0           | 0                 | 0.028                      | 0                            | 0.017                     | 0.002                     | 0                   | 0                | 0.012              | 0           | 0.111         | 0.027         | 0.117                  | 0                        | 0                 | 0.033               | 0.004      | 0          | 0.004 | 0.000               | 0.794 | 0.625 |       |
| GSM231124    | 0             | 0.02           | 0.008        | 0           | 0.02              | 0.072                      | 0.041                        | 0                         | 0                         | 0.06                | 0                | 0.001              | 0           | 0.111         | 0.052         | 0.117                  | 0                        | 0                 | 0.056               | 0          | 0          | 0.003 | 0.000               | 0.692 | 0.744 |       |
| GSM231125    | 0             | 0.088          | 0.219        | 0.076       | 0                 | 0.12                       | 0.014                        | 0                         | 0.043                     | 0                   | 0                | 0                  | 0           | 0.11          | 0.084         | 0.156                  | 0.006                    | 0                 | 0.024               | 0          | 0          | 0     | 0.000               | 0.622 | 0.767 |       |
| GSM231126    | 0             | 0.015          | 0            | 0           | 0.122             | 0.015                      | 0.004                        | 0.01                      | 0.081                     | 0                   | 0.068            | 0                  | 0           | 0.101         | 0.015         | 0.117                  | 0                        | 0                 | 0.125               | 0          | 0          | 0.000 | 0.537               | 0.843 |       |       |
| GSM231127    | 0             | 0.045          | 0.016        | 0.053       | 0                 | 0.038                      | 0                            | 0                         | 0.024                     | 0                   | 0                | 0.015              | 0           | 0.129         | 0.046         | 0.117                  | 0.013                    | 0                 | 0.089               | 0          | 0          | 0.000 | 0.459               | 0.890 |       |       |
| GSM231128    | 0.038         | 0.012          | 0            | 0           | 0.015             | 0.145                      | 0                            | 0                         | 0.019                     | 0                   | 0                | 0                  | 0           | 0.212         | 0.019         | 0.117                  | 0.012                    | 0                 | 0.134               | 0.006      | 0.04       | 0.000 | 0.646               | 0.777 |       |       |
| GSM231129    | 0.057         | 0              | 0.006        | 0.008       | 0                 | 0.006                      | 0.011                        | 0.005                     | 0.073                     | 0.014               | 0                | 0                  | 0           | 0.001         | 0.01          | 0.117                  | 0                        | 0                 | 0.048               | 0          | 0          | 0.000 | 0.580               | 0.814 |       |       |
| GSM231130    | 0             | 0.031          | 0            | 0           | 0.009             | 0.036                      | 0.027                        | 0                         | 0                         | 0.025               | 0.008            | 0                  | 0.003       | 0.263         | 0.021         | 0.117                  | 0                        | 0                 | 0.025               | 0          | 0          | 0.013 | 0.000               | 0.686 | 0.737 |       |
| GSM231131    | 0             | 0.023          | 0            | 0           | 0                 | 0.092                      | 0.003                        | 0.003                     | 0                         | 0.006               | 0.01             | 0                  | 0           | 0.01          | 0.018         | 0.117                  | 0                        | 0.009             | 0.015               | 0.004      | 0          | 0.010 | 0.000               | 0.775 | 0.652 |       |
| GSM231132    | 0.013         | 0.015          | 0.006        | 0           | 0.025             | 0.143                      | 0.015                        | 0                         | 0                         | 0.009               | 0                | 0.021              | 0           | 0.168         | 0.035         | 0.117                  | 0                        | 0                 | 0.01                | 0          | 0          | 0     | 0.000               | 0.671 | 0.756 |       |
| GSM231133    | 0             | 0.085          | 0            | 0           | 0                 | 0.154                      | 0                            | 0.006                     | 0                         | 0.028               | 0                | 0.044              | 0           | 0.237         | 0.041         | 0.117                  | 0                        | 0                 | 0.02                | 0.021      | 0          | 0.016 | 0.000               | 0.641 | 0.784 |       |
| GSM231134    | 0.02          | 0              | 0            | 0           | 0.008             | 0.164                      | 0                            | 0                         | 0.027                     | 0                   | 0.028            | 0                  | 0           | 0.15          | 0.037         | 0.117                  | 0                        | 0                 | 0.065               | 0.007      | 0          | 0     | 0.000               | 0.585 | 0.817 |       |
| GSM231135    | 0             | 0.113          | 0.006        | 0           | 0                 | 0.079                      | 0                            | 0.003                     | 0.021                     | 0.042               | 0                | 0.015              | 0           | 0.001         | 0.015         | 0.117                  | 0                        | 0                 | 0.043               | 0          | 0          | 0.000 | 0.532               | 0.847 |       |       |
| GSM231136    | 0.037         | 0.015          | 0            | 0           | 0.161             | 0.033                      | 0                            | 0                         | 0.04                      | 0                   | 0.025            | 0                  | 0           | 0.002         | 0.022         | 0.117                  | 0                        | 0                 | 0.046               | 0.029      | 0.019      | 0.039 | 0.002               | 0.338 | 0.947 |       |
| GSM231137    | 0             | 0.047          | 0.007        | 0           | 0.019             | 0.013                      | 0                            | 0.013                     | 0                         | 0.06                | 0                | 0.006              | 0           | 0.08          | 0.026         | 0.117                  | 0                        | 0                 | 0.046               | 0.029      | 0.019      | 0.039 | 0.002               | 0.396 | 0.904 |       |
| GSM231138    | 0             | 0.11           | 0            | 0           | 0                 | 0.063                      | 0.053                        | 0.003                     | 0                         | 0.006               | 0                | 0.042              | 0           | 0.17          | 0.04          | 0.249                  | 0                        | 0                 | 0.009               | 0.052      | 0          | 0     | 0.012               | 0.114 | 0.919 |       |
| GSM231139    | 0             | 0.07           | 0.006        | 0           | 0                 | 0.043                      | 0                            | 0.054                     | 0.007                     | 0.028               | 0                | 0                  | 0           | 0.131         | 0.01          | 0.117                  | 0                        | 0.01              | 0                   | 0          | 0          | 0.000 | 0.706               | 0.729 |       |       |
| GSM231140    | 0             | 0.055          | 0.007        | 0           | 0.022             | 0.027                      | 0.031                        | 0                         | 0                         | 0.001               | 0.052            | 0.025              | 0           | 0.001         | 0.011         | 0.204                  | 0                        | 0                 | 0.035               | 0.002      | 0.075      | 0.000 | 0.753               | 0.684 |       |       |
| GSM235019    | 0             | 0              | 0.104        | 0.009       | 0.023             | 0.21                       | 0                            | 0                         | 0.163                     | 0                   | 0.087            | 0.054              | 0           | 0.167         | 0.027         | 0.077                  | 0.077                    | 0                 | 0.069               | 0          | 0          | 0.000 | 0.111               | 0.062 | 1.067 |       |
| GSM235020    | 0.016         | 0              | 0.091        | 0.240       | 0                 | 0.112                      | 0                            | 0.007                     | 0.036                     | 0.014               | 0                | 0.135              | 0           | 0.184         | 0.034         | 0.041                  | 0.033                    | 0                 | 0.019               | 0          | 0.044      | 0.000 | 0.153               | 0.091 | 1.073 |       |
| GSM235021    | 0.23          | 0              | 0            | 0           | 0.016             | 0                          | 0                            | 0.006                     | 0.045                     | 0                   | 0                | 0                  | 0           | 0.113         | 0.016         | 0.122                  | 0.063                    | 0                 | 0.093               | 0          | 0          | 0.000 | 0.509               | 0.022 | 1.103 |       |
| GSM84605     | 0.092         | 0.096          | 0.099        | 0           | 0                 | 0.112                      | 0                            | 0                         | 0                         | 0                   | 0.111            | 0.009              | 0.069       | 0.128         | 0.024         | 0                      | 0                        | 0                 | 0.039               | 0          | 0          | 0     | 0.000               | 0.104 | 1.119 | 1.050 |
| GSM84606     | 0.293         | 0              | 0            | 0           | 0                 | 0.112                      | 0                            | 0                         | 0.041                     | 0.016               | 0.062            | 0                  | 0           | 0.095         | 0.061         | 0                      | 0                        | 0                 | 0.109               | 0          | 0          | 0.023 | 0.026               | 0.020 | 1.091 |       |
| GSM84607     | 0.093         | 0.018          | 0.013        | 0           | 0.103             | 0.11                       | 0                            | 0                         | 0                         | 0.006               | 0                |                    |             |               |               |                        |                          |                   |                     |            |            |       |                     |       |       |       |

Table SI. Characteristics of included individuals and download links.

| Group | GSM_No     | GEO_accession | Gender | Age, years | Histotype      | Response to preoperative chemotherapy | Supplementary_file                                                                            |
|-------|------------|---------------|--------|------------|----------------|---------------------------------------|-----------------------------------------------------------------------------------------------|
| OS    | GSM2331334 | GSE87437      | NA     | 16         | Osteoblastic   | Poor                                  | ftp://ftp.ncbi.nlm.nih.gov/geo/samples/GSM2331334/GSM2331334_supp1/GSM2331334_itcc0071.cel.gz |
| OS    | GSM2331335 | GSE87437      | NA     | 17         | Osteoblastic   | Poor                                  | ftp://ftp.ncbi.nlm.nih.gov/geo/samples/GSM2331335/GSM2331335_supp1/GSM2331335_itcc0074.cel.gz |
| OS    | GSM2331336 | GSE87437      | NA     | 15         | Osteoblastic   | Poor                                  | ftp://ftp.ncbi.nlm.nih.gov/geo/samples/GSM2331336/GSM2331336_supp1/GSM2331336_itcc0076.cel.gz |
| OS    | GSM2331337 | GSE87437      | NA     | 14         | Osteoblastic   | Poor                                  | ftp://ftp.ncbi.nlm.nih.gov/geo/samples/GSM2331337/GSM2331337_supp1/GSM2331337_itcc0077.cel.gz |
| OS    | GSM2331338 | GSE87437      | NA     | 12         | Osteoblastic   | Good                                  | ftp://ftp.ncbi.nlm.nih.gov/geo/samples/GSM2331338/GSM2331338_itcc0078.cel.gz                  |
| OS    | GSM2331339 | GSE87437      | NA     | 15         | Osteoblastic   | Good                                  | ftp://ftp.ncbi.nlm.nih.gov/geo/samples/GSM2331339/GSM2331339_itcc0079.cel.gz                  |
| OS    | GSM2331340 | GSE87437      | NA     | 9          | Osteoblastic   | Good                                  | ftp://ftp.ncbi.nlm.nih.gov/geo/samples/GSM2331340/GSM2331340_itcc0081.cel.gz                  |
| OS    | GSM2331341 | GSE87437      | NA     | 9          | Osteoblastic   | Poor                                  | ftp://ftp.ncbi.nlm.nih.gov/geo/samples/GSM2331341/GSM2331341_itcc0085.cel.gz                  |
| OS    | GSM2331342 | GSE87437      | NA     | 14         | Osteoblastic   | Good                                  | ftp://ftp.ncbi.nlm.nih.gov/geo/samples/GSM2331342/GSM2331342_itcc0087.cel.gz                  |
| OS    | GSM2331343 | GSE87437      | NA     | 13         | Osteoblastic   | Poor                                  | ftp://ftp.ncbi.nlm.nih.gov/geo/samples/GSM2331343/GSM2331343_itcc0090.cel.gz                  |
| OS    | GSM2331344 | GSE87437      | NA     | 8          | Osteoblastic   | Poor                                  | ftp://ftp.ncbi.nlm.nih.gov/geo/samples/GSM2331344/GSM2331344_itcc0091.cel.gz                  |
| OS    | GSM2331345 | GSE87437      | NA     | 5          | Osteoblastic   | Good                                  | ftp://ftp.ncbi.nlm.nih.gov/geo/samples/GSM2331345/GSM2331345_itcc0094.cel.gz                  |
| OS    | GSM2331346 | GSE87437      | NA     | 20         | Osteoblastic   | Good                                  | ftp://ftp.ncbi.nlm.nih.gov/geo/samples/GSM2331346/GSM2331346_itcc0099.cel.gz                  |
| OS    | GSM2331347 | GSE87437      | NA     | 22         | Osteoblastic   | Poor                                  | ftp://ftp.ncbi.nlm.nih.gov/geo/samples/GSM2331347/GSM2331347_itcc0486.cel.gz                  |
| OS    | GSM2331348 | GSE87437      | NA     | 19         | Fibroblastic   | Good                                  | ftp://ftp.ncbi.nlm.nih.gov/geo/samples/GSM2331348/GSM2331348_itcc0488.cel.gz                  |
| OS    | GSM2331349 | GSE87437      | NA     | 15         | Telangiectatic | Poor                                  | ftp://ftp.ncbi.nlm.nih.gov/geo/samples/GSM2331349/GSM2331349_itcc0493.cel.gz                  |
| OS    | GSM2331350 | GSE87437      | NA     | 18         | Osteoblastic   | Good                                  | ftp://ftp.ncbi.nlm.nih.gov/geo/samples/GSM2331350/GSM2331350_itcc0495.cel.gz                  |
| OS    | GSM2331351 | GSE87437      | NA     | 14         | Osteoblastic   | Good                                  | ftp://ftp.ncbi.nlm.nih.gov/geo/samples/GSM2331351/GSM2331351_itcc0499.cel.gz                  |
| OS    | GSM2331352 | GSE87437      | NA     | 11         | Osteoblastic   | Good                                  | ftp://ftp.ncbi.nlm.nih.gov/geo/samples/GSM2331352/GSM2331352_itcc0500.cel.gz                  |

Table SI. Continued.

| Group | GSM_No     | GEO_accession | Gender | Age, years | Histotype      | Response to preoperative chemotherapy | Supplementary_file                                                                           |
|-------|------------|---------------|--------|------------|----------------|---------------------------------------|----------------------------------------------------------------------------------------------|
| OS    | GSM2331353 | GSE87437      | NA     | 22         | Telangiectatic | Poor                                  | ftp://ftp.ncbi.nlm.nih.gov/geo/samples/GSM2331353/GSM2331353_supp/GSM2331353_itcc0503.cel.gz |
| OS    | GSM2331354 | GSE87437      | NA     | 15         | Osteoblastic   | Poor                                  | ftp://ftp.ncbi.nlm.nih.gov/geo/samples/GSM2331354/GSM2331354_supp/GSM2331354_itcc0505.cel.gz |
| OS    | GSM371114  | GSE14827      | Male   | 19         | Osteoblastic   | Good                                  | ftp://ftp.ncbi.nlm.nih.gov/geo/samples/GSM371114/GSM371114_supp/GSM371114.CEL.gz             |
| OS    | GSM371115  | GSE14827      | Female | 9          | Telangiectatic | Poor                                  | ftp://ftp.ncbi.nlm.nih.gov/geo/samples/GSM371115/GSM371115_supp/GSM371115.CEL.gz             |
| OS    | GSM371116  | GSE14827      | Female | 13         | Osteoblastic   | Poor                                  | ftp://ftp.ncbi.nlm.nih.gov/geo/samples/GSM371116/GSM371116_supp/GSM371116.CEL.gz             |
| OS    | GSM371117  | GSE14827      | Male   | 14         | Osteoblastic   | Poor                                  | ftp://ftp.ncbi.nlm.nih.gov/geo/samples/GSM371117/GSM371117_supp/GSM371117.CEL.gz             |
| OS    | GSM371118  | GSE14827      | Male   | 12         | Osteoblastic   | Poor                                  | ftp://ftp.ncbi.nlm.nih.gov/geo/samples/GSM371118/GSM371118_supp/GSM371118.CEL.gz             |
| OS    | GSM371119  | GSE14827      | Female | 14         | Osteoblastic   | Good                                  | ftp://ftp.ncbi.nlm.nih.gov/geo/samples/GSM371119/GSM371119_supp/GSM371119.CEL.gz             |
| OS    | GSM371120  | GSE14827      | Male   | 13         | Osteoblastic   | Good                                  | ftp://ftp.ncbi.nlm.nih.gov/geo/samples/GSM371120/GSM371120_supp/GSM371120.CEL.gz             |
| OS    | GSM371121  | GSE14827      | Male   | 19         | Osteoblastic   | Poor                                  | ftp://ftp.ncbi.nlm.nih.gov/geo/samples/GSM371121/GSM371121_supp/GSM371121.CEL.gz             |
| OS    | GSM371122  | GSE14827      | Female | 15         | Osteoblastic   | Good                                  | ftp://ftp.ncbi.nlm.nih.gov/geo/samples/GSM371122/GSM371122_supp/GSM371122.CEL.gz             |
| OS    | GSM371123  | GSE14827      | Female | 9          | Osteoblastic   | Good                                  | ftp://ftp.ncbi.nlm.nih.gov/geo/samples/GSM371123/GSM371123_supp/GSM371123.CEL.gz             |
| OS    | GSM371124  | GSE14827      | Male   | 19         | Osteoblastic   | Poor                                  | ftp://ftp.ncbi.nlm.nih.gov/geo/samples/GSM371124/GSM371124_supp/GSM371124.CEL.gz             |
| OS    | GSM371125  | GSE14827      | Female | 19         | Fibroblastic   | Good                                  | ftp://ftp.ncbi.nlm.nih.gov/geo/samples/GSM371125/GSM371125_supp/GSM371125.CEL.gz             |
| OS    | GSM371126  | GSE14827      | Male   | 18         | Osteoblastic   | Good                                  | ftp://ftp.ncbi.nlm.nih.gov/geo/samples/GSM371126/GSM371126_supp/GSM371126.CEL.gz             |
| OS    | GSM371127  | GSE14827      | Male   | 21         | Osteoblastic   | Poor                                  | ftp://ftp.ncbi.nlm.nih.gov/geo/samples/GSM371127/GSM371127_supp/GSM371127.CEL.gz             |
| OS    | GSM371128  | GSE14827      | Male   | 18         | Chondroblastic | Poor                                  | ftp://ftp.ncbi.nlm.nih.gov/geo/samples/GSM371128/GSM371128_supp/GSM371128.CEL.gz             |
| OS    | GSM371129  | GSE14827      | Male   | 14         | Chondroblastic | Poor                                  | ftp://ftp.ncbi.nlm.nih.gov/geo/samples/GSM371129/GSM371129_supp/GSM371129.CEL.gz             |
| OS    | GSM371130  | GSE14827      | Male   | 8          | Osteoblastic   | Good                                  | ftp://ftp.ncbi.nlm.nih.gov/geo/samples/GSM371130/GSM371130_supp/GSM371130.CEL.gz             |

Table SI. Continued.

| Group   | GSM_No    | GEO_accession | Gender | Age, years | Histotype      | Response to preoperative chemotherapy | Supplementary_file                                                                        |
|---------|-----------|---------------|--------|------------|----------------|---------------------------------------|-------------------------------------------------------------------------------------------|
| OS      | GSM371131 | GSE14827      | Male   | 24         | Osteoblastic   | Poor                                  | ftp://ftp.ncbi.nlm.nih.gov/geo/samples/GSM3711nnn/GSM371131/suppl/GSM371131.CEL.gz        |
| OS      | GSM371132 | GSE14827      | Female | 8          | Osteoblastic   | Poor                                  | ftp://ftp.ncbi.nlm.nih.gov/geo/samples/GSM3711nnn/GSM371132/suppl/GSM371132.CEL.gz        |
| OS      | GSM371133 | GSE14827      | Male   | 14         | Osteoblastic   | Poor                                  | ftp://ftp.ncbi.nlm.nih.gov/geo/samples/GSM3711nnn/GSM371133/suppl/GSM371133.CEL.gz        |
| OS      | GSM371134 | GSE14827      | Female | 38         | Osteoblastic   | Good                                  | ftp://ftp.ncbi.nlm.nih.gov/geo/samples/GSM3711nnn/GSM371134/suppl/GSM371134.CEL.gz        |
| OS      | GSM371135 | GSE14827      | Male   | 12         | Chondroblastic | Poor                                  | ftp://ftp.ncbi.nlm.nih.gov/geo/samples/GSM3711nnn/GSM371135/suppl/GSM371135.CEL.gz        |
| OS      | GSM371136 | GSE14827      | Female | 20         | Osteoblastic   | Poor                                  | ftp://ftp.ncbi.nlm.nih.gov/geo/samples/GSM3711nnn/GSM371136/suppl/GSM371136.CEL.gz        |
| OS      | GSM371137 | GSE14827      | Male   | 16         | Osteoblastic   | Poor                                  | ftp://ftp.ncbi.nlm.nih.gov/geo/samples/GSM3711nnn/GSM371137/suppl/GSM371137.CEL.gz        |
| OS      | GSM371138 | GSE14827      | Male   | 25         | Osteoblastic   | Good                                  | ftp://ftp.ncbi.nlm.nih.gov/geo/samples/GSM3711nnn/GSM371138/suppl/GSM371138.CEL.gz        |
| OS      | GSM371139 | GSE14827      | Female | 15         | Telangiectatic | Good                                  | ftp://ftp.ncbi.nlm.nih.gov/geo/samples/GSM3711nnn/GSM371139/suppl/GSM371139.CEL.gz        |
| OS      | GSM371140 | GSE14827      | Male   | 13         | Osteoblastic   | Poor                                  | ftp://ftp.ncbi.nlm.nih.gov/geo/samples/GSM3711nnn/GSM371140/suppl/GSM371140.CEL.gz        |
| Control | GSM250019 | GSE18043      | Male   | 67         | NA             | NA                                    | ftp://ftp.ncbi.nlm.nih.gov/geo/samples/GSM2500nnn/GSM250019/suppl/GSM250019.CEL.gz        |
| Control | GSM250020 | GSE18043      | Male   | 72         | NA             | NA                                    | ftp://ftp.ncbi.nlm.nih.gov/geo/samples/GSM2500nnn/GSM250020/suppl/GSM250020.CEL.gz        |
| Control | GSM250021 | GSE18043      | Female | 74         | NA             | NA                                    | ftp://ftp.ncbi.nlm.nih.gov/geo/samples/GSM2500nnn/GSM250021/suppl/GSM250021.CEL.gz        |
| Control | GSM894405 | GSE36474      | Female | 50         | NA             | NA                                    | ftp://ftp.ncbi.nlm.nih.gov/geo/samples/GSM8944nnn/GSM894405/suppl/GSM894405_HD1.CEL.gz    |
| Control | GSM894406 | GSE36474      | Female | 45         | NA             | NA                                    | ftp://ftp.ncbi.nlm.nih.gov/geo/samples/GSM8944nnn/GSM894406/suppl/GSM894406_HD2.CEL.gz    |
| Control | GSM894407 | GSE36474      | Male   | 58         | NA             | NA                                    | ftp://ftp.ncbi.nlm.nih.gov/geo/samples/GSM8944nnn/GSM894407/suppl/GSM894407_HD3.CEL.gz    |
| Control | GSM866168 | GSE35331      | Male   | 55         | NA             | NA                                    | ftp://ftp.ncbi.nlm.nih.gov/geo/samples/GSM8666nnn/GSM866168/suppl/GSM866168_HD-MS1.CEL.gz |
| Control | GSM866169 | GSE35331      | Male   | 53         | NA             | NA                                    | ftp://ftp.ncbi.nlm.nih.gov/geo/samples/GSM8666nnn/GSM866169/suppl/GSM866169_HD-MS2.CEL.gz |
| Control | GSM866170 | GSE35331      | Male   | 30         | NA             | NA                                    | ftp://ftp.ncbi.nlm.nih.gov/geo/samples/GSM8666nnn/GSM866170/suppl/GSM866170_HD-MS3.CEL.gz |

Table SI. Continued.

| Group   | GSM_No    | GEO_accession | Gender | Age, years | Histotype | Response to preoperative chemotherapy | Supplementary_file                                              |
|---------|-----------|---------------|--------|------------|-----------|---------------------------------------|-----------------------------------------------------------------|
| Control | GSM866171 | GSE35331      | Female | 68         | NA        | NA                                    | ftp://ftp.ncbi.nlm.nih.gov/geo/samples/GSM866171/HD-MSC4.CEL.gz |
| Control | GSM866172 | GSE35331      | Male   | 53         | NA        | NA                                    | ftp://ftp.ncbi.nlm.nih.gov/geo/samples/GSM866172/HD-MSC5.CEL.gz |
| Control | GSM866173 | GSE35331      | Female | 78         | NA        | NA                                    | ftp://ftp.ncbi.nlm.nih.gov/geo/samples/GSM866173/HD-MSC6.CEL.gz |

OS, osteosarcoma; NA, not available.

Table SII. Full list of DEGs identified in OS.

| Gene symbol    | log <sub>2</sub> FC | AveExp | t-score | P-value                | P <sup>adj</sup>       | B-value |
|----------------|---------------------|--------|---------|------------------------|------------------------|---------|
| <i>CPE</i>     | 6.01                | 9.77   | 13.95   | 1.40x10 <sup>-20</sup> | 8.46x10 <sup>-17</sup> | 36.52   |
| <i>MMP9</i>    | 5.96                | 10.45  | 9.99    | 1.95x10 <sup>-14</sup> | 2.20x10 <sup>-11</sup> | 22.57   |
| <i>SPARCL1</i> | 5.93                | 8.60   | 13.18   | 1.91x10 <sup>-19</sup> | 8.97x10 <sup>-16</sup> | 33.95   |
| <i>SI00A4</i>  | 5.92                | 10.98  | 23.45   | 4.21x10 <sup>-32</sup> | 2.97x10 <sup>-27</sup> | 62.16   |
| <i>CA2</i>     | 5.60                | 8.08   | 9.62    | 8.05x10 <sup>-14</sup> | 7.64x10 <sup>-11</sup> | 21.17   |
| <i>COL15A1</i> | 5.29                | 8.75   | 12.64   | 1.21x10 <sup>-18</sup> | 4.67x10 <sup>-15</sup> | 32.13   |
| <i>ACP5</i>    | 5.19                | 9.01   | 7.89    | 7.07x10 <sup>-11</sup> | 2.87x10 <sup>-08</sup> | 14.48   |
| <i>CIQC</i>    | 5.18                | 8.93   | 16.32   | 7.49x10 <sup>-24</sup> | 9.91x10 <sup>-20</sup> | 43.89   |
| <i>MMP13</i>   | 5.17                | 8.91   | 6.80    | 5.23x10 <sup>-09</sup> | 1.22x10 <sup>-06</sup> | 10.24   |
| <i>MRC1</i>    | 5.00                | 7.55   | 15.24   | 2.11x10 <sup>-22</sup> | 1.86x10 <sup>-18</sup> | 40.63   |
| <i>CIQA</i>    | 4.93                | 8.47   | 13.62   | 4.13x10 <sup>-20</sup> | 2.19x10 <sup>-16</sup> | 35.45   |
| <i>TYROBP</i>  | 4.92                | 9.02   | 16.60   | 3.21x10 <sup>-24</sup> | 5.25x10 <sup>-20</sup> | 44.72   |
| <i>IBSP</i>    | 4.76                | 9.05   | 5.79    | 2.69x10 <sup>-07</sup> | 3.79x10 <sup>-05</sup> | 6.37    |
| <i>OMD</i>     | 4.75                | 7.74   | 7.11    | 1.56x10 <sup>-09</sup> | 4.26x10 <sup>-07</sup> | 11.43   |
| <i>ASPEN</i>   | 4.65                | 7.80   | 5.86    | 2.01x10 <sup>-07</sup> | 2.96x10 <sup>-05</sup> | 6.65    |
| <i>CIQB</i>    | 4.64                | 7.96   | 13.63   | 4.04x10 <sup>-20</sup> | 2.19x10 <sup>-16</sup> | 35.48   |
| <i>CD14</i>    | 4.46                | 8.57   | 13.63   | 4.03x10 <sup>-20</sup> | 2.19x10 <sup>-16</sup> | 35.48   |
| <i>CPVL</i>    | 4.41                | 7.28   | 13.00   | 3.54x10 <sup>-19</sup> | 1.56x10 <sup>-15</sup> | 33.34   |
| <i>PANX3</i>   | 4.37                | 6.83   | 4.78    | 1.15x10 <sup>-05</sup> | 9.29x10 <sup>-04</sup> | 2.71    |
| <i>LAPTM5</i>  | 4.32                | 9.50   | 16.59   | 3.23x10 <sup>-24</sup> | 5.25x10 <sup>-20</sup> | 44.71   |
| <i>APCDD1</i>  | 4.28                | 8.10   | 8.41    | 9.08x10 <sup>-12</sup> | 4.80x10 <sup>-09</sup> | 16.50   |
| <i>ADGRF5</i>  | 4.25                | 7.53   | 15.59   | 7.09x10 <sup>-23</sup> | 8.34x10 <sup>-19</sup> | 41.70   |
| <i>GPR34</i>   | 4.24                | 7.10   | 13.96   | 1.35x10 <sup>-20</sup> | 8.40x10 <sup>-17</sup> | 36.55   |
| <i>DPT</i>     | 4.22                | 8.26   | 8.26    | 1.65x10 <sup>-11</sup> | 8.03x10 <sup>-09</sup> | 15.91   |
| <i>IFI27</i>   | 4.18                | 8.61   | 9.18    | 4.44x10 <sup>-13</sup> | 3.52x10 <sup>-10</sup> | 19.49   |
| <i>HLA-DRA</i> | 4.17                | 9.96   | 9.69    | 6.23x10 <sup>-14</sup> | 6.25x10 <sup>-11</sup> | 21.43   |
| <i>SPP1</i>    | 4.16                | 7.44   | 13.58   | 4.74x10 <sup>-20</sup> | 2.45x10 <sup>-16</sup> | 35.32   |
| <i>HEY1</i>    | 4.16                | 8.75   | 10.56   | 2.27x10 <sup>-15</sup> | 3.30x10 <sup>-12</sup> | 24.70   |
| <i>EGFL6</i>   | 4.12                | 7.23   | 5.30    | 1.69x10 <sup>-06</sup> | 1.82x10 <sup>-04</sup> | 4.58    |
| <i>OGN</i>     | 4.10                | 6.88   | 4.94    | 6.56x10 <sup>-06</sup> | 5.74x10 <sup>-04</sup> | 3.26    |
| <i>EVI2A</i>   | 4.10                | 8.54   | 14.95   | 5.24x10 <sup>-22</sup> | 3.97x10 <sup>-18</sup> | 39.74   |
| <i>SLC40A1</i> | 4.07                | 8.26   | 18.43   | 1.56x10 <sup>-26</sup> | 4.13x10 <sup>-22</sup> | 49.89   |
| <i>PRSS35</i>  | 4.06                | 7.37   | 7.09    | 1.69x10 <sup>-09</sup> | 4.58x10 <sup>-07</sup> | 11.35   |
| <i>CXCR4</i>   | 4.03                | 7.85   | 15.45   | 1.10x10 <sup>-22</sup> | 1.23x10 <sup>-18</sup> | 41.26   |
| <i>CD93</i>    | 4.02                | 8.06   | 16.86   | 1.45x10 <sup>-24</sup> | 3.08x10 <sup>-20</sup> | 45.48   |
| <i>CA3</i>     | 4.02                | 6.61   | 4.79    | 1.11x10 <sup>-05</sup> | 9.00x10 <sup>-04</sup> | 2.75    |
| <i>MS4A7</i>   | 3.96                | 7.33   | 13.29   | 1.29x10 <sup>-19</sup> | 6.45x10 <sup>-16</sup> | 34.34   |
| <i>HBB</i>     | 3.95                | 8.72   | 7.74    | 1.26x10 <sup>-10</sup> | 4.73x10 <sup>-08</sup> | 13.91   |
| <i>LPL</i>     | 3.90                | 8.14   | 8.98    | 9.59x10 <sup>-13</sup> | 6.86x10 <sup>-10</sup> | 18.73   |
| <i>RNASE6</i>  | 3.87                | 7.11   | 12.54   | 1.74x10 <sup>-18</sup> | 6.04x10 <sup>-15</sup> | 31.78   |
| <i>GIMAP2</i>  | 3.81                | 6.60   | 10.70   | 1.37x10 <sup>-15</sup> | 2.09x10 <sup>-12</sup> | 25.20   |
| <i>FCER1G</i>  | 3.80                | 7.87   | 10.54   | 2.51x10 <sup>-15</sup> | 3.53x10 <sup>-12</sup> | 24.60   |
| <i>MPEG1</i>   | 3.79                | 7.24   | 11.78   | 2.54x10 <sup>-17</sup> | 6.64x10 <sup>-14</sup> | 29.13   |
| <i>LYZ</i>     | 3.78                | 7.19   | 9.30    | 2.84x10 <sup>-13</sup> | 2.36x10 <sup>-10</sup> | 19.93   |
| <i>MAFB</i>    | 3.77                | 10.24  | 15.37   | 1.40x10 <sup>-22</sup> | 1.48x10 <sup>-18</sup> | 41.03   |
| <i>ANO5</i>    | 3.76                | 7.48   | 5.82    | 2.40x10 <sup>-07</sup> | 3.44x10 <sup>-05</sup> | 6.48    |
| <i>MXRA5</i>   | 3.75                | 10.54  | 9.86    | 3.24x10 <sup>-14</sup> | 3.45x10 <sup>-11</sup> | 22.07   |
| <i>CTSH</i>    | 3.72                | 8.69   | 12.79   | 7.11x10 <sup>-19</sup> | 2.91x10 <sup>-15</sup> | 32.66   |
| <i>SNX10</i>   | 3.68                | 7.24   | 10.02   | 1.77x10 <sup>-14</sup> | 2.00x10 <sup>-11</sup> | 22.67   |



Table SII. Continued.

| Gene symbol     | log <sub>2</sub> FC | AveExp | t-score | P-value                | P <sup>adj</sup>       | B-value |
|-----------------|---------------------|--------|---------|------------------------|------------------------|---------|
| <i>AQP1</i>     | 3.60                | 7.86   | 11.41   | 9.81x10 <sup>-17</sup> | 2.19x10 <sup>-13</sup> | 27.80   |
| <i>ZNF521</i>   | 3.59                | 6.64   | 8.09    | 3.24x10 <sup>-11</sup> | 1.45x10 <sup>-08</sup> | 15.25   |
| <i>FXVD6</i>    | 3.59                | 8.23   | 9.60    | 8.91x10 <sup>-14</sup> | 8.42x10 <sup>-11</sup> | 21.07   |
| <i>LRRN1</i>    | 3.58                | 6.26   | 6.45    | 2.07x10 <sup>-08</sup> | 4.06x10 <sup>-06</sup> | 8.88    |
| <i>MAMDC2</i>   | 3.58                | 7.53   | 7.04    | 2.05x10 <sup>-09</sup> | 5.46x10 <sup>-07</sup> | 11.16   |
| <i>PCDH17</i>   | 3.58                | 7.40   | 14.48   | 2.46x10 <sup>-21</sup> | 1.79x10 <sup>-17</sup> | 38.22   |
| <i>F13A1</i>    | 3.58                | 7.83   | 8.24    | 1.75x10 <sup>-11</sup> | 8.47x10 <sup>-09</sup> | 15.86   |
| <i>SP7</i>      | 3.55                | 7.85   | 5.74    | 3.27x10 <sup>-07</sup> | 4.47x10 <sup>-05</sup> | 6.18    |
| <i>IGDCC4</i>   | 3.54                | 7.21   | 10.33   | 5.47x10 <sup>-15</sup> | 6.94x10 <sup>-12</sup> | 23.83   |
| <i>MAGEA6</i>   | 3.52                | 6.16   | 4.49    | 3.25x10 <sup>-05</sup> | 2.26x10 <sup>-03</sup> | 1.71    |
| <i>GGTA1P</i>   | 3.47                | 7.17   | 11.30   | 1.45x10 <sup>-16</sup> | 2.93x10 <sup>-13</sup> | 27.41   |
| <i>CD163</i>    | 3.46                | 7.10   | 11.74   | 2.97x10 <sup>-17</sup> | 7.57x10 <sup>-14</sup> | 28.98   |
| <i>ITM2A</i>    | 3.42                | 7.42   | 9.17    | 4.61x10 <sup>-13</sup> | 3.61x10 <sup>-10</sup> | 19.45   |
| <i>FGL2</i>     | 3.41                | 7.07   | 9.77    | 4.61x10 <sup>-14</sup> | 4.79x10 <sup>-11</sup> | 21.72   |
| <i>FAT3</i>     | 3.41                | 6.65   | 7.54    | 2.87x10 <sup>-10</sup> | 9.48x10 <sup>-08</sup> | 13.10   |
| <i>VSIG4</i>    | 3.35                | 7.58   | 10.75   | 1.13x10 <sup>-15</sup> | 1.76x10 <sup>-12</sup> | 25.39   |
| <i>INSC</i>     | 3.35                | 6.77   | 5.67    | 4.15x10 <sup>-07</sup> | 5.51x10 <sup>-05</sup> | 5.95    |
| <i>CTSS</i>     | 3.35                | 7.39   | 10.82   | 8.58x10 <sup>-16</sup> | 1.44x10 <sup>-12</sup> | 25.66   |
| <i>EFNA1</i>    | 3.31                | 7.27   | 12.96   | 3.97x10 <sup>-19</sup> | 1.72x10 <sup>-15</sup> | 33.23   |
| <i>GIMAP6</i>   | 3.25                | 6.40   | 11.33   | 1.32x10 <sup>-16</sup> | 2.77x10 <sup>-13</sup> | 27.51   |
| <i>VAMP8</i>    | 3.24                | 8.12   | 9.39    | 1.98x10 <sup>-13</sup> | 1.70x10 <sup>-10</sup> | 20.29   |
| <i>CMPK2</i>    | 3.17                | 7.14   | 7.64    | 1.87x10 <sup>-10</sup> | 6.59x10 <sup>-08</sup> | 13.52   |
| <i>KDR</i>      | 3.16                | 7.83   | 15.31   | 1.71x10 <sup>-22</sup> | 1.65x10 <sup>-18</sup> | 40.84   |
| <i>CD24</i>     | 3.15                | 7.85   | 5.75    | 3.07x10 <sup>-07</sup> | 4.24x10 <sup>-05</sup> | 6.24    |
| <i>GUCY1A1</i>  | 3.14                | 6.75   | 11.14   | 2.64x10 <sup>-16</sup> | 4.99x10 <sup>-13</sup> | 26.82   |
| <i>MGP</i>      | 3.10                | 7.36   | 8.45    | 7.93x10 <sup>-12</sup> | 4.28x10 <sup>-09</sup> | 16.64   |
| <i>TMTC2</i>    | 3.09                | 6.84   | 7.66    | 1.76x10 <sup>-10</sup> | 6.26x10 <sup>-08</sup> | 13.58   |
| <i>HCLS1</i>    | 3.07                | 7.50   | 9.50    | 1.31x10 <sup>-13</sup> | 1.17x10 <sup>-10</sup> | 20.69   |
| <i>MEF2C</i>    | 3.07                | 8.26   | 11.78   | 2.61x10 <sup>-17</sup> | 6.75x10 <sup>-14</sup> | 29.11   |
| <i>A2M</i>      | 3.06                | 7.50   | 24.62   | 2.90x10 <sup>-33</sup> | 6.13x10 <sup>-28</sup> | 64.69   |
| <i>CXCL10</i>   | 3.05                | 7.27   | 5.67    | 4.19x10 <sup>-07</sup> | 5.56x10 <sup>-05</sup> | 5.94    |
| <i>ENPEP</i>    | 3.01                | 5.99   | 7.89    | 7.21x10 <sup>-11</sup> | 2.92x10 <sup>-08</sup> | 14.46   |
| <i>GMFG</i>     | 3.00                | 8.06   | 10.17   | 1.01x10 <sup>-14</sup> | 1.21x10 <sup>-11</sup> | 23.22   |
| <i>GUCY1B1</i>  | 2.99                | 7.22   | 12.57   | 1.56x10 <sup>-18</sup> | 5.61x10 <sup>-15</sup> | 31.88   |
| <i>CADM1</i>    | 2.99                | 7.02   | 11.08   | 3.29x10 <sup>-16</sup> | 6.01x10 <sup>-13</sup> | 26.61   |
| <i>SELENOP</i>  | 2.99                | 6.99   | 14.97   | 5.00x10 <sup>-22</sup> | 3.92x10 <sup>-18</sup> | 39.78   |
| <i>OLFML2B</i>  | 2.98                | 10.23  | 9.67    | 6.62x10 <sup>-14</sup> | 6.58x10 <sup>-11</sup> | 21.37   |
| <i>TM4SF18</i>  | 2.97                | 6.04   | 14.04   | 1.05x10 <sup>-20</sup> | 6.71x10 <sup>-17</sup> | 36.80   |
| <i>TNFSF13B</i> | 2.96                | 6.94   | 7.56    | 2.57x10 <sup>-10</sup> | 8.62x10 <sup>-08</sup> | 13.21   |
| <i>PMAIP1</i>   | 2.96                | 7.99   | 9.11    | 5.80x10 <sup>-13</sup> | 4.42x10 <sup>-10</sup> | 19.22   |
| <i>CSF1R</i>    | 2.95                | 8.60   | 9.38    | 2.03x10 <sup>-13</sup> | 1.74x10 <sup>-10</sup> | 20.26   |
| <i>CCR1</i>     | 2.95                | 7.24   | 9.07    | 6.83x10 <sup>-13</sup> | 5.09x10 <sup>-10</sup> | 19.06   |
| <i>PLVAP</i>    | 2.94                | 7.81   | 11.44   | 8.91x10 <sup>-17</sup> | 2.01x10 <sup>-13</sup> | 27.90   |
| <i>PLBD1</i>    | 2.93                | 7.54   | 8.72    | 2.69x10 <sup>-12</sup> | 1.69x10 <sup>-09</sup> | 17.71   |
| <i>EVI2B</i>    | 2.92                | 7.22   | 8.77    | 2.20x10 <sup>-12</sup> | 1.41x10 <sup>-09</sup> | 17.90   |
| <i>PDGFD</i>    | 2.91                | 7.45   | 7.96    | 5.33x10 <sup>-11</sup> | 2.27x10 <sup>-08</sup> | 14.76   |
| <i>SHTN1</i>    | 2.91                | 7.24   | 8.42    | 8.89x10 <sup>-12</sup> | 4.71x10 <sup>-09</sup> | 16.53   |
| <i>MNDA</i>     | 2.90                | 6.06   | 7.68    | 1.61x10 <sup>-10</sup> | 5.80x10 <sup>-08</sup> | 13.67   |
| <i>GPNMB</i>    | 2.90                | 8.45   | 8.45    | 7.93x10 <sup>-12</sup> | 4.28x10 <sup>-09</sup> | 16.64   |

Table SII. Continued.

| Gene symbol          | log <sub>2</sub> FC | AveExp | t-score | P-value                | P <sup>adj</sup>       | B-value |
|----------------------|---------------------|--------|---------|------------------------|------------------------|---------|
| <i>FTX</i>           | 2.90                | 7.97   | 10.70   | 1.35x10 <sup>-15</sup> | 2.07x10 <sup>-12</sup> | 25.22   |
| <i>TNFSF10</i>       | 2.89                | 6.42   | 6.99    | 2.50x10 <sup>-09</sup> | 6.46x10 <sup>-07</sup> | 10.96   |
| <i>CDH5</i>          | 2.85                | 6.78   | 11.36   | 1.20x10 <sup>-16</sup> | 2.56x10 <sup>-13</sup> | 27.60   |
| <i>GIMAP7</i>        | 2.83                | 6.06   | 6.73    | 7.04x10 <sup>-09</sup> | 1.60x10 <sup>-06</sup> | 9.94    |
| <i>CYXR1</i>         | 2.82                | 6.38   | 10.73   | 1.20x10 <sup>-15</sup> | 1.85x10 <sup>-12</sup> | 25.33   |
| <i>IL10RA</i>        | 2.80                | 6.81   | 8.01    | 4.34x10 <sup>-11</sup> | 1.88x10 <sup>-08</sup> | 14.96   |
| <i>ADAP2</i>         | 2.79                | 7.37   | 11.99   | 1.22x10 <sup>-17</sup> | 3.31x10 <sup>-14</sup> | 29.86   |
| <i>FCGR1B</i>        | 2.79                | 6.32   | 8.36    | 1.10x10 <sup>-11</sup> | 5.65x10 <sup>-09</sup> | 16.32   |
| <i>CD55</i>          | 2.76                | 7.71   | 7.60    | 2.27x10 <sup>-10</sup> | 7.74x10 <sup>-08</sup> | 13.33   |
| <i>MS4A4A</i>        | 2.75                | 6.58   | 9.65    | 7.22x10 <sup>-14</sup> | 7.02x10 <sup>-11</sup> | 21.28   |
| <i>CXCL14</i>        | 2.74                | 6.37   | 5.06    | 4.18x10 <sup>-06</sup> | 3.93x10 <sup>-04</sup> | 3.69    |
| <i>COL24A1</i>       | 2.73                | 6.59   | 5.95    | 1.42x10 <sup>-07</sup> | 2.19x10 <sup>-05</sup> | 7.00    |
| <i>AOC3</i>          | 2.72                | 6.48   | 7.35    | 5.93x10 <sup>-10</sup> | 1.81x10 <sup>-07</sup> | 12.38   |
| <i>PECAM1</i>        | 2.70                | 6.97   | 13.92   | 1.53x10 <sup>-20</sup> | 9.01x10 <sup>-17</sup> | 36.43   |
| <i>NPTX2</i>         | 2.69                | 6.65   | 4.80    | 1.09x10 <sup>-05</sup> | 8.90x10 <sup>-04</sup> | 2.76    |
| <i>GPR183</i>        | 2.68                | 7.01   | 6.72    | 7.28x10 <sup>-09</sup> | 1.64x10 <sup>-06</sup> | 9.91    |
| <i>RGS5</i>          | 2.68                | 6.90   | 9.95    | 2.31x10 <sup>-14</sup> | 2.56x10 <sup>-11</sup> | 22.41   |
| <i>IFI44L</i>        | 2.67                | 8.29   | 5.21    | 2.39x10 <sup>-06</sup> | 2.44x10 <sup>-04</sup> | 4.24    |
| <i>PTPRD</i>         | 2.66                | 6.08   | 11.33   | 1.34x10 <sup>-16</sup> | 2.78x10 <sup>-13</sup> | 27.49   |
| <i>PTH1R</i>         | 2.65                | 7.78   | 6.16    | 6.53x10 <sup>-08</sup> | 1.12x10 <sup>-05</sup> | 7.76    |
| <i>PDGFRL</i>        | 2.64                | 7.30   | 5.23    | 2.23x10 <sup>-06</sup> | 2.30x10 <sup>-04</sup> | 4.30    |
| <i>HERC5</i>         | 2.64                | 6.79   | 6.53    | 1.50x10 <sup>-08</sup> | 3.05x10 <sup>-06</sup> | 9.20    |
| <i>HLA-DMB</i>       | 2.61                | 8.15   | 8.88    | 1.46x10 <sup>-12</sup> | 9.82x10 <sup>-10</sup> | 18.31   |
| <i>PLA2G7</i>        | 2.60                | 6.12   | 7.15    | 1.32x10 <sup>-09</sup> | 3.66x10 <sup>-07</sup> | 11.59   |
| <i>MS4A6A</i>        | 2.60                | 7.03   | 10.76   | 1.08x10 <sup>-15</sup> | 1.74x10 <sup>-12</sup> | 25.43   |
| <i>CTSK</i>          | 2.59                | 11.42  | 5.46    | 9.21x10 <sup>-07</sup> | 1.09x10 <sup>-04</sup> | 5.17    |
| <i>EMCN</i>          | 2.57                | 6.40   | 8.55    | 5.21x10 <sup>-12</sup> | 3.02x10 <sup>-09</sup> | 17.05   |
| <i>DKFZP586I1420</i> | 2.57                | 7.34   | 9.55    | 1.07x10 <sup>-13</sup> | 9.79x10 <sup>-11</sup> | 20.89   |
| <i>COLEC12</i>       | 2.57                | 9.28   | 5.90    | 1.76x10 <sup>-07</sup> | 2.62x10 <sup>-05</sup> | 6.79    |
| <i>MX1</i>           | 2.56                | 7.98   | 5.64    | 4.72x10 <sup>-07</sup> | 6.17x10 <sup>-05</sup> | 5.82    |
| <i>HLA-DPA1</i>      | 2.56                | 8.72   | 6.28    | 4.10x10 <sup>-08</sup> | 7.41x10 <sup>-06</sup> | 8.21    |
| <i>RGS1</i>          | 2.55                | 5.55   | 8.57    | 4.86x10 <sup>-12</sup> | 2.85x10 <sup>-09</sup> | 17.12   |
| <i>LY75</i>          | 2.55                | 5.47   | 5.48    | 8.84x10 <sup>-07</sup> | 1.05x10 <sup>-04</sup> | 5.21    |
| <i>RASSF2</i>        | 2.54                | 7.17   | 9.65    | 7.23x10 <sup>-14</sup> | 7.02x10 <sup>-11</sup> | 21.28   |
| <i>RRAGD</i>         | 2.54                | 6.66   | 8.83    | 1.78x10 <sup>-12</sup> | 1.17x10 <sup>-09</sup> | 18.12   |
| <i>COL10A1</i>       | 2.51                | 7.77   | 4.04    | 1.54x10 <sup>-04</sup> | 8.64x10 <sup>-03</sup> | 0.21    |
| <i>ADAMDEC1</i>      | 2.50                | 5.55   | 4.68    | 1.64x10 <sup>-05</sup> | 1.27x10 <sup>-03</sup> | 2.37    |
| <i>UCP2</i>          | 2.50                | 7.50   | 9.33    | 2.49x10 <sup>-13</sup> | 2.09x10 <sup>-10</sup> | 20.06   |
| <i>H2BFS</i>         | 2.50                | 7.82   | 5.88    | 1.89x10 <sup>-07</sup> | 2.79x10 <sup>-05</sup> | 6.72    |
| <i>CCDC3</i>         | 2.48                | 8.78   | 6.95    | 2.92x10 <sup>-09</sup> | 7.39x10 <sup>-07</sup> | 10.81   |
| <i>PLPPR4</i>        | 2.47                | 6.08   | 5.46    | 9.22x10 <sup>-07</sup> | 1.09x10 <sup>-04</sup> | 5.17    |
| <i>TSPAN7</i>        | 2.46                | 6.74   | 5.65    | 4.57x10 <sup>-07</sup> | 5.99x10 <sup>-05</sup> | 5.85    |
| <i>RSAD2</i>         | 2.45                | 6.16   | 4.63    | 1.97x10 <sup>-05</sup> | 1.48x10 <sup>-03</sup> | 2.19    |
| <i>CCDC102B</i>      | 2.44                | 5.50   | 7.31    | 7.05x10 <sup>-10</sup> | 2.13x10 <sup>-07</sup> | 12.21   |
| <i>SAT1</i>          | 2.44                | 10.77  | 11.39   | 1.05x10 <sup>-16</sup> | 2.30x10 <sup>-13</sup> | 27.73   |
| <i>KCNJ2</i>         | 2.44                | 8.02   | 6.56    | 1.34x10 <sup>-08</sup> | 2.76x10 <sup>-06</sup> | 9.31    |
| <i>REEP1</i>         | 2.44                | 6.61   | 5.49    | 8.30x10 <sup>-07</sup> | 1.00x10 <sup>-04</sup> | 5.27    |
| <i>HEY2</i>          | 2.43                | 6.66   | 7.93    | 6.01x10 <sup>-11</sup> | 2.49x10 <sup>-08</sup> | 14.64   |
| <i>PELI1</i>         | 2.43                | 6.53   | 9.66    | 7.01x10 <sup>-14</sup> | 6.90x10 <sup>-11</sup> | 21.31   |

Table SII. Continued.

| Gene symbol         | log <sub>2</sub> FC | AveExp | t-score | P-value                | P <sup>adj</sup>       | B-value |
|---------------------|---------------------|--------|---------|------------------------|------------------------|---------|
| <i>GIMAP4</i>       | 2.43                | 7.06   | 8.78    | 2.10x10 <sup>-12</sup> | 1.36x10 <sup>-09</sup> | 17.95   |
| <i>PODXL</i>        | 2.43                | 8.09   | 9.71    | 5.89x10 <sup>-14</sup> | 5.97x10 <sup>-11</sup> | 21.48   |
| <i>SUCNR1</i>       | 2.43                | 6.19   | 5.68    | 4.02x10 <sup>-07</sup> | 5.37x10 <sup>-05</sup> | 5.98    |
| <i>CD36</i>         | 2.42                | 6.02   | 7.72    | 1.40x10 <sup>-10</sup> | 5.18x10 <sup>-08</sup> | 13.81   |
| <i>FAM129A</i>      | 2.42                | 7.92   | 5.96    | 1.38x10 <sup>-07</sup> | 2.13x10 <sup>-05</sup> | 7.02    |
| <i>CCL8</i>         | 2.41                | 6.29   | 5.09    | 3.76x10 <sup>-06</sup> | 3.61x10 <sup>-04</sup> | 3.80    |
| <i>TCIM</i>         | 2.41                | 4.77   | 6.62    | 1.08x10 <sup>-08</sup> | 2.33x10 <sup>-06</sup> | 9.52    |
| <i>LOC100996740</i> | 2.41                | 7.43   | 8.09    | 3.15x10 <sup>-11</sup> | 1.42x10 <sup>-08</sup> | 15.28   |
| <i>CLEC4A</i>       | 2.40                | 6.30   | 6.98    | 2.55x10 <sup>-09</sup> | 6.58x10 <sup>-07</sup> | 10.94   |
| <i>BLNK</i>         | 2.38                | 5.57   | 7.95    | 5.66x10 <sup>-11</sup> | 2.36x10 <sup>-08</sup> | 14.70   |
| <i>LRRN3</i>        | 2.38                | 7.46   | 5.83    | 2.29x10 <sup>-07</sup> | 3.31x10 <sup>-05</sup> | 6.53    |
| <i>GZMA</i>         | 2.36                | 5.63   | 4.08    | 1.36x10 <sup>-04</sup> | 7.74x10 <sup>-03</sup> | 0.34    |
| <i>BMP2</i>         | 2.36                | 6.84   | 5.47    | 8.90x10 <sup>-07</sup> | 1.06x10 <sup>-04</sup> | 5.20    |
| <i>CRISPLD1</i>     | 2.36                | 8.22   | 4.31    | 6.05x10 <sup>-05</sup> | 3.87x10 <sup>-03</sup> | 1.11    |
| <i>CLK1</i>         | 2.35                | 8.16   | 10.24   | 7.78x10 <sup>-15</sup> | 9.53x10 <sup>-12</sup> | 23.48   |
| <i>ISG15</i>        | 2.35                | 9.61   | 6.20    | 5.44x10 <sup>-08</sup> | 9.55x10 <sup>-06</sup> | 7.94    |
| <i>GPM6B</i>        | 2.34                | 6.80   | 7.42    | 4.51x10 <sup>-10</sup> | 1.42x10 <sup>-07</sup> | 12.65   |
| <i>DTX4</i>         | 2.33                | 7.67   | 6.20    | 5.47x10 <sup>-08</sup> | 9.60x10 <sup>-06</sup> | 7.93    |
| <i>FPR3</i>         | 2.32                | 6.12   | 10.04   | 1.64x10 <sup>-14</sup> | 1.88x10 <sup>-11</sup> | 22.74   |
| <i>APOC1</i>        | 2.31                | 8.82   | 7.52    | 3.11x10 <sup>-10</sup> | 1.02x10 <sup>-07</sup> | 13.02   |
| <i>LYN</i>          | 2.30                | 7.48   | 9.21    | 4.02x10 <sup>-13</sup> | 3.23x10 <sup>-10</sup> | 19.58   |
| <i>CTSC</i>         | 2.28                | 8.21   | 8.12    | 2.90x10 <sup>-11</sup> | 1.32x10 <sup>-08</sup> | 15.36   |
| <i>ARHGDI1</i>      | 2.28                | 8.19   | 12.46   | 2.31x10 <sup>-18</sup> | 7.52x10 <sup>-15</sup> | 31.50   |
| <i>COL18A1</i>      | 2.28                | 7.09   | 7.72    | 1.39x10 <sup>-10</sup> | 5.17x10 <sup>-08</sup> | 13.81   |
| <i>EPB41L3</i>      | 2.28                | 5.72   | 7.42    | 4.53x10 <sup>-10</sup> | 1.42x10 <sup>-07</sup> | 12.64   |
| <i>GHR</i>          | 2.28                | 7.39   | 6.24    | 4.75x10 <sup>-08</sup> | 8.47x10 <sup>-06</sup> | 8.07    |
| <i>CCDC152</i>      | 2.28                | 9.88   | 9.83    | 3.65x10 <sup>-14</sup> | 3.84x10 <sup>-11</sup> | 21.96   |
| <i>PLTP</i>         | 2.26                | 8.13   | 6.25    | 4.58x10 <sup>-08</sup> | 8.23x10 <sup>-06</sup> | 8.10    |
| <i>ZNF302</i>       | 2.26                | 7.42   | 8.90    | 1.35x10 <sup>-12</sup> | 9.27x10 <sup>-10</sup> | 18.39   |
| <i>RCAN2</i>        | 2.25                | 8.25   | 5.21    | 2.40x10 <sup>-06</sup> | 2.45x10 <sup>-04</sup> | 4.23    |
| <i>SHOX2</i>        | 2.24                | 6.70   | 9.66    | 7.04x10 <sup>-14</sup> | 6.90x10 <sup>-11</sup> | 21.31   |
| <i>PTPRC</i>        | 2.24                | 5.35   | 9.58    | 9.68x10 <sup>-14</sup> | 9.07x10 <sup>-11</sup> | 20.99   |
| <i>HIST1H1C</i>     | 2.24                | 8.18   | 4.84    | 9.15x10 <sup>-06</sup> | 7.69x10 <sup>-04</sup> | 2.93    |
| <i>NPNT</i>         | 2.22                | 5.79   | 9.83    | 3.69x10 <sup>-14</sup> | 3.87x10 <sup>-11</sup> | 21.94   |
| <i>LINC00597</i>    | 2.22                | 5.68   | 6.49    | 1.78x10 <sup>-08</sup> | 3.54x10 <sup>-06</sup> | 9.03    |
| <i>MTUS1</i>        | 2.22                | 6.13   | 9.01    | 8.53x10 <sup>-13</sup> | 6.14x10 <sup>-10</sup> | 18.84   |
| <i>HCK</i>          | 2.22                | 6.31   | 7.95    | 5.61x10 <sup>-11</sup> | 2.36x10 <sup>-08</sup> | 14.71   |
| <i>ABHD3</i>        | 2.21                | 7.62   | 10.78   | 1.01x10 <sup>-15</sup> | 1.65x10 <sup>-12</sup> | 25.50   |
| <i>THEMIS2</i>      | 2.21                | 6.41   | 8.86    | 1.58x10 <sup>-12</sup> | 1.06x10 <sup>-09</sup> | 18.23   |
| <i>C5AR1</i>        | 2.21                | 6.68   | 7.03    | 2.12x10 <sup>-09</sup> | 5.60x10 <sup>-07</sup> | 11.13   |
| <i>IFIT1</i>        | 2.20                | 8.28   | 4.59    | 2.32x10 <sup>-05</sup> | 1.69x10 <sup>-03</sup> | 2.04    |
| <i>RGS2</i>         | 2.19                | 9.41   | 5.17    | 2.82x10 <sup>-06</sup> | 2.81x10 <sup>-04</sup> | 4.08    |
| <i>CKB</i>          | 2.19                | 8.61   | 4.41    | 4.36x10 <sup>-05</sup> | 2.92x10 <sup>-03</sup> | 1.42    |
| <i>NCF2</i>         | 2.18                | 5.75   | 7.49    | 3.51x10 <sup>-10</sup> | 1.13x10 <sup>-07</sup> | 12.90   |
| <i>CCDC18-AS1</i>   | 2.18                | 8.21   | 8.69    | 3.09x10 <sup>-12</sup> | 1.91x10 <sup>-09</sup> | 17.57   |
| <i>C1orf162</i>     | 2.18                | 6.94   | 7.08    | 1.73x10 <sup>-09</sup> | 4.66x10 <sup>-07</sup> | 11.33   |
| <i>GOLGA8N</i>      | 2.18                | 8.64   | 8.62    | 3.99x10 <sup>-12</sup> | 2.39x10 <sup>-09</sup> | 17.32   |
| <i>CLEC2B</i>       | 2.16                | 6.59   | 8.55    | 5.32x10 <sup>-12</sup> | 3.07x10 <sup>-09</sup> | 17.03   |
| <i>IFITM1</i>       | 2.15                | 10.03  | 5.77    | 2.90x10 <sup>-07</sup> | 4.05x10 <sup>-05</sup> | 6.30    |

Table SII. Continued.

| Gene symbol      | log <sub>2</sub> FC | AveExp | t-score | P-value                | P <sup>adj</sup>       | B-value |
|------------------|---------------------|--------|---------|------------------------|------------------------|---------|
| <i>DDX60</i>     | 2.15                | 7.05   | 6.92    | 3.22x10 <sup>-09</sup> | 8.00x10 <sup>-07</sup> | 10.71   |
| <i>HLA-DMA</i>   | 2.15                | 8.36   | 6.08    | 8.59x10 <sup>-08</sup> | 1.43x10 <sup>-05</sup> | 7.49    |
| <i>SERPINF1</i>  | 2.13                | 10.78  | 6.09    | 8.32x10 <sup>-08</sup> | 1.39x10 <sup>-05</sup> | 7.52    |
| <i>TAF1D</i>     | 2.13                | 7.18   | 8.33    | 1.23x10 <sup>-11</sup> | 6.25x10 <sup>-09</sup> | 16.20   |
| <i>EDNRA</i>     | 2.13                | 7.78   | 5.57    | 6.26x10 <sup>-07</sup> | 7.81x10 <sup>-05</sup> | 5.54    |
| <i>ALDH1A1</i>   | 2.13                | 5.23   | 5.58    | 6.03x10 <sup>-07</sup> | 7.59x10 <sup>-05</sup> | 5.58    |
| <i>LRRC1</i>     | 2.12                | 6.60   | 8.81    | 1.88x10 <sup>-12</sup> | 1.22x10 <sup>-09</sup> | 18.06   |
| <i>SMOC2</i>     | 2.11                | 6.30   | 6.24    | 4.73x10 <sup>-08</sup> | 8.46x10 <sup>-06</sup> | 8.07    |
| <i>NPL</i>       | 2.11                | 6.41   | 9.26    | 3.34x10 <sup>-13</sup> | 2.74x10 <sup>-10</sup> | 19.77   |
| <i>ST8SIA4</i>   | 2.11                | 5.40   | 9.23    | 3.73x10 <sup>-13</sup> | 3.03x10 <sup>-10</sup> | 19.66   |
| <i>LINC01094</i> | 2.10                | 5.58   | 9.15    | 5.10x10 <sup>-13</sup> | 3.97x10 <sup>-10</sup> | 19.35   |
| <i>MEGF10</i>    | 2.10                | 6.27   | 6.05    | 9.92x10 <sup>-08</sup> | 1.61x10 <sup>-05</sup> | 7.35    |
| <i>PIK3AP1</i>   | 2.08                | 5.74   | 10.35   | 5.06x10 <sup>-15</sup> | 6.54x10 <sup>-12</sup> | 23.91   |
| <i>FMR1</i>      | 2.08                | 8.61   | 10.12   | 1.22x10 <sup>-14</sup> | 1.43x10 <sup>-11</sup> | 23.04   |
| <i>HILPDA</i>    | 2.08                | 8.58   | 6.00    | 1.18x10 <sup>-07</sup> | 1.87x10 <sup>-05</sup> | 7.18    |
| <i>CLIC2</i>     | 2.08                | 5.07   | 6.55    | 1.43x10 <sup>-08</sup> | 2.91x10 <sup>-06</sup> | 9.25    |
| <i>TRMT13</i>    | 2.07                | 6.68   | 8.29    | 1.46x10 <sup>-11</sup> | 7.24x10 <sup>-09</sup> | 16.04   |
| <i>PPEF1</i>     | 2.06                | 6.34   | 4.79    | 1.12x10 <sup>-05</sup> | 9.07x10 <sup>-04</sup> | 2.74    |
| <i>ALOX5AP</i>   | 2.05                | 6.98   | 6.57    | 1.27x10 <sup>-08</sup> | 2.65x10 <sup>-06</sup> | 9.36    |
| <i>HIST1H2AC</i> | 2.05                | 8.88   | 4.60    | 2.23x10 <sup>-05</sup> | 1.64x10 <sup>-03</sup> | 2.07    |
| <i>AIF1</i>      | 2.04                | 7.72   | 10.29   | 6.36x10 <sup>-15</sup> | 8.01x10 <sup>-12</sup> | 23.68   |
| <i>CSF2RB</i>    | 2.04                | 6.21   | 5.08    | 3.93x10 <sup>-06</sup> | 3.73x10 <sup>-04</sup> | 3.75    |
| <i>RCS1</i>      | 2.03                | 5.72   | 6.15    | 6.78x10 <sup>-08</sup> | 1.16x10 <sup>-05</sup> | 7.72    |
| <i>ARHGEF6</i>   | 2.02                | 8.92   | 12.35   | 3.43x10 <sup>-18</sup> | 1.05x10 <sup>-14</sup> | 31.11   |
| <i>RGCC</i>      | 2.02                | 5.24   | 15.31   | 1.71x10 <sup>-22</sup> | 1.65x10 <sup>-18</sup> | 40.83   |
| <i>LY86</i>      | 2.01                | 7.26   | 8.39    | 1.00x10 <sup>-11</sup> | 5.21x10 <sup>-09</sup> | 16.41   |
| <i>AIM2</i>      | 2.01                | 6.65   | 3.99    | 1.80x10 <sup>-04</sup> | 9.80x10 <sup>-03</sup> | 0.07    |
| <i>SLC7A7</i>    | 2.01                | 8.22   | 8.98    | 9.77x10 <sup>-13</sup> | 6.94x10 <sup>-10</sup> | 18.71   |
| <i>ZNF267</i>    | 1.99                | 7.08   | 8.79    | 2.08x10 <sup>-12</sup> | 1.35x10 <sup>-09</sup> | 17.96   |
| <i>SLC22A15</i>  | 1.98                | 6.43   | 4.92    | 6.92x10 <sup>-06</sup> | 6.03x10 <sup>-04</sup> | 3.20    |
| <i>C3AR1</i>     | 1.98                | 7.97   | 9.20    | 4.18x10 <sup>-13</sup> | 3.34x10 <sup>-10</sup> | 19.55   |
| <i>GSAP</i>      | 1.98                | 6.55   | 5.68    | 4.03x10 <sup>-07</sup> | 5.38x10 <sup>-05</sup> | 5.97    |
| <i>CASP1</i>     | 1.97                | 6.74   | 6.81    | 4.99x10 <sup>-09</sup> | 1.18x10 <sup>-06</sup> | 10.28   |
| <i>LUM</i>       | 1.97                | 10.58  | 5.92    | 1.65x10 <sup>-07</sup> | 2.49x10 <sup>-05</sup> | 6.85    |
| <i>APOLD1</i>    | 1.96                | 8.13   | 7.19    | 1.15x10 <sup>-09</sup> | 3.27x10 <sup>-07</sup> | 11.73   |
| <i>IFI44</i>     | 1.96                | 7.55   | 6.48    | 1.83x10 <sup>-08</sup> | 3.62x10 <sup>-06</sup> | 9.01    |
| <i>THBD</i>      | 1.96                | 6.26   | 7.69    | 1.58x10 <sup>-10</sup> | 5.73x10 <sup>-08</sup> | 13.69   |
| <i>RTN1</i>      | 1.96                | 5.43   | 7.00    | 2.39x10 <sup>-09</sup> | 6.20x10 <sup>-07</sup> | 11.01   |
| <i>ANKRD46</i>   | 1.93                | 8.09   | 7.02    | 2.21x10 <sup>-09</sup> | 5.81x10 <sup>-07</sup> | 11.08   |
| <i>N4BP2</i>     | 1.93                | 6.80   | 7.67    | 1.69x10 <sup>-10</sup> | 6.03x10 <sup>-08</sup> | 13.62   |
| <i>ROMO1</i>     | 1.93                | 8.89   | 8.03    | 4.09x10 <sup>-11</sup> | 1.79x10 <sup>-08</sup> | 15.02   |
| <i>GPRASP1</i>   | 1.93                | 6.20   | 6.06    | 9.32x10 <sup>-08</sup> | 1.53x10 <sup>-05</sup> | 7.41    |
| <i>PDK3</i>      | 1.92                | 6.80   | 8.82    | 1.79x10 <sup>-12</sup> | 1.18x10 <sup>-09</sup> | 18.11   |
| <i>CALCRL</i>    | 1.92                | 5.60   | 8.29    | 1.47x10 <sup>-11</sup> | 7.28x10 <sup>-09</sup> | 16.03   |
| <i>ELMO1</i>     | 1.91                | 5.67   | 8.13    | 2.73x10 <sup>-11</sup> | 1.25x10 <sup>-08</sup> | 15.42   |
| <i>LRP4</i>      | 1.91                | 7.46   | 4.57    | 2.45x10 <sup>-05</sup> | 1.78x10 <sup>-03</sup> | 1.98    |
| <i>LCPI</i>      | 1.91                | 7.84   | 6.01    | 1.16x10 <sup>-07</sup> | 1.85x10 <sup>-05</sup> | 7.19    |
| <i>TMEM205</i>   | 1.90                | 8.36   | 10.51   | 2.77x10 <sup>-15</sup> | 3.80x10 <sup>-12</sup> | 24.50   |
| <i>MITF</i>      | 1.90                | 6.00   | 12.29   | 4.21x10 <sup>-18</sup> | 1.24x10 <sup>-14</sup> | 30.91   |

Table SII. Continued.

| Gene symbol      | log <sub>2</sub> FC | AveExp | t-score | P-value                | P <sup>adj</sup>       | B-value |
|------------------|---------------------|--------|---------|------------------------|------------------------|---------|
| <i>TNFRSF11A</i> | 1.90                | 5.72   | 4.95    | 6.25x10 <sup>-06</sup> | 5.51x10 <sup>-04</sup> | 3.30    |
| <i>SYTL2</i>     | 1.90                | 8.04   | 7.71    | 1.44x10 <sup>-10</sup> | 5.34x10 <sup>-08</sup> | 13.77   |
| <i>FGF13</i>     | 1.89                | 5.50   | 4.35    | 5.24x10 <sup>-05</sup> | 3.43x10 <sup>-03</sup> | 1.25    |
| <i>FAM213A</i>   | 1.89                | 7.00   | 7.14    | 1.38x10 <sup>-09</sup> | 3.80x10 <sup>-07</sup> | 11.55   |
| <i>FCGR2B</i>    | 1.89                | 5.45   | 5.47    | 9.03x10 <sup>-07</sup> | 1.07x10 <sup>-04</sup> | 5.19    |
| <i>RAB38</i>     | 1.88                | 6.66   | 5.20    | 2.50x10 <sup>-06</sup> | 2.53x10 <sup>-04</sup> | 4.19    |
| <i>PDZD2</i>     | 1.88                | 5.57   | 7.43    | 4.29x10 <sup>-10</sup> | 1.36x10 <sup>-07</sup> | 12.70   |
| <i>PABPN1</i>    | 1.87                | 7.45   | 7.80    | 9.91x10 <sup>-11</sup> | 3.86x10 <sup>-08</sup> | 14.15   |
| <i>SELL</i>      | 1.87                | 5.06   | 4.50    | 3.12x10 <sup>-05</sup> | 2.18x10 <sup>-03</sup> | 1.75    |
| <i>TMEM176A</i>  | 1.86                | 7.55   | 5.47    | 8.97x10 <sup>-07</sup> | 1.06x10 <sup>-04</sup> | 5.19    |
| <i>GUCY1A2</i>   | 1.86                | 5.56   | 7.80    | 1.01x10 <sup>-10</sup> | 3.89x10 <sup>-08</sup> | 14.13   |
| <i>NOTCH2NL</i>  | 1.86                | 11.12  | 9.02    | 8.33x10 <sup>-13</sup> | 6.02x10 <sup>-10</sup> | 18.86   |
| <i>PMS2P5</i>    | 1.86                | 5.41   | 7.74    | 1.28x10 <sup>-10</sup> | 4.76x10 <sup>-08</sup> | 13.90   |
| <i>LY96</i>      | 1.85                | 8.69   | 6.19    | 5.63x10 <sup>-08</sup> | 9.83x10 <sup>-06</sup> | 7.90    |
| <i>RNASE1</i>    | 1.85                | 6.24   | 13.14   | 2.15x10 <sup>-19</sup> | 9.90x10 <sup>-16</sup> | 33.83   |
| <i>CD86</i>      | 1.85                | 5.88   | 8.68    | 3.20x10 <sup>-12</sup> | 1.97x10 <sup>-09</sup> | 17.54   |
| <i>SMAD1</i>     | 1.85                | 7.68   | 8.70    | 2.88x10 <sup>-12</sup> | 1.80x10 <sup>-09</sup> | 17.64   |
| <i>HIST1H2BC</i> | 1.85                | 6.02   | 4.30    | 6.39x10 <sup>-05</sup> | 4.05x10 <sup>-03</sup> | 1.06    |
| <i>STON1</i>     | 1.85                | 8.29   | 6.35    | 3.05x10 <sup>-08</sup> | 5.74x10 <sup>-06</sup> | 8.50    |
| <i>APLNR</i>     | 1.84                | 7.24   | 6.88    | 3.83x10 <sup>-09</sup> | 9.32x10 <sup>-07</sup> | 10.54   |
| <i>ROBO1</i>     | 1.83                | 9.57   | 8.63    | 3.83x10 <sup>-12</sup> | 2.31x10 <sup>-09</sup> | 17.36   |
| <i>STON2</i>     | 1.83                | 5.25   | 7.12    | 1.50x10 <sup>-09</sup> | 4.12x10 <sup>-07</sup> | 11.47   |
| <i>LINC00623</i> | 1.83                | 8.88   | 8.69    | 3.07x10 <sup>-12</sup> | 1.91x10 <sup>-09</sup> | 17.58   |
| <i>HLA-DQB1</i>  | 1.83                | 6.24   | 6.97    | 2.73x10 <sup>-09</sup> | 6.99x10 <sup>-07</sup> | 10.88   |
| <i>ATP6V0D2</i>  | 1.82                | 5.88   | 4.31    | 6.04x10 <sup>-05</sup> | 3.86x10 <sup>-03</sup> | 1.11    |
| <i>PTPN13</i>    | 1.82                | 7.02   | 7.03    | 2.12x10 <sup>-09</sup> | 5.60x10 <sup>-07</sup> | 11.12   |
| <i>PII5</i>      | 1.82                | 5.65   | 5.24    | 2.16x10 <sup>-06</sup> | 2.24x10 <sup>-04</sup> | 4.34    |
| <i>ESAM</i>      | 1.82                | 6.63   | 9.50    | 1.30x10 <sup>-13</sup> | 1.17x10 <sup>-10</sup> | 20.70   |
| <i>NNT-AS1</i>   | 1.81                | 6.92   | 6.86    | 4.16x10 <sup>-09</sup> | 1.01x10 <sup>-06</sup> | 10.46   |
| <i>PLEKHG1</i>   | 1.81                | 5.32   | 6.79    | 5.38x10 <sup>-09</sup> | 1.26x10 <sup>-06</sup> | 10.21   |
| <i>CD74</i>      | 1.81                | 7.52   | 8.18    | 2.21x10 <sup>-11</sup> | 1.05x10 <sup>-08</sup> | 15.62   |
| <i>PARP12</i>    | 1.81                | 7.25   | 6.76    | 6.18x10 <sup>-09</sup> | 1.42x10 <sup>-06</sup> | 10.07   |
| <i>MGST2</i>     | 1.81                | 8.07   | 10.76   | 1.10x10 <sup>-15</sup> | 1.75x10 <sup>-12</sup> | 25.42   |
| <i>DDIT4</i>     | 1.81                | 9.94   | 4.83    | 9.71x10 <sup>-06</sup> | 8.08x10 <sup>-04</sup> | 2.88    |
| <i>SYK</i>       | 1.80                | 5.97   | 8.30    | 1.41x10 <sup>-11</sup> | 7.01x10 <sup>-09</sup> | 16.07   |
| <i>BAZ1A</i>     | 1.80                | 7.96   | 9.49    | 1.34x10 <sup>-13</sup> | 1.18x10 <sup>-10</sup> | 20.67   |
| <i>RBP7</i>      | 1.80                | 6.37   | 5.22    | 2.32x10 <sup>-06</sup> | 2.39x10 <sup>-04</sup> | 4.26    |
| <i>SLA</i>       | 1.80                | 7.27   | 8.52    | 5.98x10 <sup>-12</sup> | 3.37x10 <sup>-09</sup> | 16.92   |
| <i>SNHG19</i>    | 1.79                | 8.60   | 5.67    | 4.30x10 <sup>-07</sup> | 5.70x10 <sup>-05</sup> | 5.91    |
| <i>RLF</i>       | 1.79                | 8.03   | 11.13   | 2.73x10 <sup>-16</sup> | 5.07x10 <sup>-13</sup> | 26.79   |
| <i>PPT1</i>      | 1.79                | 11.01  | 12.03   | 1.06x10 <sup>-17</sup> | 2.95x10 <sup>-14</sup> | 29.99   |
| <i>TRPS1</i>     | 1.79                | 7.67   | 8.55    | 5.22x10 <sup>-12</sup> | 3.02x10 <sup>-09</sup> | 17.05   |
| <i>C8orf59</i>   | 1.79                | 7.88   | 7.92    | 6.19x10 <sup>-11</sup> | 2.53x10 <sup>-08</sup> | 14.61   |
| <i>C16orf54</i>  | 1.78                | 4.32   | 4.29    | 6.43x10 <sup>-05</sup> | 4.07x10 <sup>-03</sup> | 1.05    |
| <i>IFIT3</i>     | 1.78                | 7.97   | 4.63    | 1.98x10 <sup>-05</sup> | 1.48x10 <sup>-03</sup> | 2.19    |
| <i>HLA-DPB1</i>  | 1.77                | 7.24   | 7.53    | 2.99x10 <sup>-10</sup> | 9.84x10 <sup>-08</sup> | 13.06   |
| <i>FCGR2A</i>    | 1.77                | 5.26   | 11.71   | 3.30x10 <sup>-17</sup> | 8.33x10 <sup>-14</sup> | 28.87   |
| <i>EDNRB</i>     | 1.77                | 5.99   | 6.33    | 3.32x10 <sup>-08</sup> | 6.17x10 <sup>-06</sup> | 8.42    |
| <i>SOX7</i>      | 1.77                | 4.88   | 8.14    | 2.61x10 <sup>-11</sup> | 1.20x10 <sup>-08</sup> | 15.46   |

Table SII. Continued.

| Gene symbol         | log <sub>2</sub> FC | AveExp | t-score | P-value                | P <sup>adj</sup>       | B-value |
|---------------------|---------------------|--------|---------|------------------------|------------------------|---------|
| <i>GCHI</i>         | 1.77                | 6.25   | 4.26    | 7.36x10 <sup>-05</sup> | 4.56x10 <sup>-03</sup> | 0.92    |
| <i>SLC27A3</i>      | 1.76                | 7.15   | 7.54    | 2.79x10 <sup>-10</sup> | 9.24x10 <sup>-08</sup> | 13.13   |
| <i>ZNF43</i>        | 1.76                | 7.24   | 8.21    | 1.98x10 <sup>-11</sup> | 9.51x10 <sup>-09</sup> | 15.73   |
| <i>RUBCNL</i>       | 1.76                | 5.84   | 5.63    | 4.94x10 <sup>-07</sup> | 6.42x10 <sup>-05</sup> | 5.77    |
| <i>ENPP2</i>        | 1.75                | 9.77   | 4.80    | 1.06x10 <sup>-05</sup> | 8.69x10 <sup>-04</sup> | 2.79    |
| <i>COL3A1</i>       | 1.74                | 10.81  | 5.81    | 2.48x10 <sup>-07</sup> | 3.53x10 <sup>-05</sup> | 6.45    |
| <i>COL21A1</i>      | 1.74                | 7.34   | 4.92    | 7.08x10 <sup>-06</sup> | 6.14x10 <sup>-04</sup> | 3.18    |
| <i>MYLIP</i>        | 1.73                | 7.06   | 9.41    | 1.84x10 <sup>-13</sup> | 1.59x10 <sup>-10</sup> | 20.36   |
| <i>CRIP1</i>        | 1.73                | 8.80   | 4.09    | 1.27x10 <sup>-04</sup> | 7.34x10 <sup>-03</sup> | 0.40    |
| <i>WWP1</i>         | 1.73                | 8.81   | 6.69    | 8.07x10 <sup>-09</sup> | 1.80x10 <sup>-06</sup> | 9.81    |
| <i>GBP2</i>         | 1.73                | 6.95   | 4.93    | 6.82x10 <sup>-06</sup> | 5.94x10 <sup>-04</sup> | 3.22    |
| <i>AKAP10</i>       | 1.73                | 6.59   | 8.35    | 1.16x10 <sup>-11</sup> | 5.93x10 <sup>-09</sup> | 16.26   |
| <i>ANKRD36B</i>     | 1.73                | 7.10   | 5.49    | 8.29x10 <sup>-07</sup> | 1.00x10 <sup>-04</sup> | 5.27    |
| <i>LINC02256</i>    | 1.73                | 6.57   | 10.51   | 2.74x10 <sup>-15</sup> | 3.79x10 <sup>-12</sup> | 24.51   |
| <i>HIST1H2BD</i>    | 1.72                | 7.95   | 5.43    | 1.04x10 <sup>-06</sup> | 1.20x10 <sup>-04</sup> | 5.05    |
| <i>SOD2</i>         | 1.72                | 6.70   | 5.29    | 1.74x10 <sup>-06</sup> | 1.87x10 <sup>-04</sup> | 4.54    |
| <i>NEURL1B</i>      | 1.72                | 7.86   | 6.55    | 1.40x10 <sup>-08</sup> | 2.86x10 <sup>-06</sup> | 9.27    |
| <i>ENTPD1</i>       | 1.71                | 6.06   | 6.37    | 2.88x10 <sup>-08</sup> | 5.45x10 <sup>-06</sup> | 8.56    |
| <i>LOC100289333</i> | 1.71                | 7.73   | 9.03    | 8.04x10 <sup>-13</sup> | 5.85x10 <sup>-10</sup> | 18.90   |
| <i>COX6C</i>        | 1.71                | 11.77  | 12.35   | 3.38x10 <sup>-18</sup> | 1.05x10 <sup>-14</sup> | 31.12   |
| <i>LGMN</i>         | 1.71                | 9.88   | 8.30    | 1.40x10 <sup>-11</sup> | 6.99x10 <sup>-09</sup> | 16.08   |
| <i>TNN</i>          | 1.70                | 6.40   | 4.28    | 6.73x10 <sup>-05</sup> | 4.23x10 <sup>-03</sup> | 1.01    |
| <i>TLR2</i>         | 1.70                | 6.99   | 7.68    | 1.63x10 <sup>-10</sup> | 5.86x10 <sup>-08</sup> | 13.65   |
| <i>IFI6</i>         | 1.70                | 8.25   | 4.52    | 2.89x10 <sup>-05</sup> | 2.05x10 <sup>-03</sup> | 1.82    |
| <i>SAMHD1</i>       | 1.70                | 7.25   | 7.09    | 1.68x10 <sup>-09</sup> | 4.54x10 <sup>-07</sup> | 11.36   |
| <i>HENMT1</i>       | 1.70                | 7.84   | 7.24    | 9.23x10 <sup>-10</sup> | 2.70x10 <sup>-07</sup> | 11.94   |
| <i>LINC02475</i>    | 1.70                | 5.77   | 4.31    | 6.15x10 <sup>-05</sup> | 3.92x10 <sup>-03</sup> | 1.09    |
| <i>OFD1</i>         | 1.69                | 6.66   | 8.30    | 1.40x10 <sup>-11</sup> | 6.99x10 <sup>-09</sup> | 16.08   |
| <i>RERG</i>         | 1.68                | 6.27   | 5.21    | 2.41x10 <sup>-06</sup> | 2.46x10 <sup>-04</sup> | 4.23    |
| <i>FNIP2</i>        | 1.68                | 7.51   | 7.19    | 1.13x10 <sup>-09</sup> | 3.22x10 <sup>-07</sup> | 11.75   |
| <i>PM20D2</i>       | 1.68                | 6.24   | 8.72    | 2.69x10 <sup>-12</sup> | 1.69x10 <sup>-09</sup> | 17.71   |
| <i>TMCC3</i>        | 1.68                | 5.49   | 7.81    | 9.87x10 <sup>-11</sup> | 3.85x10 <sup>-08</sup> | 14.15   |
| <i>POGZ</i>         | 1.68                | 7.97   | 11.37   | 1.16x10 <sup>-16</sup> | 2.50x10 <sup>-13</sup> | 27.64   |
| <i>MTF2</i>         | 1.67                | 7.31   | 9.02    | 8.26x10 <sup>-13</sup> | 5.99x10 <sup>-10</sup> | 18.87   |
| <i>BST2</i>         | 1.67                | 6.87   | 3.99    | 1.80x10 <sup>-04</sup> | 9.84x10 <sup>-03</sup> | 0.06    |
| <i>LSM7</i>         | 1.66                | 9.86   | 6.57    | 1.31x10 <sup>-08</sup> | 2.72x10 <sup>-06</sup> | 9.33    |
| <i>TMEM150C</i>     | 1.65                | 6.06   | 5.41    | 1.11x10 <sup>-06</sup> | 1.27x10 <sup>-04</sup> | 4.98    |
| <i>ZNF273</i>       | 1.65                | 5.04   | 7.95    | 5.59x10 <sup>-11</sup> | 2.36x10 <sup>-08</sup> | 14.71   |
| <i>DCHS1</i>        | 1.65                | 6.56   | 7.07    | 1.82x10 <sup>-09</sup> | 4.86x10 <sup>-07</sup> | 11.28   |
| <i>TLR1</i>         | 1.65                | 4.94   | 7.39    | 5.05x10 <sup>-10</sup> | 1.56x10 <sup>-07</sup> | 12.54   |
| <i>CD83</i>         | 1.65                | 7.41   | 7.69    | 1.58x10 <sup>-10</sup> | 5.73x10 <sup>-08</sup> | 13.69   |
| <i>ANGPT2</i>       | 1.65                | 5.85   | 5.69    | 3.87x10 <sup>-07</sup> | 5.21x10 <sup>-05</sup> | 6.01    |
| <i>CCL4</i>         | 1.65                | 6.85   | 5.00    | 5.15x10 <sup>-06</sup> | 4.69x10 <sup>-04</sup> | 3.49    |
| <i>TRAC</i>         | 1.65                | 6.50   | 4.53    | 2.79x10 <sup>-05</sup> | 1.99x10 <sup>-03</sup> | 1.85    |
| <i>TM6SF1</i>       | 1.64                | 5.44   | 7.61    | 2.17x10 <sup>-10</sup> | 7.49x10 <sup>-08</sup> | 13.37   |
| <i>HSPA6</i>        | 1.64                | 6.56   | 5.08    | 3.88x10 <sup>-06</sup> | 3.70x10 <sup>-04</sup> | 3.77    |
| <i>ZNF12</i>        | 1.64                | 8.22   | 7.68    | 1.61x10 <sup>-10</sup> | 5.80x10 <sup>-08</sup> | 13.66   |
| <i>ANKRD10-IT1</i>  | 1.64                | 7.93   | 6.39    | 2.63x10 <sup>-08</sup> | 5.04x10 <sup>-06</sup> | 8.65    |
| <i>GPR65</i>        | 1.63                | 6.25   | 5.74    | 3.22x10 <sup>-07</sup> | 4.42x10 <sup>-05</sup> | 6.19    |

Table SII. Continued.

| Gene symbol       | log <sub>2</sub> FC | AveExp | t-score | P-value                | P <sup>adj</sup>       | B-value |
|-------------------|---------------------|--------|---------|------------------------|------------------------|---------|
| <i>MZT2B</i>      | 1.63                | 7.28   | 7.40    | 4.89x10 <sup>-10</sup> | 1.52x10 <sup>-07</sup> | 12.57   |
| <i>OLFML2A</i>    | 1.63                | 8.12   | 5.85    | 2.14x10 <sup>-07</sup> | 3.12x10 <sup>-05</sup> | 6.59    |
| <i>FGFR3</i>      | 1.63                | 5.91   | 4.37    | 5.01x10 <sup>-05</sup> | 3.30x10 <sup>-03</sup> | 1.29    |
| <i>CPA3</i>       | 1.62                | 5.70   | 4.00    | 1.77x10 <sup>-04</sup> | 9.69x10 <sup>-03</sup> | 0.08    |
| <i>ATP2B1-AS1</i> | 1.61                | 7.19   | 6.00    | 1.19x10 <sup>-07</sup> | 1.89x10 <sup>-05</sup> | 7.17    |
| <i>CADPS2</i>     | 1.61                | 6.93   | 5.89    | 1.79x10 <sup>-07</sup> | 2.66x10 <sup>-05</sup> | 6.77    |
| <i>HLA-DQA1</i>   | 1.61                | 5.30   | 4.43    | 4.08x10 <sup>-05</sup> | 2.76x10 <sup>-03</sup> | 1.49    |
| <i>SLC29A1</i>    | 1.61                | 7.01   | 4.59    | 2.32x10 <sup>-05</sup> | 1.69x10 <sup>-03</sup> | 2.04    |
| <i>BTN3A2</i>     | 1.61                | 7.49   | 6.89    | 3.74x10 <sup>-09</sup> | 9.13x10 <sup>-07</sup> | 10.57   |
| <i>PCDH7</i>      | 1.60                | 5.67   | 5.50    | 8.16x10 <sup>-07</sup> | 9.87x10 <sup>-05</sup> | 5.29    |
| <i>SLC44A3</i>    | 1.60                | 5.22   | 6.24    | 4.68x10 <sup>-08</sup> | 8.38x10 <sup>-06</sup> | 8.08    |
| <i>RAB31</i>      | 1.60                | 11.05  | 9.27    | 3.20x10 <sup>-13</sup> | 2.64x10 <sup>-10</sup> | 19.81   |
| <i>S1PR1</i>      | 1.60                | 7.74   | 7.15    | 1.31x10 <sup>-09</sup> | 3.63x10 <sup>-07</sup> | 11.60   |
| <i>COX1</i>       | 1.59                | 13.91  | 9.12    | 5.74x10 <sup>-13</sup> | 4.41x10 <sup>-10</sup> | 19.23   |
| <i>PSMD6-AS2</i>  | 1.59                | 7.36   | 5.94    | 1.52x10 <sup>-07</sup> | 2.32x10 <sup>-05</sup> | 6.93    |
| <i>GCA</i>        | 1.59                | 6.06   | 5.72    | 3.52x10 <sup>-07</sup> | 4.78x10 <sup>-05</sup> | 6.11    |
| <i>PLEK</i>       | 1.59                | 6.86   | 5.98    | 1.31x10 <sup>-07</sup> | 2.04x10 <sup>-05</sup> | 7.08    |
| <i>CHD1</i>       | 1.58                | 7.96   | 9.25    | 3.36x10 <sup>-13</sup> | 2.75x10 <sup>-10</sup> | 19.76   |
| <i>SAMSN1</i>     | 1.58                | 4.99   | 6.61    | 1.12x10 <sup>-08</sup> | 2.39x10 <sup>-06</sup> | 9.49    |
| <i>TDO2</i>       | 1.58                | 5.04   | 5.19    | 2.55x10 <sup>-06</sup> | 2.58x10 <sup>-04</sup> | 4.17    |
| <i>SIGLEC1</i>    | 1.58                | 6.25   | 5.03    | 4.65x10 <sup>-06</sup> | 4.30x10 <sup>-04</sup> | 3.59    |
| <i>PTBP2</i>      | 1.58                | 6.64   | 6.99    | 2.44x10 <sup>-09</sup> | 6.32x10 <sup>-07</sup> | 10.99   |
| <i>CDC7</i>       | 1.57                | 7.48   | 4.84    | 9.30x10 <sup>-06</sup> | 7.79x10 <sup>-04</sup> | 2.92    |
| <i>SLAMF8</i>     | 1.57                | 5.63   | 5.49    | 8.38x10 <sup>-07</sup> | 1.01x10 <sup>-04</sup> | 5.26    |
| <i>RNF144A</i>    | 1.56                | 5.73   | 11.44   | 8.93x10 <sup>-17</sup> | 2.01x10 <sup>-13</sup> | 27.89   |
| <i>DANCR</i>      | 1.56                | 9.16   | 5.81    | 2.43x10 <sup>-07</sup> | 3.48x10 <sup>-05</sup> | 6.47    |
| <i>MYO5C</i>      | 1.56                | 6.02   | 6.84    | 4.42x10 <sup>-09</sup> | 1.06x10 <sup>-06</sup> | 10.40   |
| <i>CDKN3</i>      | 1.56                | 8.38   | 4.13    | 1.13x10 <sup>-04</sup> | 6.62x10 <sup>-03</sup> | 0.51    |
| <i>KLHL8</i>      | 1.56                | 7.09   | 9.18    | 4.49x10 <sup>-13</sup> | 3.54x10 <sup>-10</sup> | 19.48   |
| <i>SHPRH</i>      | 1.56                | 6.36   | 6.70    | 7.74x10 <sup>-09</sup> | 1.73x10 <sup>-06</sup> | 9.85    |
| <i>MATN2</i>      | 1.55                | 6.54   | 8.89    | 1.38x10 <sup>-12</sup> | 9.33x10 <sup>-10</sup> | 18.37   |
| <i>LPAR4</i>      | 1.54                | 5.44   | 4.90    | 7.36x10 <sup>-06</sup> | 6.36x10 <sup>-04</sup> | 3.14    |
| <i>TFEC</i>       | 1.54                | 4.57   | 6.81    | 5.11x10 <sup>-09</sup> | 1.20x10 <sup>-06</sup> | 10.26   |
| <i>MGAT4A</i>     | 1.54                | 5.08   | 9.68    | 6.55x10 <sup>-14</sup> | 6.54x10 <sup>-11</sup> | 21.38   |
| <i>ZSWIM6</i>     | 1.53                | 9.11   | 9.16    | 4.80x10 <sup>-13</sup> | 3.75x10 <sup>-10</sup> | 19.41   |
| <i>MBOAT1</i>     | 1.53                | 5.88   | 6.08    | 8.86x10 <sup>-08</sup> | 1.46x10 <sup>-05</sup> | 7.46    |
| <i>SLCO2B1</i>    | 1.53                | 6.18   | 8.39    | 1.00x10 <sup>-11</sup> | 5.22x10 <sup>-09</sup> | 16.41   |
| <i>HIST1H2AE</i>  | 1.53                | 4.83   | 4.27    | 6.96x10 <sup>-05</sup> | 4.36x10 <sup>-03</sup> | 0.98    |
| <i>ZNF266</i>     | 1.53                | 8.28   | 7.77    | 1.14x10 <sup>-10</sup> | 4.37x10 <sup>-08</sup> | 14.01   |
| <i>PLXNC1</i>     | 1.53                | 5.44   | 8.69    | 3.03x10 <sup>-12</sup> | 1.89x10 <sup>-09</sup> | 17.59   |
| <i>LEF1</i>       | 1.53                | 5.55   | 11.93   | 1.49x10 <sup>-17</sup> | 3.93x10 <sup>-14</sup> | 29.66   |
| <i>RNF13</i>      | 1.53                | 9.17   | 8.93    | 1.18x10 <sup>-12</sup> | 8.22x10 <sup>-10</sup> | 18.52   |
| <i>GPX3</i>       | 1.53                | 7.79   | 4.17    | 9.83x10 <sup>-05</sup> | 5.87x10 <sup>-03</sup> | 0.64    |
| <i>LCORL</i>      | 1.53                | 6.45   | 7.88    | 7.31x10 <sup>-11</sup> | 2.94x10 <sup>-08</sup> | 14.45   |
| <i>THSD7A</i>     | 1.53                | 5.31   | 6.67    | 8.69x10 <sup>-09</sup> | 1.92x10 <sup>-06</sup> | 9.74    |
| <i>TPRG1</i>      | 1.53                | 5.03   | 5.55    | 6.68x10 <sup>-07</sup> | 8.24x10 <sup>-05</sup> | 5.48    |
| <i>TMEM51</i>     | 1.53                | 6.53   | 7.51    | 3.18x10 <sup>-10</sup> | 1.04x10 <sup>-07</sup> | 12.99   |
| <i>FABP5</i>      | 1.52                | 10.46  | 6.16    | 6.52x10 <sup>-08</sup> | 1.12x10 <sup>-05</sup> | 7.76    |
| <i>RPL11</i>      | 1.52                | 12.71  | 7.88    | 7.26x10 <sup>-11</sup> | 2.94x10 <sup>-08</sup> | 14.45   |

Table SII. Continued.

| Gene symbol      | log <sub>2</sub> FC | AveExp | t-score | P-value                | P <sup>adj</sup>       | B-value |
|------------------|---------------------|--------|---------|------------------------|------------------------|---------|
| <i>PLXDC1</i>    | 1.52                | 6.28   | 6.61    | 1.10x10 <sup>-08</sup> | 2.36x10 <sup>-06</sup> | 9.50    |
| <i>SIPA1L2</i>   | 1.52                | 6.09   | 10.15   | 1.10x10 <sup>-14</sup> | 1.29x10 <sup>-11</sup> | 23.14   |
| <i>LYSMD2</i>    | 1.52                | 7.94   | 7.10    | 1.61x10 <sup>-09</sup> | 4.38x10 <sup>-07</sup> | 11.40   |
| <i>ITGB3BP</i>   | 1.52                | 8.93   | 5.42    | 1.09x10 <sup>-06</sup> | 1.25x10 <sup>-04</sup> | 5.01    |
| <i>OAS1</i>      | 1.52                | 5.85   | 4.34    | 5.49x10 <sup>-05</sup> | 3.56x10 <sup>-03</sup> | 1.20    |
| <i>ABCA5</i>     | 1.52                | 5.63   | 6.60    | 1.16x10 <sup>-08</sup> | 2.46x10 <sup>-06</sup> | 9.45    |
| <i>MCTP1</i>     | 1.52                | 5.15   | 6.95    | 2.89x10 <sup>-09</sup> | 7.32x10 <sup>-07</sup> | 10.82   |
| <i>APOE</i>      | 1.51                | 6.57   | 6.33    | 3.30x10 <sup>-08</sup> | 6.15x10 <sup>-06</sup> | 8.42    |
| <i>KHDC4</i>     | 1.51                | 7.70   | 6.31    | 3.53x10 <sup>-08</sup> | 6.49x10 <sup>-06</sup> | 8.36    |
| <i>DTX3L</i>     | 1.51                | 8.90   | 7.68    | 1.61x10 <sup>-10</sup> | 5.80x10 <sup>-08</sup> | 13.67   |
| <i>CTNNB1</i>    | 1.51                | 8.28   | 9.09    | 6.26x10 <sup>-13</sup> | 4.74x10 <sup>-10</sup> | 19.15   |
| <i>DMXL2</i>     | 1.51                | 7.00   | 8.44    | 7.96x10 <sup>-12</sup> | 4.29x10 <sup>-09</sup> | 16.63   |
| <i>PRPF38B</i>   | 1.51                | 7.31   | 7.45    | 4.02x10 <sup>-10</sup> | 1.28x10 <sup>-07</sup> | 12.76   |
| <i>HSPBAP1</i>   | 1.50                | 6.22   | 6.82    | 4.89x10 <sup>-09</sup> | 1.16x10 <sup>-06</sup> | 10.30   |
| <i>SDC2</i>      | 1.50                | 10.13  | 5.68    | 4.04x10 <sup>-07</sup> | 5.39x10 <sup>-05</sup> | 5.97    |
| <i>DLX5</i>      | 1.50                | 7.33   | 4.15    | 1.05x10 <sup>-04</sup> | 6.20x10 <sup>-03</sup> | 0.58    |
| <i>MSANTD2</i>   | 1.50                | 7.61   | 6.87    | 3.93x10 <sup>-09</sup> | 9.55x10 <sup>-07</sup> | 10.52   |
| <i>MTERF3</i>    | 1.49                | 8.69   | 6.09    | 8.41x10 <sup>-08</sup> | 1.40x10 <sup>-05</sup> | 7.51    |
| <i>DNM3OS</i>    | 1.49                | 7.29   | 4.45    | 3.69x10 <sup>-05</sup> | 2.53x10 <sup>-03</sup> | 1.58    |
| <i>KANSL1</i>    | 1.49                | 7.88   | 8.96    | 1.05x10 <sup>-12</sup> | 7.44x10 <sup>-10</sup> | 18.63   |
| <i>GIMAP8</i>    | 1.49                | 4.97   | 9.59    | 9.02x10 <sup>-14</sup> | 8.49x10 <sup>-11</sup> | 21.06   |
| <i>FERMT3</i>    | 1.49                | 6.82   | 5.49    | 8.49x10 <sup>-07</sup> | 1.02x10 <sup>-04</sup> | 5.25    |
| <i>STAG2</i>     | 1.48                | 9.67   | 7.80    | 1.01x10 <sup>-10</sup> | 3.89x10 <sup>-08</sup> | 14.13   |
| <i>DPY19L2</i>   | 1.48                | 5.13   | 4.44    | 3.91x10 <sup>-05</sup> | 2.65x10 <sup>-03</sup> | 1.53    |
| <i>GLUL</i>      | 1.48                | 8.04   | 6.56    | 1.33x10 <sup>-08</sup> | 2.74x10 <sup>-06</sup> | 9.32    |
| <i>IFIT2</i>     | 1.48                | 6.63   | 4.57    | 2.46x10 <sup>-05</sup> | 1.78x10 <sup>-03</sup> | 1.98    |
| <i>KLHL2</i>     | 1.48                | 8.28   | 7.41    | 4.77x10 <sup>-10</sup> | 1.49x10 <sup>-07</sup> | 12.59   |
| <i>CXADR</i>     | 1.48                | 5.00   | 4.67    | 1.69x10 <sup>-05</sup> | 1.30x10 <sup>-03</sup> | 2.34    |
| <i>CHN2</i>      | 1.47                | 5.44   | 6.19    | 5.63x10 <sup>-08</sup> | 9.83x10 <sup>-06</sup> | 7.90    |
| <i>DDX55</i>     | 1.47                | 6.21   | 7.43    | 4.44x10 <sup>-10</sup> | 1.40x10 <sup>-07</sup> | 12.66   |
| <i>PRKDC</i>     | 1.47                | 7.04   | 8.15    | 2.58x10 <sup>-11</sup> | 1.19x10 <sup>-08</sup> | 15.47   |
| <i>FRG1BP</i>    | 1.47                | 5.53   | 6.79    | 5.41x10 <sup>-09</sup> | 1.26x10 <sup>-06</sup> | 10.20   |
| <i>RAPGEF4</i>   | 1.46                | 4.27   | 6.59    | 1.20x10 <sup>-08</sup> | 2.53x10 <sup>-06</sup> | 9.42    |
| <i>RUNX2</i>     | 1.46                | 7.14   | 7.61    | 2.17x10 <sup>-10</sup> | 7.49x10 <sup>-08</sup> | 13.37   |
| <i>ZNF136</i>    | 1.45                | 6.94   | 7.11    | 1.56x10 <sup>-09</sup> | 4.25x10 <sup>-07</sup> | 11.43   |
| <i>IFI16</i>     | 1.45                | 9.67   | 6.32    | 3.49x10 <sup>-08</sup> | 6.45x10 <sup>-06</sup> | 8.37    |
| <i>STEAP4</i>    | 1.45                | 5.14   | 4.53    | 2.80x10 <sup>-05</sup> | 2.00x10 <sup>-03</sup> | 1.85    |
| <i>MRPS28</i>    | 1.45                | 8.67   | 6.53    | 1.51x10 <sup>-08</sup> | 3.06x10 <sup>-06</sup> | 9.20    |
| <i>ITGB2</i>     | 1.45                | 6.69   | 6.48    | 1.87x10 <sup>-08</sup> | 3.70x10 <sup>-06</sup> | 8.98    |
| <i>HIF0</i>      | 1.45                | 9.46   | 6.00    | 1.21x10 <sup>-07</sup> | 1.91x10 <sup>-05</sup> | 7.16    |
| <i>HIST1H2BH</i> | 1.45                | 6.27   | 4.45    | 3.80x10 <sup>-05</sup> | 2.59x10 <sup>-03</sup> | 1.56    |
| <i>TMEM251</i>   | 1.45                | 8.19   | 6.55    | 1.42x10 <sup>-08</sup> | 2.91x10 <sup>-06</sup> | 9.25    |
| <i>ECSCR</i>     | 1.45                | 6.43   | 5.76    | 3.04x10 <sup>-07</sup> | 4.21x10 <sup>-05</sup> | 6.25    |
| <i>XAF1</i>      | 1.44                | 6.64   | 5.06    | 4.10x10 <sup>-06</sup> | 3.86x10 <sup>-04</sup> | 3.71    |
| <i>TMEM65</i>    | 1.44                | 7.25   | 7.19    | 1.14x10 <sup>-09</sup> | 3.26x10 <sup>-07</sup> | 11.73   |
| <i>NOL8</i>      | 1.44                | 8.05   | 6.58    | 1.22x10 <sup>-08</sup> | 2.56x10 <sup>-06</sup> | 9.40    |
| <i>CD84</i>      | 1.44                | 5.66   | 6.88    | 3.86x10 <sup>-09</sup> | 9.39x10 <sup>-07</sup> | 10.54   |
| <i>GOLGA4</i>    | 1.44                | 8.29   | 8.50    | 6.45x10 <sup>-12</sup> | 3.57x10 <sup>-09</sup> | 16.84   |
| <i>CORO1A</i>    | 1.43                | 6.44   | 4.21    | 8.46x10 <sup>-05</sup> | 5.14x10 <sup>-03</sup> | 0.79    |



Table SII. Continued.

| Gene symbol      | log <sub>2</sub> FC | AveExp | t-score | P-value                | P <sup>adj</sup>       | B-value |
|------------------|---------------------|--------|---------|------------------------|------------------------|---------|
| <i>MAF</i>       | 1.43                | 5.58   | 8.52    | 5.86x10 <sup>-12</sup> | 3.34x10 <sup>-09</sup> | 16.94   |
| <i>RAI2</i>      | 1.43                | 5.90   | 4.02    | 1.62x10 <sup>-04</sup> | 8.98x10 <sup>-03</sup> | 0.17    |
| <i>IRF7</i>      | 1.43                | 7.04   | 5.29    | 1.77x10 <sup>-06</sup> | 1.90x10 <sup>-04</sup> | 4.53    |
| <i>NCF4</i>      | 1.43                | 5.91   | 5.39    | 1.23x10 <sup>-06</sup> | 1.39x10 <sup>-04</sup> | 4.88    |
| <i>NCKAP1L</i>   | 1.43                | 6.19   | 6.22    | 5.11x10 <sup>-08</sup> | 9.06x10 <sup>-06</sup> | 8.00    |
| <i>FAM96A</i>    | 1.43                | 10.20  | 11.52   | 6.65x10 <sup>-17</sup> | 1.56x10 <sup>-13</sup> | 28.18   |
| <i>FLT1</i>      | 1.43                | 5.77   | 11.16   | 2.49x10 <sup>-16</sup> | 4.80x10 <sup>-13</sup> | 26.88   |
| <i>FAM217B</i>   | 1.43                | 7.31   | 5.86    | 2.06x10 <sup>-07</sup> | 3.02x10 <sup>-05</sup> | 6.63    |
| <i>GPBP1L1</i>   | 1.43                | 7.54   | 10.27   | 6.79x10 <sup>-15</sup> | 8.51x10 <sup>-12</sup> | 23.62   |
| <i>GIMAP1</i>    | 1.43                | 5.09   | 5.93    | 1.55x10 <sup>-07</sup> | 2.36x10 <sup>-05</sup> | 6.91    |
| <i>NAMPT</i>     | 1.42                | 7.43   | 5.48    | 8.66x10 <sup>-07</sup> | 1.03x10 <sup>-04</sup> | 5.23    |
| <i>RALGDS</i>    | 1.42                | 7.43   | 7.68    | 1.59x10 <sup>-10</sup> | 5.78x10 <sup>-08</sup> | 13.68   |
| <i>ACKR3</i>     | 1.42                | 5.61   | 7.10    | 1.58x10 <sup>-09</sup> | 4.30x10 <sup>-07</sup> | 11.42   |
| <i>HMGN3</i>     | 1.42                | 10.92  | 7.42    | 4.47x10 <sup>-10</sup> | 1.41x10 <sup>-07</sup> | 12.66   |
| <i>TSPAN11</i>   | 1.42                | 6.81   | 4.44    | 3.83x10 <sup>-05</sup> | 2.61x10 <sup>-03</sup> | 1.55    |
| <i>LSP1</i>      | 1.42                | 7.32   | 4.45    | 3.68x10 <sup>-05</sup> | 2.53x10 <sup>-03</sup> | 1.59    |
| <i>TMEM176B</i>  | 1.42                | 6.00   | 6.04    | 1.04x10 <sup>-07</sup> | 1.67x10 <sup>-05</sup> | 7.30    |
| <i>FNTB</i>      | 1.41                | 4.82   | 7.81    | 9.79x10 <sup>-11</sup> | 3.82x10 <sup>-08</sup> | 14.16   |
| <i>ATP6V0B</i>   | 1.41                | 10.32  | 7.21    | 1.02x10 <sup>-09</sup> | 2.97x10 <sup>-07</sup> | 11.84   |
| <i>PARM1</i>     | 1.41                | 5.83   | 4.68    | 1.66x10 <sup>-05</sup> | 1.28x10 <sup>-03</sup> | 2.36    |
| <i>HSD17B11</i>  | 1.41                | 8.90   | 7.24    | 9.09x10 <sup>-10</sup> | 2.67x10 <sup>-07</sup> | 11.96   |
| <i>PTPN6</i>     | 1.41                | 6.43   | 5.10    | 3.61x10 <sup>-06</sup> | 3.49x10 <sup>-04</sup> | 3.84    |
| <i>NSUN6</i>     | 1.41                | 5.77   | 7.07    | 1.79x10 <sup>-09</sup> | 4.80x10 <sup>-07</sup> | 11.29   |
| <i>IRF8</i>      | 1.41                | 7.41   | 4.37    | 4.96x10 <sup>-05</sup> | 3.28x10 <sup>-03</sup> | 1.30    |
| <i>CSRP2</i>     | 1.40                | 9.80   | 4.99    | 5.41x10 <sup>-06</sup> | 4.88x10 <sup>-04</sup> | 3.44    |
| <i>GPR160</i>    | 1.40                | 5.28   | 6.98    | 2.58x10 <sup>-09</sup> | 6.66x10 <sup>-07</sup> | 10.93   |
| <i>CD37</i>      | 1.40                | 4.93   | 4.29    | 6.54x10 <sup>-05</sup> | 4.13x10 <sup>-03</sup> | 1.04    |
| <i>ACADM</i>     | 1.40                | 9.30   | 7.18    | 1.16x10 <sup>-09</sup> | 3.29x10 <sup>-07</sup> | 11.72   |
| <i>SRSF11</i>    | 1.40                | 7.57   | 8.30    | 1.41x10 <sup>-11</sup> | 7.01x10 <sup>-09</sup> | 16.07   |
| <i>LINC01355</i> | 1.40                | 5.56   | 6.58    | 1.26x10 <sup>-08</sup> | 2.62x10 <sup>-06</sup> | 9.38    |
| <i>A2M-AS1</i>   | 1.40                | 4.98   | 8.89    | 1.38x10 <sup>-12</sup> | 9.33x10 <sup>-10</sup> | 18.37   |
| <i>S100A10</i>   | 1.39                | 9.44   | 4.80    | 1.06x10 <sup>-05</sup> | 8.67x10 <sup>-04</sup> | 2.79    |
| <i>CNTN4</i>     | 1.39                | 4.88   | 4.80    | 1.07x10 <sup>-05</sup> | 8.74x10 <sup>-04</sup> | 2.78    |
| <i>RPL29</i>     | 1.39                | 12.25  | 6.49    | 1.77x10 <sup>-08</sup> | 3.53x10 <sup>-06</sup> | 9.04    |
| <i>PAG1</i>      | 1.39                | 5.91   | 4.61    | 2.15x10 <sup>-05</sup> | 1.59x10 <sup>-03</sup> | 2.11    |
| <i>BCL11A</i>    | 1.39                | 6.19   | 4.56    | 2.51x10 <sup>-05</sup> | 1.81x10 <sup>-03</sup> | 1.96    |
| <i>PIK3R1</i>    | 1.39                | 7.69   | 5.13    | 3.24x10 <sup>-06</sup> | 3.16x10 <sup>-04</sup> | 3.94    |
| <i>FCGBP</i>     | 1.39                | 6.56   | 4.23    | 7.99x10 <sup>-05</sup> | 4.90x10 <sup>-03</sup> | 0.84    |
| <i>EBLN2</i>     | 1.39                | 6.96   | 7.70    | 1.49x10 <sup>-10</sup> | 5.47x10 <sup>-08</sup> | 13.74   |
| <i>FZD3</i>      | 1.38                | 5.35   | 5.05    | 4.37x10 <sup>-06</sup> | 4.08x10 <sup>-04</sup> | 3.65    |
| <i>CHD8</i>      | 1.38                | 7.53   | 10.15   | 1.08x10 <sup>-14</sup> | 1.28x10 <sup>-11</sup> | 23.16   |
| <i>MERTK</i>     | 1.38                | 5.31   | 9.71    | 5.86x10 <sup>-14</sup> | 5.97x10 <sup>-11</sup> | 21.49   |
| <i>CD53</i>      | 1.38                | 5.68   | 8.72    | 2.67x10 <sup>-12</sup> | 1.69x10 <sup>-09</sup> | 17.71   |
| <i>RASL12</i>    | 1.38                | 6.55   | 5.17    | 2.80x10 <sup>-06</sup> | 2.80x10 <sup>-04</sup> | 4.08    |
| <i>STXBP6</i>    | 1.37                | 5.22   | 4.52    | 2.97x10 <sup>-05</sup> | 2.10x10 <sup>-03</sup> | 1.79    |
| <i>NFKBIE</i>    | 1.37                | 6.62   | 5.99    | 1.23x10 <sup>-07</sup> | 1.93x10 <sup>-05</sup> | 7.14    |
| <i>MMRN2</i>     | 1.37                | 5.20   | 8.77    | 2.20x10 <sup>-12</sup> | 1.41x10 <sup>-09</sup> | 17.91   |
| <i>EYA1</i>      | 1.37                | 5.54   | 4.96    | 6.10x10 <sup>-06</sup> | 5.40x10 <sup>-04</sup> | 3.33    |
| <i>CKS2</i>      | 1.36                | 10.59  | 4.01    | 1.67x10 <sup>-04</sup> | 9.22x10 <sup>-03</sup> | 0.14    |

Table SII. Continued.

| Gene symbol         | log <sub>2</sub> FC | AveExp | t-score | P-value                | P <sup>adj</sup>       | B-value |
|---------------------|---------------------|--------|---------|------------------------|------------------------|---------|
| <i>TTC32</i>        | 1.36                | 6.64   | 5.38    | 1.26x10 <sup>-06</sup> | 1.41x10 <sup>-04</sup> | 4.86    |
| <i>SDHAF3</i>       | 1.36                | 7.03   | 6.00    | 1.21x10 <sup>-07</sup> | 1.92x10 <sup>-05</sup> | 7.15    |
| <i>ATP6V1G1</i>     | 1.36                | 8.75   | 8.28    | 1.49x10 <sup>-11</sup> | 7.36x10 <sup>-09</sup> | 16.01   |
| <i>TBC1D8</i>       | 1.36                | 6.85   | 6.80    | 5.24x10 <sup>-09</sup> | 1.23x10 <sup>-06</sup> | 10.23   |
| <i>ZNF700</i>       | 1.36                | 6.32   | 5.28    | 1.86x10 <sup>-06</sup> | 1.97x10 <sup>-04</sup> | 4.48    |
| <i>TREM2</i>        | 1.36                | 6.99   | 6.22    | 5.12x10 <sup>-08</sup> | 9.06x10 <sup>-06</sup> | 7.99    |
| <i>ZNF559</i>       | 1.35                | 7.74   | 6.46    | 2.03x10 <sup>-08</sup> | 3.99x10 <sup>-06</sup> | 8.90    |
| <i>MXI1</i>         | 1.35                | 9.23   | 5.47    | 8.99x10 <sup>-07</sup> | 1.07x10 <sup>-04</sup> | 5.19    |
| <i>PDK4</i>         | 1.35                | 4.87   | 5.99    | 1.26x10 <sup>-07</sup> | 1.98x10 <sup>-05</sup> | 7.11    |
| <i>PTGFRN</i>       | 1.35                | 7.76   | 4.41    | 4.26x10 <sup>-05</sup> | 2.87x10 <sup>-03</sup> | 1.45    |
| <i>PLEKHA5</i>      | 1.35                | 6.53   | 12.48   | 2.14x10 <sup>-18</sup> | 7.15x10 <sup>-15</sup> | 31.57   |
| <i>ST6GALNAC3</i>   | 1.35                | 4.83   | 5.11    | 3.40x10 <sup>-06</sup> | 3.30x10 <sup>-04</sup> | 3.89    |
| <i>LPCAT1</i>       | 1.35                | 8.70   | 6.91    | 3.35x10 <sup>-09</sup> | 8.28x10 <sup>-07</sup> | 10.68   |
| <i>MAP3K1</i>       | 1.34                | 5.72   | 8.89    | 1.37x10 <sup>-12</sup> | 9.33x10 <sup>-10</sup> | 18.37   |
| <i>ANAPC16</i>      | 1.34                | 8.65   | 7.17    | 1.20x10 <sup>-09</sup> | 3.38x10 <sup>-07</sup> | 11.69   |
| <i>HPSE</i>         | 1.34                | 5.30   | 6.19    | 5.62x10 <sup>-08</sup> | 9.83x10 <sup>-06</sup> | 7.90    |
| <i>CHST6</i>        | 1.34                | 6.01   | 5.22    | 2.33x10 <sup>-06</sup> | 2.39x10 <sup>-04</sup> | 4.26    |
| <i>UBE2QL1</i>      | 1.34                | 6.12   | 4.25    | 7.60x10 <sup>-05</sup> | 4.70x10 <sup>-03</sup> | 0.89    |
| <i>TAPT1-AS1</i>    | 1.34                | 5.13   | 5.66    | 4.39x10 <sup>-07</sup> | 5.79x10 <sup>-05</sup> | 5.89    |
| <i>CLEC5A</i>       | 1.34                | 4.51   | 4.73    | 1.40x10 <sup>-05</sup> | 1.10x10 <sup>-03</sup> | 2.52    |
| <i>PCDHB14</i>      | 1.34                | 5.38   | 4.23    | 7.93x10 <sup>-05</sup> | 4.87x10 <sup>-03</sup> | 0.85    |
| <i>CLEC14A</i>      | 1.34                | 6.66   | 7.86    | 7.97x10 <sup>-11</sup> | 3.18x10 <sup>-08</sup> | 14.36   |
| <i>P2RY8</i>        | 1.33                | 5.49   | 5.53    | 7.09x10 <sup>-07</sup> | 8.72x10 <sup>-05</sup> | 5.42    |
| <i>ABCA1</i>        | 1.33                | 6.27   | 7.49    | 3.45x10 <sup>-10</sup> | 1.12x10 <sup>-07</sup> | 12.92   |
| <i>RPS6KA3</i>      | 1.33                | 8.23   | 8.31    | 1.35x10 <sup>-11</sup> | 6.80x10 <sup>-09</sup> | 16.11   |
| <i>TMEM38B</i>      | 1.33                | 6.95   | 5.33    | 1.54x10 <sup>-06</sup> | 1.68x10 <sup>-04</sup> | 4.67    |
| <i>EPHA3</i>        | 1.33                | 5.18   | 5.02    | 4.85x10 <sup>-06</sup> | 4.46x10 <sup>-04</sup> | 3.55    |
| <i>HPGDS</i>        | 1.33                | 5.49   | 4.93    | 6.68x10 <sup>-06</sup> | 5.84x10 <sup>-04</sup> | 3.24    |
| <i>HHEX</i>         | 1.33                | 5.61   | 6.93    | 3.12x10 <sup>-09</sup> | 7.80x10 <sup>-07</sup> | 10.75   |
| <i>COL1A2</i>       | 1.33                | 12.97  | 6.40    | 2.55x10 <sup>-08</sup> | 4.91x10 <sup>-06</sup> | 8.68    |
| <i>TPRKB</i>        | 1.32                | 8.86   | 5.02    | 4.84x10 <sup>-06</sup> | 4.46x10 <sup>-04</sup> | 3.55    |
| <i>SNORD89</i>      | 1.32                | 6.22   | 6.94    | 2.99x10 <sup>-09</sup> | 7.56x10 <sup>-07</sup> | 10.79   |
| <i>PFDN5</i>        | 1.32                | 11.31  | 7.81    | 9.66x10 <sup>-11</sup> | 3.78x10 <sup>-08</sup> | 14.17   |
| <i>TBX15</i>        | 1.32                | 6.51   | 6.05    | 9.91x10 <sup>-08</sup> | 1.61x10 <sup>-05</sup> | 7.35    |
| <i>EBAG9</i>        | 1.32                | 8.01   | 6.46    | 2.02x10 <sup>-08</sup> | 3.98x10 <sup>-06</sup> | 8.91    |
| <i>PAN2</i>         | 1.32                | 6.56   | 5.27    | 1.91x10 <sup>-06</sup> | 2.02x10 <sup>-04</sup> | 4.45    |
| <i>WNK3</i>         | 1.32                | 5.34   | 5.49    | 8.37x10 <sup>-07</sup> | 1.01x10 <sup>-04</sup> | 5.26    |
| <i>IQGAP2</i>       | 1.31                | 4.91   | 8.29    | 1.47x10 <sup>-11</sup> | 7.28x10 <sup>-09</sup> | 16.03   |
| <i>RASEF</i>        | 1.31                | 5.73   | 6.48    | 1.84x10 <sup>-08</sup> | 3.65x10 <sup>-06</sup> | 9.00    |
| <i>LOC101927451</i> | 1.31                | 5.61   | 6.16    | 6.36x10 <sup>-08</sup> | 1.10x10 <sup>-05</sup> | 7.78    |
| <i>RNF125</i>       | 1.31                | 4.56   | 5.60    | 5.56x10 <sup>-07</sup> | 7.10x10 <sup>-05</sup> | 5.66    |
| <i>ZNF721</i>       | 1.31                | 9.03   | 8.89    | 1.38x10 <sup>-12</sup> | 9.33x10 <sup>-10</sup> | 18.37   |
| <i>PTPRO</i>        | 1.31                | 6.57   | 10.44   | 3.64x10 <sup>-15</sup> | 4.88x10 <sup>-12</sup> | 24.23   |
| <i>RAMP3</i>        | 1.31                | 6.60   | 5.12    | 3.31x10 <sup>-06</sup> | 3.23x10 <sup>-04</sup> | 3.92    |
| <i>RPS27</i>        | 1.30                | 9.73   | 7.16    | 1.29x10 <sup>-09</sup> | 3.59x10 <sup>-07</sup> | 11.62   |
| <i>MTERF2</i>       | 1.30                | 6.20   | 6.46    | 1.99x10 <sup>-08</sup> | 3.91x10 <sup>-06</sup> | 8.92    |
| <i>LINC01003</i>    | 1.30                | 6.01   | 4.48    | 3.38x10 <sup>-05</sup> | 2.34x10 <sup>-03</sup> | 1.67    |
| <i>SASH3</i>        | 1.30                | 6.16   | 4.87    | 8.38x10 <sup>-06</sup> | 7.12x10 <sup>-04</sup> | 3.02    |
| <i>FYB1</i>         | 1.30                | 5.37   | 5.48    | 8.62x10 <sup>-07</sup> | 1.03x10 <sup>-04</sup> | 5.23    |

Table SII. Continued.

| Gene symbol         | log <sub>2</sub> FC | AveExp | t-score | P-value                | P <sup>adj</sup>       | B-value |
|---------------------|---------------------|--------|---------|------------------------|------------------------|---------|
| <i>ABCB4</i>        | 1.30                | 5.13   | 5.85    | 2.13x10 <sup>-07</sup> | 3.11x10 <sup>-05</sup> | 6.60    |
| <i>DENND1B</i>      | 1.30                | 5.55   | 9.11    | 5.82x10 <sup>-13</sup> | 4.42x10 <sup>-10</sup> | 19.22   |
| <i>LOC389765</i>    | 1.29                | 4.80   | 4.96    | 5.99x10 <sup>-06</sup> | 5.32x10 <sup>-04</sup> | 3.34    |
| <i>KIAA1551</i>     | 1.29                | 5.98   | 6.28    | 4.01x10 <sup>-08</sup> | 7.28x10 <sup>-06</sup> | 8.23    |
| <i>MCM3</i>         | 1.29                | 8.79   | 5.15    | 2.96x10 <sup>-06</sup> | 2.92x10 <sup>-04</sup> | 4.03    |
| <i>WSB1</i>         | 1.29                | 7.49   | 6.32    | 3.50x10 <sup>-08</sup> | 6.46x10 <sup>-06</sup> | 8.37    |
| <i>ATP5ME</i>       | 1.29                | 10.37  | 5.76    | 3.04x10 <sup>-07</sup> | 4.21x10 <sup>-05</sup> | 6.25    |
| <i>MPPED2</i>       | 1.29                | 4.82   | 4.97    | 5.79x10 <sup>-06</sup> | 5.17x10 <sup>-04</sup> | 3.38    |
| <i>LST1</i>         | 1.29                | 6.67   | 6.83    | 4.65x10 <sup>-09</sup> | 1.11x10 <sup>-06</sup> | 10.35   |
| <i>C12orf57</i>     | 1.29                | 10.71  | 5.04    | 4.55x10 <sup>-06</sup> | 4.22x10 <sup>-04</sup> | 3.61    |
| <i>PDIK1L</i>       | 1.29                | 6.85   | 5.17    | 2.80x10 <sup>-06</sup> | 2.80x10 <sup>-04</sup> | 4.08    |
| <i>IFNGR1</i>       | 1.29                | 7.96   | 7.85    | 8.40x10 <sup>-11</sup> | 3.33x10 <sup>-08</sup> | 14.31   |
| <i>LOC100996756</i> | 1.29                | 5.52   | 5.08    | 3.90x10 <sup>-06</sup> | 3.71x10 <sup>-04</sup> | 3.76    |
| <i>RGL1</i>         | 1.29                | 9.32   | 6.01    | 1.16x10 <sup>-07</sup> | 1.85x10 <sup>-05</sup> | 7.19    |
| <i>KLHL15</i>       | 1.29                | 7.21   | 4.46    | 3.66x10 <sup>-05</sup> | 2.51x10 <sup>-03</sup> | 1.59    |
| <i>PLCL2</i>        | 1.29                | 5.55   | 10.34   | 5.22x10 <sup>-15</sup> | 6.70x10 <sup>-12</sup> | 23.88   |
| <i>LIPA</i>         | 1.28                | 10.28  | 6.48    | 1.84x10 <sup>-08</sup> | 3.64x10 <sup>-06</sup> | 9.00    |
| <i>RNPC3</i>        | 1.28                | 6.18   | 8.64    | 3.72x10 <sup>-12</sup> | 2.26x10 <sup>-09</sup> | 17.39   |
| <i>JAG2</i>         | 1.28                | 6.91   | 6.58    | 1.26x10 <sup>-08</sup> | 2.62x10 <sup>-06</sup> | 9.37    |
| <i>HIST1H2BE</i>    | 1.28                | 6.84   | 4.31    | 6.20x10 <sup>-05</sup> | 3.95x10 <sup>-03</sup> | 1.09    |
| <i>PSAP</i>         | 1.28                | 11.28  | 5.99    | 1.24x10 <sup>-07</sup> | 1.94x10 <sup>-05</sup> | 7.13    |
| <i>LINC01560</i>    | 1.28                | 4.94   | 5.05    | 4.32x10 <sup>-06</sup> | 4.03x10 <sup>-04</sup> | 3.66    |
| <i>NRARP</i>        | 1.27                | 6.49   | 9.25    | 3.42x10 <sup>-13</sup> | 2.79x10 <sup>-10</sup> | 19.74   |
| <i>KYNU</i>         | 1.27                | 5.43   | 5.49    | 8.47x10 <sup>-07</sup> | 1.02x10 <sup>-04</sup> | 5.25    |
| <i>ITPR1</i>        | 1.27                | 5.78   | 5.15    | 2.99x10 <sup>-06</sup> | 2.95x10 <sup>-04</sup> | 4.02    |
| <i>C1orf112</i>     | 1.27                | 5.69   | 4.85    | 8.96x10 <sup>-06</sup> | 7.55x10 <sup>-04</sup> | 2.95    |
| <i>ZBTB8A</i>       | 1.27                | 8.56   | 4.43    | 4.03x10 <sup>-05</sup> | 2.73x10 <sup>-03</sup> | 1.50    |
| <i>NIPBL</i>        | 1.27                | 7.50   | 8.48    | 6.87x10 <sup>-12</sup> | 3.76x10 <sup>-09</sup> | 16.78   |
| <i>TIE1</i>         | 1.27                | 4.69   | 10.93   | 5.85x10 <sup>-16</sup> | 1.02x10 <sup>-12</sup> | 26.04   |
| <i>VWF</i>          | 1.27                | 6.53   | 6.45    | 2.11x10 <sup>-08</sup> | 4.11x10 <sup>-06</sup> | 8.87    |
| <i>LGALS1</i>       | 1.27                | 6.71   | 7.59    | 2.34x10 <sup>-10</sup> | 7.94x10 <sup>-08</sup> | 13.30   |
| <i>ND2</i>          | 1.27                | 13.14  | 6.45    | 2.03x10 <sup>-08</sup> | 4.00x10 <sup>-06</sup> | 8.90    |
| <i>DLEU2</i>        | 1.27                | 5.16   | 9.07    | 6.87x10 <sup>-13</sup> | 5.10x10 <sup>-10</sup> | 19.06   |
| <i>LAIR1</i>        | 1.27                | 6.55   | 6.51    | 1.66x10 <sup>-08</sup> | 3.33x10 <sup>-06</sup> | 9.10    |
| <i>GRK3</i>         | 1.27                | 6.22   | 6.60    | 1.14x10 <sup>-08</sup> | 2.42x10 <sup>-06</sup> | 9.47    |
| <i>FRMD4B</i>       | 1.27                | 4.49   | 13.02   | 3.25x10 <sup>-19</sup> | 1.47x10 <sup>-15</sup> | 33.43   |
| <i>KIAA0040</i>     | 1.26                | 6.33   | 5.09    | 3.67x10 <sup>-06</sup> | 3.53x10 <sup>-04</sup> | 3.82    |
| <i>COL27A1</i>      | 1.26                | 6.46   | 5.37    | 1.32x10 <sup>-06</sup> | 1.46x10 <sup>-04</sup> | 4.82    |
| <i>METTL7A</i>      | 1.26                | 6.37   | 8.13    | 2.77x10 <sup>-11</sup> | 1.26x10 <sup>-08</sup> | 15.40   |
| <i>VAV3</i>         | 1.26                | 5.01   | 7.17    | 1.20x10 <sup>-09</sup> | 3.39x10 <sup>-07</sup> | 11.69   |
| <i>NACA</i>         | 1.26                | 10.63  | 9.09    | 6.48x10 <sup>-13</sup> | 4.88x10 <sup>-10</sup> | 19.11   |
| <i>FAM69C</i>       | 1.26                | 6.83   | 4.44    | 3.92x10 <sup>-05</sup> | 2.66x10 <sup>-03</sup> | 1.53    |
| <i>TTC14</i>        | 1.26                | 6.38   | 7.69    | 1.57x10 <sup>-10</sup> | 5.71x10 <sup>-08</sup> | 13.69   |
| <i>I-Mar</i>        | 1.26                | 5.13   | 5.60    | 5.59x10 <sup>-07</sup> | 7.12x10 <sup>-05</sup> | 5.65    |
| <i>MSR1</i>         | 1.26                | 5.11   | 7.19    | 1.11x10 <sup>-09</sup> | 3.17x10 <sup>-07</sup> | 11.76   |
| <i>SATB1</i>        | 1.26                | 5.94   | 6.91    | 3.41x10 <sup>-09</sup> | 8.42x10 <sup>-07</sup> | 10.66   |
| <i>KDM7A</i>        | 1.25                | 5.91   | 6.62    | 1.05x10 <sup>-08</sup> | 2.26x10 <sup>-06</sup> | 9.56    |
| <i>CD163L1</i>      | 1.25                | 6.66   | 4.15    | 1.05x10 <sup>-04</sup> | 6.20x10 <sup>-03</sup> | 0.58    |
| <i>NOP58</i>        | 1.25                | 10.44  | 6.59    | 1.19x10 <sup>-08</sup> | 2.51x10 <sup>-06</sup> | 9.43    |

Table SII. Continued.

| Gene symbol         | log <sub>2</sub> FC | AveExp | t-score | P-value                | P <sup>adj</sup>       | B-value |
|---------------------|---------------------|--------|---------|------------------------|------------------------|---------|
| <i>LARP7</i>        | 1.25                | 6.25   | 9.89    | 2.89x10 <sup>-14</sup> | 3.12x10 <sup>-11</sup> | 22.19   |
| <i>CARD8-AS1</i>    | 1.25                | 5.42   | 7.93    | 6.07x10 <sup>-11</sup> | 2.49x10 <sup>-08</sup> | 14.63   |
| <i>PBX1</i>         | 1.25                | 7.05   | 5.27    | 1.89x10 <sup>-06</sup> | 2.00x10 <sup>-04</sup> | 4.47    |
| <i>SLC16A14</i>     | 1.25                | 4.67   | 5.20    | 2.50x10 <sup>-06</sup> | 2.53x10 <sup>-04</sup> | 4.19    |
| <i>TERF1</i>        | 1.25                | 7.95   | 7.55    | 2.72x10 <sup>-10</sup> | 9.08x10 <sup>-08</sup> | 13.15   |
| <i>TDRD3</i>        | 1.25                | 6.56   | 4.76    | 1.25x10 <sup>-05</sup> | 9.96x10 <sup>-04</sup> | 2.63    |
| <i>BMP2K</i>        | 1.25                | 5.83   | 7.92    | 6.22x10 <sup>-11</sup> | 2.54x10 <sup>-08</sup> | 14.60   |
| <i>UBA52</i>        | 1.25                | 12.29  | 7.67    | 1.68x10 <sup>-10</sup> | 6.02x10 <sup>-08</sup> | 13.62   |
| <i>LCP2</i>         | 1.25                | 4.89   | 7.22    | 1.01x10 <sup>-09</sup> | 2.93x10 <sup>-07</sup> | 11.86   |
| <i>ETS2</i>         | 1.25                | 5.85   | 8.65    | 3.55x10 <sup>-12</sup> | 2.17x10 <sup>-09</sup> | 17.43   |
| <i>FCGRT</i>        | 1.25                | 8.70   | 5.94    | 1.50x10 <sup>-07</sup> | 2.29x10 <sup>-05</sup> | 6.94    |
| <i>PIK3C2B</i>      | 1.24                | 7.39   | 6.13    | 7.09x10 <sup>-08</sup> | 1.20x10 <sup>-05</sup> | 7.68    |
| <i>LOC728613</i>    | 1.24                | 6.22   | 5.44    | 9.99x10 <sup>-07</sup> | 1.17x10 <sup>-04</sup> | 5.09    |
| <i>SEMA4D</i>       | 1.24                | 5.37   | 5.47    | 8.96x10 <sup>-07</sup> | 1.06x10 <sup>-04</sup> | 5.19    |
| <i>TRAPPC10</i>     | 1.24                | 5.91   | 7.29    | 7.55x10 <sup>-10</sup> | 2.27x10 <sup>-07</sup> | 12.14   |
| <i>RWDD3</i>        | 1.24                | 8.43   | 5.09    | 3.72x10 <sup>-06</sup> | 3.57x10 <sup>-04</sup> | 3.81    |
| <i>NR1H3</i>        | 1.24                | 5.90   | 4.94    | 6.51x10 <sup>-06</sup> | 5.71x10 <sup>-04</sup> | 3.26    |
| <i>RB1CC1</i>       | 1.24                | 8.78   | 6.72    | 7.25x10 <sup>-09</sup> | 1.64x10 <sup>-06</sup> | 9.92    |
| <i>MYO1F</i>        | 1.24                | 6.60   | 4.99    | 5.29x10 <sup>-06</sup> | 4.79x10 <sup>-04</sup> | 3.47    |
| <i>RPL23AP32</i>    | 1.24                | 6.38   | 6.61    | 1.12x10 <sup>-08</sup> | 2.39x10 <sup>-06</sup> | 9.49    |
| <i>CEP68</i>        | 1.24                | 6.55   | 9.45    | 1.56x10 <sup>-13</sup> | 1.36x10 <sup>-10</sup> | 20.52   |
| <i>RTP4</i>         | 1.24                | 5.39   | 4.36    | 5.20x10 <sup>-05</sup> | 3.41x10 <sup>-03</sup> | 1.26    |
| <i>S1PR3</i>        | 1.24                | 7.64   | 4.85    | 9.11x10 <sup>-06</sup> | 7.66x10 <sup>-04</sup> | 2.94    |
| <i>DDX60L</i>       | 1.24                | 6.14   | 8.02    | 4.27x10 <sup>-11</sup> | 1.86x10 <sup>-08</sup> | 14.98   |
| <i>WDR11</i>        | 1.24                | 7.78   | 6.87    | 4.01x10 <sup>-09</sup> | 9.72x10 <sup>-07</sup> | 10.50   |
| <i>PRR11</i>        | 1.24                | 10.08  | 6.47    | 1.93x10 <sup>-08</sup> | 3.82x10 <sup>-06</sup> | 8.95    |
| <i>SLC37A2</i>      | 1.24                | 6.04   | 4.64    | 1.91x10 <sup>-05</sup> | 1.44x10 <sup>-03</sup> | 2.22    |
| <i>DDIT3</i>        | 1.24                | 8.50   | 4.33    | 5.69x10 <sup>-05</sup> | 3.67x10 <sup>-03</sup> | 1.17    |
| <i>GABRB2</i>       | 1.24                | 5.57   | 5.34    | 1.46x10 <sup>-06</sup> | 1.60x10 <sup>-04</sup> | 4.72    |
| <i>RETREG1</i>      | 1.24                | 4.97   | 6.39    | 2.58x10 <sup>-08</sup> | 4.96x10 <sup>-06</sup> | 8.67    |
| <i>FAM49A</i>       | 1.24                | 5.32   | 8.04    | 3.94x10 <sup>-11</sup> | 1.73x10 <sup>-08</sup> | 15.06   |
| <i>SNRPD2</i>       | 1.24                | 11.33  | 4.82    | 9.93x10 <sup>-06</sup> | 8.22x10 <sup>-04</sup> | 2.85    |
| <i>VPS13C</i>       | 1.23                | 5.93   | 10.78   | 1.01x10 <sup>-15</sup> | 1.65x10 <sup>-12</sup> | 25.50   |
| <i>PAPD4</i>        | 1.23                | 6.72   | 5.98    | 1.29x10 <sup>-07</sup> | 2.01x10 <sup>-05</sup> | 7.09    |
| <i>BTG1</i>         | 1.23                | 8.38   | 8.92    | 1.22x10 <sup>-12</sup> | 8.50x10 <sup>-10</sup> | 18.48   |
| <i>FANCL</i>        | 1.23                | 7.98   | 4.52    | 2.96x10 <sup>-05</sup> | 2.09x10 <sup>-03</sup> | 1.80    |
| <i>ZCCHC7</i>       | 1.23                | 6.30   | 7.46    | 3.94x10 <sup>-10</sup> | 1.26x10 <sup>-07</sup> | 12.78   |
| <i>OXR1</i>         | 1.23                | 7.06   | 5.80    | 2.55x10 <sup>-07</sup> | 3.62x10 <sup>-05</sup> | 6.42    |
| <i>ZNF608</i>       | 1.22                | 5.63   | 7.95    | 5.61x10 <sup>-11</sup> | 2.36x10 <sup>-08</sup> | 14.71   |
| <i>TMEM241</i>      | 1.22                | 8.47   | 7.85    | 8.13x10 <sup>-11</sup> | 3.23x10 <sup>-08</sup> | 14.34   |
| <i>HES4</i>         | 1.22                | 6.83   | 4.63    | 1.95x10 <sup>-05</sup> | 1.47x10 <sup>-03</sup> | 2.20    |
| <i>POT1</i>         | 1.22                | 7.48   | 5.61    | 5.41x10 <sup>-07</sup> | 6.92x10 <sup>-05</sup> | 5.69    |
| <i>SMIM19</i>       | 1.22                | 9.17   | 5.07    | 4.01x10 <sup>-06</sup> | 3.79x10 <sup>-04</sup> | 3.73    |
| <i>N4BP2L2</i>      | 1.22                | 6.81   | 6.34    | 3.14x10 <sup>-08</sup> | 5.89x10 <sup>-06</sup> | 8.47    |
| <i>ZNF207</i>       | 1.22                | 7.37   | 9.51    | 1.24x10 <sup>-13</sup> | 1.12x10 <sup>-10</sup> | 20.75   |
| <i>SUZ12P1</i>      | 1.22                | 5.03   | 7.21    | 1.03x10 <sup>-09</sup> | 2.97x10 <sup>-07</sup> | 11.84   |
| <i>RPS6KA1</i>      | 1.22                | 5.36   | 5.57    | 6.09x10 <sup>-07</sup> | 7.63x10 <sup>-05</sup> | 5.57    |
| <i>CREG1</i>        | 1.22                | 10.38  | 4.44    | 3.82x10 <sup>-05</sup> | 2.61x10 <sup>-03</sup> | 1.55    |
| <i>LOC100287896</i> | 1.22                | 5.36   | 4.66    | 1.81x10 <sup>-05</sup> | 1.37x10 <sup>-03</sup> | 2.27    |

Table SII. Continued.

| Gene symbol      | log <sub>2</sub> FC | AveExp | t-score | P-value                | P <sup>adj</sup>       | B-value |
|------------------|---------------------|--------|---------|------------------------|------------------------|---------|
| <i>ISG20</i>     | 1.22                | 6.35   | 4.58    | 2.38x10 <sup>-05</sup> | 1.73x10 <sup>-03</sup> | 2.01    |
| <i>COA5</i>      | 1.22                | 7.71   | 6.98    | 2.59x10 <sup>-09</sup> | 6.67x10 <sup>-07</sup> | 10.93   |
| <i>RAB33B</i>    | 1.22                | 6.32   | 6.12    | 7.44x10 <sup>-08</sup> | 1.25x10 <sup>-05</sup> | 7.63    |
| <i>ADAMTS9</i>   | 1.22                | 5.72   | 6.52    | 1.59x10 <sup>-08</sup> | 3.20x10 <sup>-06</sup> | 9.15    |
| <i>BIRC3</i>     | 1.22                | 5.02   | 4.06    | 1.45x10 <sup>-04</sup> | 8.19x10 <sup>-03</sup> | 0.27    |
| <i>TNIK</i>      | 1.22                | 5.74   | 6.84    | 4.52x10 <sup>-09</sup> | 1.08x10 <sup>-06</sup> | 10.38   |
| <i>LAMTOR2</i>   | 1.21                | 8.36   | 5.83    | 2.33x10 <sup>-07</sup> | 3.36x10 <sup>-05</sup> | 6.51    |
| <i>GJA4</i>      | 1.21                | 6.37   | 6.77    | 5.86x10 <sup>-09</sup> | 1.36x10 <sup>-06</sup> | 10.12   |
| <i>ZNF493</i>    | 1.21                | 5.46   | 8.63    | 3.82x10 <sup>-12</sup> | 2.30x10 <sup>-09</sup> | 17.36   |
| <i>NRDC</i>      | 1.21                | 8.00   | 7.29    | 7.73x10 <sup>-10</sup> | 2.31x10 <sup>-07</sup> | 12.12   |
| <i>PDE4DIP</i>   | 1.21                | 6.38   | 4.98    | 5.64x10 <sup>-06</sup> | 5.06x10 <sup>-04</sup> | 3.40    |
| <i>ZNF595</i>    | 1.21                | 4.61   | 5.55    | 6.67x10 <sup>-07</sup> | 8.24x10 <sup>-05</sup> | 5.48    |
| <i>OTUD6B</i>    | 1.21                | 7.12   | 5.38    | 1.25x10 <sup>-06</sup> | 1.40x10 <sup>-04</sup> | 4.87    |
| <i>RBBP4</i>     | 1.21                | 7.28   | 6.80    | 5.23x10 <sup>-09</sup> | 1.22x10 <sup>-06</sup> | 10.24   |
| <i>FUBP1</i>     | 1.21                | 6.67   | 7.74    | 1.27x10 <sup>-10</sup> | 4.75x10 <sup>-08</sup> | 13.90   |
| <i>TLR5</i>      | 1.21                | 6.15   | 5.89    | 1.83x10 <sup>-07</sup> | 2.72x10 <sup>-05</sup> | 6.75    |
| <i>DNAAF2</i>    | 1.20                | 7.04   | 5.70    | 3.83x10 <sup>-07</sup> | 5.16x10 <sup>-05</sup> | 6.02    |
| <i>LOC153684</i> | 1.20                | 7.01   | 6.29    | 3.90x10 <sup>-08</sup> | 7.11x10 <sup>-06</sup> | 8.26    |
| <i>TBC1D4</i>    | 1.20                | 7.79   | 6.41    | 2.44x10 <sup>-08</sup> | 4.71x10 <sup>-06</sup> | 8.72    |
| <i>LINS1</i>     | 1.20                | 5.83   | 6.71    | 7.41x10 <sup>-09</sup> | 1.67x10 <sup>-06</sup> | 9.89    |
| <i>RBM6</i>      | 1.20                | 6.65   | 6.72    | 7.29x10 <sup>-09</sup> | 1.65x10 <sup>-06</sup> | 9.91    |
| <i>GMCL1</i>     | 1.20                | 6.96   | 5.48    | 8.64x10 <sup>-07</sup> | 1.03x10 <sup>-04</sup> | 5.23    |
| <i>NPIP15</i>    | 1.20                | 6.54   | 5.60    | 5.58x10 <sup>-07</sup> | 7.11x10 <sup>-05</sup> | 5.66    |
| <i>SPNS2</i>     | 1.20                | 6.53   | 5.51    | 7.83x10 <sup>-07</sup> | 9.50x10 <sup>-05</sup> | 5.32    |
| <i>C11orf54</i>  | 1.20                | 6.56   | 8.38    | 1.03x10 <sup>-11</sup> | 5.33x10 <sup>-09</sup> | 16.38   |
| <i>ZNF140</i>    | 1.20                | 6.96   | 4.67    | 1.73x10 <sup>-05</sup> | 1.32x10 <sup>-03</sup> | 2.32    |
| <i>CD58</i>      | 1.20                | 6.36   | 7.25    | 8.86x10 <sup>-10</sup> | 2.61x10 <sup>-07</sup> | 11.98   |
| <i>SPTSSA</i>    | 1.20                | 8.15   | 5.92    | 1.62x10 <sup>-07</sup> | 2.45x10 <sup>-05</sup> | 6.87    |
| <i>DISP1</i>     | 1.20                | 6.09   | 5.91    | 1.69x10 <sup>-07</sup> | 2.54x10 <sup>-05</sup> | 6.82    |
| <i>PPP1CB</i>    | 1.20                | 10.00  | 6.56    | 1.33x10 <sup>-08</sup> | 2.74x10 <sup>-06</sup> | 9.32    |
| <i>RAPGEF2</i>   | 1.20                | 6.66   | 6.47    | 1.89x10 <sup>-08</sup> | 3.73x10 <sup>-06</sup> | 8.98    |
| <i>NHLRC3</i>    | 1.20                | 5.76   | 6.84    | 4.42x10 <sup>-09</sup> | 1.06x10 <sup>-06</sup> | 10.40   |
| <i>SMA4</i>      | 1.19                | 5.86   | 6.38    | 2.74x10 <sup>-08</sup> | 5.23x10 <sup>-06</sup> | 8.61    |
| <i>TTYH2</i>     | 1.19                | 6.11   | 7.84    | 8.68x10 <sup>-11</sup> | 3.42x10 <sup>-08</sup> | 14.28   |
| <i>GON7</i>      | 1.19                | 7.41   | 4.97    | 5.74x10 <sup>-06</sup> | 5.14x10 <sup>-04</sup> | 3.39    |
| <i>DAPK1-IT1</i> | 1.19                | 5.48   | 4.24    | 7.84x10 <sup>-05</sup> | 4.82x10 <sup>-03</sup> | 0.86    |
| <i>REL</i>       | 1.19                | 5.13   | 7.37    | 5.47x10 <sup>-10</sup> | 1.68x10 <sup>-07</sup> | 12.46   |
| <i>SRFBP1</i>    | 1.19                | 6.48   | 4.74    | 1.35x10 <sup>-05</sup> | 1.07x10 <sup>-03</sup> | 2.56    |
| <i>DRAM2</i>     | 1.19                | 7.99   | 7.39    | 5.05x10 <sup>-10</sup> | 1.56x10 <sup>-07</sup> | 12.54   |
| <i>SORL1</i>     | 1.19                | 5.73   | 5.27    | 1.92x10 <sup>-06</sup> | 2.02x10 <sup>-04</sup> | 4.45    |
| <i>EIF1AX</i>    | 1.19                | 9.28   | 6.04    | 1.02x10 <sup>-07</sup> | 1.65x10 <sup>-05</sup> | 7.32    |
| <i>PTRHD1</i>    | 1.19                | 9.18   | 5.46    | 9.26x10 <sup>-07</sup> | 1.09x10 <sup>-04</sup> | 5.16    |
| <i>NEMP1</i>     | 1.19                | 6.40   | 4.09    | 1.29x10 <sup>-04</sup> | 7.40x10 <sup>-03</sup> | 0.39    |
| <i>ROR2</i>      | 1.19                | 5.88   | 7.42    | 4.51x10 <sup>-10</sup> | 1.42x10 <sup>-07</sup> | 12.65   |
| <i>OPHN1</i>     | 1.18                | 10.19  | 6.91    | 3.47x10 <sup>-09</sup> | 8.53x10 <sup>-07</sup> | 10.64   |
| <i>CRTAM</i>     | 1.18                | 4.38   | 4.02    | 1.61x10 <sup>-04</sup> | 8.97x10 <sup>-03</sup> | 0.17    |
| <i>JUNB</i>      | 1.18                | 7.96   | 4.54    | 2.71x10 <sup>-05</sup> | 1.94x10 <sup>-03</sup> | 1.88    |
| <i>RNF19A</i>    | 1.18                | 7.30   | 6.92    | 3.29x10 <sup>-09</sup> | 8.16x10 <sup>-07</sup> | 10.69   |
| <i>ARRB2</i>     | 1.18                | 6.47   | 6.18    | 5.93x10 <sup>-08</sup> | 1.03x10 <sup>-05</sup> | 7.85    |

Table SII. Continued.

| Gene symbol       | log <sub>2</sub> FC | AveExp | t-score | P-value                | P <sup>adj</sup>       | B-value |
|-------------------|---------------------|--------|---------|------------------------|------------------------|---------|
| <i>ZNF195</i>     | 1.18                | 6.46   | 5.23    | 2.19x10 <sup>-06</sup> | 2.27x10 <sup>-04</sup> | 4.32    |
| <i>HAUS3</i>      | 1.18                | 7.26   | 5.85    | 2.16x10 <sup>-07</sup> | 3.14x10 <sup>-05</sup> | 6.59    |
| <i>COPS3</i>      | 1.18                | 9.51   | 3.99    | 1.80x10 <sup>-04</sup> | 9.80x10 <sup>-03</sup> | 0.07    |
| <i>FILIP1</i>     | 1.18                | 4.38   | 4.19    | 9.16x10 <sup>-05</sup> | 5.52x10 <sup>-03</sup> | 0.71    |
| <i>DNAJC7</i>     | 1.18                | 7.47   | 7.28    | 7.77x10 <sup>-10</sup> | 2.32x10 <sup>-07</sup> | 12.11   |
| <i>RPA3</i>       | 1.18                | 9.50   | 4.89    | 7.90x10 <sup>-06</sup> | 6.76x10 <sup>-04</sup> | 3.08    |
| <i>RSBN1</i>      | 1.18                | 7.29   | 6.98    | 2.62x10 <sup>-09</sup> | 6.75x10 <sup>-07</sup> | 10.92   |
| <i>DSN1</i>       | 1.18                | 7.14   | 4.84    | 9.36x10 <sup>-06</sup> | 7.83x10 <sup>-04</sup> | 2.91    |
| <i>F11R</i>       | 1.18                | 5.61   | 7.76    | 1.18x10 <sup>-10</sup> | 4.47x10 <sup>-08</sup> | 13.97   |
| <i>ELOA-AS1</i>   | 1.17                | 6.69   | 5.44    | 1.01x10 <sup>-06</sup> | 1.18x10 <sup>-04</sup> | 5.07    |
| <i>FASTKD1</i>    | 1.17                | 8.49   | 6.67    | 8.78x10 <sup>-09</sup> | 1.94x10 <sup>-06</sup> | 9.73    |
| <i>ZNF121</i>     | 1.17                | 8.71   | 5.98    | 1.30x10 <sup>-07</sup> | 2.02x10 <sup>-05</sup> | 7.08    |
| <i>DUS1L</i>      | 1.17                | 8.10   | 7.02    | 2.23x10 <sup>-09</sup> | 5.84x10 <sup>-07</sup> | 11.08   |
| <i>TLR7</i>       | 1.17                | 5.25   | 6.06    | 9.47x10 <sup>-08</sup> | 1.55x10 <sup>-05</sup> | 7.39    |
| <i>SND1-IT1</i>   | 1.17                | 6.55   | 5.59    | 5.71x10 <sup>-07</sup> | 7.24x10 <sup>-05</sup> | 5.63    |
| <i>TMA7</i>       | 1.17                | 12.25  | 6.80    | 5.24x10 <sup>-09</sup> | 1.23x10 <sup>-06</sup> | 10.23   |
| <i>JAM2</i>       | 1.17                | 6.90   | 4.07    | 1.37x10 <sup>-04</sup> | 7.81x10 <sup>-03</sup> | 0.32    |
| <i>SDHAF2</i>     | 1.17                | 7.56   | 6.79    | 5.41x10 <sup>-09</sup> | 1.26x10 <sup>-06</sup> | 10.20   |
| <i>PLEKHF2</i>    | 1.17                | 7.24   | 5.38    | 1.25x10 <sup>-06</sup> | 1.40x10 <sup>-04</sup> | 4.87    |
| <i>ZNF665</i>     | 1.17                | 7.92   | 7.58    | 2.42x10 <sup>-10</sup> | 8.15x10 <sup>-08</sup> | 13.26   |
| <i>STAB1</i>      | 1.17                | 5.97   | 7.75    | 1.22x10 <sup>-10</sup> | 4.62x10 <sup>-08</sup> | 13.94   |
| <i>GPX7</i>       | 1.17                | 8.26   | 4.24    | 7.87x10 <sup>-05</sup> | 4.84x10 <sup>-03</sup> | 0.86    |
| <i>PNISR</i>      | 1.17                | 7.25   | 6.74    | 6.76x10 <sup>-09</sup> | 1.54x10 <sup>-06</sup> | 9.98    |
| <i>SLC12A7</i>    | 1.17                | 9.02   | 5.84    | 2.18x10 <sup>-07</sup> | 3.17x10 <sup>-05</sup> | 6.58    |
| <i>DOCK8</i>      | 1.16                | 4.52   | 6.61    | 1.11x10 <sup>-08</sup> | 2.38x10 <sup>-06</sup> | 9.49    |
| <i>TPD52</i>      | 1.16                | 4.75   | 4.35    | 5.31x10 <sup>-05</sup> | 3.46x10 <sup>-03</sup> | 1.24    |
| <i>GABPB1-AS1</i> | 1.16                | 5.61   | 5.43    | 1.03x10 <sup>-06</sup> | 1.20x10 <sup>-04</sup> | 5.06    |
| <i>UBXN2A</i>     | 1.16                | 9.09   | 8.02    | 4.29x10 <sup>-11</sup> | 1.87x10 <sup>-08</sup> | 14.97   |
| <i>ANKRD49</i>    | 1.16                | 7.69   | 6.38    | 2.67x10 <sup>-08</sup> | 5.12x10 <sup>-06</sup> | 8.63    |
| <i>PCMTD2</i>     | 1.16                | 6.33   | 8.16    | 2.45x10 <sup>-11</sup> | 1.14x10 <sup>-08</sup> | 15.52   |
| <i>TCF7</i>       | 1.16                | 6.63   | 7.68    | 1.60x10 <sup>-10</sup> | 5.78x10 <sup>-08</sup> | 13.67   |
| <i>AHSA2P</i>     | 1.16                | 6.13   | 5.99    | 1.23x10 <sup>-07</sup> | 1.94x10 <sup>-05</sup> | 7.14    |
| <i>MYO1D</i>      | 1.16                | 5.23   | 5.29    | 1.80x10 <sup>-06</sup> | 1.92x10 <sup>-04</sup> | 4.51    |
| <i>CST3</i>       | 1.16                | 7.41   | 5.61    | 5.37x10 <sup>-07</sup> | 6.88x10 <sup>-05</sup> | 5.69    |
| <i>ITPR2</i>      | 1.16                | 5.82   | 6.72    | 7.17x10 <sup>-09</sup> | 1.63x10 <sup>-06</sup> | 9.93    |
| <i>PRKCH</i>      | 1.16                | 6.11   | 6.05    | 9.89x10 <sup>-08</sup> | 1.61x10 <sup>-05</sup> | 7.35    |
| <i>BTK</i>        | 1.15                | 5.24   | 5.61    | 5.37x10 <sup>-07</sup> | 6.88x10 <sup>-05</sup> | 5.69    |
| <i>SON</i>        | 1.15                | 9.41   | 8.20    | 2.06x10 <sup>-11</sup> | 9.89x10 <sup>-09</sup> | 15.69   |
| <i>LRRC15</i>     | 1.15                | 7.16   | 4.09    | 1.31x10 <sup>-04</sup> | 7.52x10 <sup>-03</sup> | 0.37    |
| <i>ANKRD10</i>    | 1.15                | 5.87   | 7.15    | 1.34x10 <sup>-09</sup> | 3.71x10 <sup>-07</sup> | 11.58   |
| <i>RPS7</i>       | 1.15                | 12.77  | 7.92    | 6.18x10 <sup>-11</sup> | 2.53x10 <sup>-08</sup> | 14.61   |
| <i>APOL6</i>      | 1.15                | 5.72   | 4.98    | 5.64x10 <sup>-06</sup> | 5.06x10 <sup>-04</sup> | 3.40    |
| <i>PREX1</i>      | 1.15                | 7.30   | 4.61    | 2.11x10 <sup>-05</sup> | 1.57x10 <sup>-03</sup> | 2.12    |
| <i>KCNE3</i>      | 1.15                | 5.46   | 11.57   | 5.48x10 <sup>-17</sup> | 1.30x10 <sup>-13</sup> | 28.37   |
| <i>INTS6L</i>     | 1.15                | 5.51   | 5.73    | 3.42x10 <sup>-07</sup> | 4.65x10 <sup>-05</sup> | 6.14    |
| <i>RBM39</i>      | 1.15                | 8.17   | 8.54    | 5.37x10 <sup>-12</sup> | 3.09x10 <sup>-09</sup> | 17.02   |
| <i>ACOT13</i>     | 1.15                | 8.17   | 5.18    | 2.69x10 <sup>-06</sup> | 2.70x10 <sup>-04</sup> | 4.12    |
| <i>CCNL2</i>      | 1.15                | 7.82   | 6.15    | 6.77x10 <sup>-08</sup> | 1.16x10 <sup>-05</sup> | 7.72    |
| <i>JTB</i>        | 1.15                | 11.48  | 7.16    | 1.29x10 <sup>-09</sup> | 3.59x10 <sup>-07</sup> | 11.62   |

Table SII. Continued.

| Gene symbol       | log <sub>2</sub> FC | AveExp | t-score | P-value                | P <sup>adj</sup>       | B-value |
|-------------------|---------------------|--------|---------|------------------------|------------------------|---------|
| <i>LPAR6</i>      | 1.15                | 5.92   | 10.75   | 1.11x10 <sup>-15</sup> | 1.76x10 <sup>-12</sup> | 25.40   |
| <i>ASAP1-IT1</i>  | 1.15                | 6.99   | 4.70    | 1.54x10 <sup>-05</sup> | 1.20x10 <sup>-03</sup> | 2.43    |
| <i>RPL23A</i>     | 1.15                | 13.52  | 6.89    | 3.65x10 <sup>-09</sup> | 8.93x10 <sup>-07</sup> | 10.59   |
| <i>ABCG1</i>      | 1.15                | 5.03   | 6.12    | 7.43x10 <sup>-08</sup> | 1.25x10 <sup>-05</sup> | 7.63    |
| <i>HLA-B</i>      | 1.15                | 11.91  | 5.46    | 9.49x10 <sup>-07</sup> | 1.11x10 <sup>-04</sup> | 5.14    |
| <i>TAF12</i>      | 1.15                | 7.64   | 5.62    | 5.17x10 <sup>-07</sup> | 6.66x10 <sup>-05</sup> | 5.73    |
| <i>ZNF184</i>     | 1.14                | 6.87   | 4.08    | 1.33x10 <sup>-04</sup> | 7.64x10 <sup>-03</sup> | 0.35    |
| <i>BAZ2B</i>      | 1.14                | 7.86   | 5.50    | 7.99x10 <sup>-07</sup> | 9.68x10 <sup>-05</sup> | 5.31    |
| <i>FGFR1</i>      | 1.14                | 7.75   | 6.56    | 1.35x10 <sup>-08</sup> | 2.78x10 <sup>-06</sup> | 9.30    |
| <i>ZNF791</i>     | 1.14                | 7.98   | 5.43    | 1.06x10 <sup>-06</sup> | 1.23x10 <sup>-04</sup> | 5.03    |
| <i>RPS6KA5</i>    | 1.14                | 5.05   | 6.58    | 1.26x10 <sup>-08</sup> | 2.62x10 <sup>-06</sup> | 9.37    |
| <i>GLMN</i>       | 1.14                | 6.95   | 5.25    | 2.09x10 <sup>-06</sup> | 2.18x10 <sup>-04</sup> | 4.37    |
| <i>SMC4</i>       | 1.14                | 8.07   | 5.39    | 1.23x10 <sup>-06</sup> | 1.39x10 <sup>-04</sup> | 4.88    |
| <i>PALD1</i>      | 1.14                | 5.89   | 6.18    | 5.94x10 <sup>-08</sup> | 1.03x10 <sup>-05</sup> | 7.85    |
| <i>C9orf64</i>    | 1.14                | 9.05   | 7.31    | 7.14x10 <sup>-10</sup> | 2.15x10 <sup>-07</sup> | 12.20   |
| <i>ELF2</i>       | 1.14                | 7.51   | 9.80    | 4.15x10 <sup>-14</sup> | 4.33x10 <sup>-11</sup> | 21.83   |
| <i>DMTF1</i>      | 1.14                | 8.62   | 6.63    | 1.04x10 <sup>-08</sup> | 2.24x10 <sup>-06</sup> | 9.56    |
| <i>SP110</i>      | 1.14                | 7.22   | 4.51    | 3.01x10 <sup>-05</sup> | 2.12x10 <sup>-03</sup> | 1.78    |
| <i>TBRG1</i>      | 1.14                | 6.27   | 6.75    | 6.49x10 <sup>-09</sup> | 1.49x10 <sup>-06</sup> | 10.02   |
| <i>APOL3</i>      | 1.14                | 5.39   | 4.21    | 8.47x10 <sup>-05</sup> | 5.15x10 <sup>-03</sup> | 0.79    |
| <i>INTS8</i>      | 1.13                | 9.06   | 5.66    | 4.31x10 <sup>-07</sup> | 5.70x10 <sup>-05</sup> | 5.91    |
| <i>ZNF862</i>     | 1.13                | 6.46   | 6.94    | 3.02x10 <sup>-09</sup> | 7.60x10 <sup>-07</sup> | 10.78   |
| <i>MKNK1</i>      | 1.13                | 6.59   | 8.72    | 2.68x10 <sup>-12</sup> | 1.69x10 <sup>-09</sup> | 17.71   |
| <i>RIN2</i>       | 1.13                | 7.44   | 6.38    | 2.76x10 <sup>-08</sup> | 5.28x10 <sup>-06</sup> | 8.60    |
| <i>HSPB11</i>     | 1.13                | 7.81   | 5.16    | 2.83x10 <sup>-06</sup> | 2.82x10 <sup>-04</sup> | 4.07    |
| <i>CPQ</i>        | 1.13                | 8.58   | 5.44    | 1.02x10 <sup>-06</sup> | 1.19x10 <sup>-04</sup> | 5.07    |
| <i>TIA1</i>       | 1.13                | 6.96   | 8.01    | 4.33x10 <sup>-11</sup> | 1.88x10 <sup>-08</sup> | 14.96   |
| <i>DDX5</i>       | 1.13                | 7.26   | 4.68    | 1.67x10 <sup>-05</sup> | 1.29x10 <sup>-03</sup> | 2.35    |
| <i>CDKN1C</i>     | 1.13                | 5.59   | 5.11    | 3.46x10 <sup>-06</sup> | 3.35x10 <sup>-04</sup> | 3.88    |
| <i>CYSLTR1</i>    | 1.12                | 4.59   | 5.43    | 1.03x10 <sup>-06</sup> | 1.20x10 <sup>-04</sup> | 5.06    |
| <i>SETBP1</i>     | 1.12                | 6.93   | 4.83    | 9.83x10 <sup>-06</sup> | 8.16x10 <sup>-04</sup> | 2.86    |
| <i>CSGALNACT1</i> | 1.12                | 6.44   | 5.10    | 3.65x10 <sup>-06</sup> | 3.52x10 <sup>-04</sup> | 3.83    |
| <i>GULP1</i>      | 1.12                | 6.02   | 5.26    | 2.01x10 <sup>-06</sup> | 2.11x10 <sup>-04</sup> | 4.41    |
| <i>LHX2</i>       | 1.12                | 4.78   | 4.15    | 1.06x10 <sup>-04</sup> | 6.24x10 <sup>-03</sup> | 0.58    |
| <i>MOB3B</i>      | 1.12                | 5.79   | 6.96    | 2.85x10 <sup>-09</sup> | 7.25x10 <sup>-07</sup> | 10.83   |
| <i>BANF1</i>      | 1.12                | 10.36  | 6.08    | 8.79x10 <sup>-08</sup> | 1.45x10 <sup>-05</sup> | 7.46    |
| <i>TAF9B</i>      | 1.12                | 6.28   | 7.66    | 1.79x10 <sup>-10</sup> | 6.34x10 <sup>-08</sup> | 13.56   |
| <i>VGLL4</i>      | 1.12                | 9.23   | 6.19    | 5.61x10 <sup>-08</sup> | 9.82x10 <sup>-06</sup> | 7.91    |
| <i>ARHGAP28</i>   | 1.12                | 5.04   | 4.57    | 2.41x10 <sup>-05</sup> | 1.75x10 <sup>-03</sup> | 2.00    |
| <i>CELF2</i>      | 1.12                | 5.48   | 5.08    | 3.92x10 <sup>-06</sup> | 3.73x10 <sup>-04</sup> | 3.76    |
| <i>FCGR3B</i>     | 1.11                | 5.58   | 4.15    | 1.05x10 <sup>-04</sup> | 6.19x10 <sup>-03</sup> | 0.58    |
| <i>TRIM52</i>     | 1.11                | 5.83   | 6.55    | 1.40x10 <sup>-08</sup> | 2.86x10 <sup>-06</sup> | 9.27    |
| <i>KIAA1147</i>   | 1.11                | 6.70   | 7.51    | 3.13x10 <sup>-10</sup> | 1.02x10 <sup>-07</sup> | 13.01   |
| <i>RASGRP3</i>    | 1.11                | 5.05   | 12.54   | 1.70x10 <sup>-18</sup> | 6.01x10 <sup>-15</sup> | 31.80   |
| <i>IGSF6</i>      | 1.11                | 4.51   | 5.56    | 6.38x10 <sup>-07</sup> | 7.94x10 <sup>-05</sup> | 5.52    |
| <i>ZNF593</i>     | 1.11                | 7.85   | 4.53    | 2.81x10 <sup>-05</sup> | 2.00x10 <sup>-03</sup> | 1.85    |
| <i>RNFT1</i>      | 1.11                | 5.76   | 6.66    | 9.06x10 <sup>-09</sup> | 2.00x10 <sup>-06</sup> | 9.70    |
| <i>CREBRF</i>     | 1.11                | 6.29   | 5.69    | 3.89x10 <sup>-07</sup> | 5.21x10 <sup>-05</sup> | 6.01    |
| <i>LAPTM4B</i>    | 1.11                | 10.11  | 4.01    | 1.71x10 <sup>-04</sup> | 9.41x10 <sup>-03</sup> | 0.11    |

Table SII. Continued.

| Gene symbol      | log <sub>2</sub> FC | AveExp | t-score | P-value                | P <sup>adj</sup>       | B-value |
|------------------|---------------------|--------|---------|------------------------|------------------------|---------|
| <i>CCDC84</i>    | 1.11                | 7.17   | 5.70    | 3.84x10 <sup>-07</sup> | 5.17x10 <sup>-05</sup> | 6.02    |
| <i>PLEKHO1</i>   | 1.11                | 8.30   | 4.30    | 6.41x10 <sup>-05</sup> | 4.06x10 <sup>-03</sup> | 1.06    |
| <i>GPRC5C</i>    | 1.11                | 5.91   | 5.59    | 5.67x10 <sup>-07</sup> | 7.20x10 <sup>-05</sup> | 5.64    |
| <i>WDR75</i>     | 1.11                | 7.55   | 5.63    | 4.97x10 <sup>-07</sup> | 6.46x10 <sup>-05</sup> | 5.77    |
| <i>ARID2</i>     | 1.11                | 6.59   | 7.84    | 8.60x10 <sup>-11</sup> | 3.39x10 <sup>-08</sup> | 14.28   |
| <i>APOPT1</i>    | 1.11                | 8.05   | 8.35    | 1.13x10 <sup>-11</sup> | 5.80x10 <sup>-09</sup> | 16.29   |
| <i>ICAM2</i>     | 1.11                | 6.52   | 5.82    | 2.40x10 <sup>-07</sup> | 3.44x10 <sup>-05</sup> | 6.48    |
| <i>MIGA1</i>     | 1.10                | 6.79   | 5.62    | 5.13x10 <sup>-07</sup> | 6.62x10 <sup>-05</sup> | 5.74    |
| <i>MFSD14A</i>   | 1.10                | 9.35   | 6.13    | 7.27x10 <sup>-08</sup> | 1.23x10 <sup>-05</sup> | 7.65    |
| <i>TRA2A</i>     | 1.10                | 6.51   | 6.69    | 8.03x10 <sup>-09</sup> | 1.79x10 <sup>-06</sup> | 9.81    |
| <i>C2orf68</i>   | 1.10                | 6.15   | 5.98    | 1.29x10 <sup>-07</sup> | 2.02x10 <sup>-05</sup> | 7.09    |
| <i>ADORA3</i>    | 1.10                | 5.21   | 7.29    | 7.59x10 <sup>-10</sup> | 2.27x10 <sup>-07</sup> | 12.14   |
| <i>CARD16</i>    | 1.10                | 5.22   | 5.29    | 1.76x10 <sup>-06</sup> | 1.89x10 <sup>-04</sup> | 4.54    |
| <i>JDP2</i>      | 1.10                | 6.32   | 5.91    | 1.69x10 <sup>-07</sup> | 2.54x10 <sup>-05</sup> | 6.83    |
| <i>INTS2</i>     | 1.10                | 6.21   | 5.17    | 2.76x10 <sup>-06</sup> | 2.75x10 <sup>-04</sup> | 4.10    |
| <i>LUC7L3</i>    | 1.10                | 7.93   | 6.65    | 9.52x10 <sup>-09</sup> | 2.09x10 <sup>-06</sup> | 9.65    |
| <i>CEP57</i>     | 1.10                | 7.31   | 4.84    | 9.44x10 <sup>-06</sup> | 7.88x10 <sup>-04</sup> | 2.90    |
| <i>P2RX7</i>     | 1.09                | 5.35   | 5.18    | 2.64x10 <sup>-06</sup> | 2.66x10 <sup>-04</sup> | 4.14    |
| <i>RUNDC3B</i>   | 1.09                | 4.58   | 4.53    | 2.86x10 <sup>-05</sup> | 2.03x10 <sup>-03</sup> | 1.83    |
| <i>RUNX3</i>     | 1.09                | 6.00   | 5.69    | 3.88x10 <sup>-07</sup> | 5.21x10 <sup>-05</sup> | 6.01    |
| <i>ROBO4</i>     | 1.09                | 6.27   | 10.10   | 1.31x10 <sup>-14</sup> | 1.52x10 <sup>-11</sup> | 22.97   |
| <i>SLC5A3</i>    | 1.09                | 7.71   | 4.34    | 5.54x10 <sup>-05</sup> | 3.59x10 <sup>-03</sup> | 1.19    |
| <i>XRCC2</i>     | 1.09                | 7.02   | 5.42    | 1.09x10 <sup>-06</sup> | 1.25x10 <sup>-04</sup> | 5.00    |
| <i>GNA15</i>     | 1.09                | 5.49   | 4.02    | 1.65x10 <sup>-04</sup> | 9.12x10 <sup>-03</sup> | 0.15    |
| <i>TMEM267</i>   | 1.09                | 6.23   | 5.02    | 4.91x10 <sup>-06</sup> | 4.51x10 <sup>-04</sup> | 3.54    |
| <i>ARRDC3</i>    | 1.09                | 8.73   | 4.13    | 1.12x10 <sup>-04</sup> | 6.55x10 <sup>-03</sup> | 0.52    |
| <i>LAT2</i>      | 1.09                | 6.00   | 7.83    | 9.03x10 <sup>-11</sup> | 3.54x10 <sup>-08</sup> | 14.24   |
| <i>KLHL24</i>    | 1.09                | 6.12   | 7.66    | 1.75x10 <sup>-10</sup> | 6.23x10 <sup>-08</sup> | 13.58   |
| <i>CCNB1IP1</i>  | 1.09                | 9.18   | 4.66    | 1.77x10 <sup>-05</sup> | 1.34x10 <sup>-03</sup> | 2.30    |
| <i>RPL35</i>     | 1.09                | 12.61  | 7.68    | 1.61x10 <sup>-10</sup> | 5.80x10 <sup>-08</sup> | 13.67   |
| <i>CYBB</i>      | 1.09                | 5.00   | 8.08    | 3.32x10 <sup>-11</sup> | 1.48x10 <sup>-08</sup> | 15.22   |
| <i>SLC39A11</i>  | 1.09                | 7.07   | 5.87    | 1.94x10 <sup>-07</sup> | 2.86x10 <sup>-05</sup> | 6.69    |
| <i>ST3GAL6</i>   | 1.09                | 5.03   | 5.48    | 8.71x10 <sup>-07</sup> | 1.04x10 <sup>-04</sup> | 5.22    |
| <i>ZNF83</i>     | 1.09                | 6.55   | 5.04    | 4.50x10 <sup>-06</sup> | 4.19x10 <sup>-04</sup> | 3.62    |
| <i>PSMA3-AS1</i> | 1.08                | 5.70   | 5.43    | 1.05x10 <sup>-06</sup> | 1.22x10 <sup>-04</sup> | 5.03    |
| <i>SSI8L1</i>    | 1.08                | 7.20   | 4.79    | 1.13x10 <sup>-05</sup> | 9.12x10 <sup>-04</sup> | 2.73    |
| <i>KAT2B</i>     | 1.08                | 7.09   | 4.36    | 5.15x10 <sup>-05</sup> | 3.38x10 <sup>-03</sup> | 1.27    |
| <i>ANKRD12</i>   | 1.08                | 6.55   | 5.69    | 3.89x10 <sup>-07</sup> | 5.22x10 <sup>-05</sup> | 6.01    |
| <i>BCL2L11</i>   | 1.08                | 6.16   | 8.50    | 6.34x10 <sup>-12</sup> | 3.53x10 <sup>-09</sup> | 16.86   |
| <i>IQCH-AS1</i>  | 1.08                | 5.81   | 6.91    | 3.44x10 <sup>-09</sup> | 8.47x10 <sup>-07</sup> | 10.65   |
| <i>FMC1</i>      | 1.08                | 7.89   | 4.52    | 2.94x10 <sup>-05</sup> | 2.08x10 <sup>-03</sup> | 1.80    |
| <i>SGK494</i>    | 1.08                | 4.84   | 6.43    | 2.27x10 <sup>-08</sup> | 4.41x10 <sup>-06</sup> | 8.79    |
| <i>PIK3CG</i>    | 1.08                | 4.42   | 8.27    | 1.56x10 <sup>-11</sup> | 7.64x10 <sup>-09</sup> | 15.97   |
| <i>SUMO4</i>     | 1.08                | 8.82   | 10.21   | 8.48x10 <sup>-15</sup> | 1.03x10 <sup>-11</sup> | 23.40   |
| <i>SRSF4</i>     | 1.08                | 6.10   | 6.80    | 5.26x10 <sup>-09</sup> | 1.23x10 <sup>-06</sup> | 10.23   |
| <i>CIQTNF1</i>   | 1.08                | 6.30   | 4.32    | 5.86x10 <sup>-05</sup> | 3.77x10 <sup>-03</sup> | 1.14    |
| <i>FOLR1</i>     | 1.08                | 7.54   | 4.28    | 6.81x10 <sup>-05</sup> | 4.28x10 <sup>-03</sup> | 1.00    |
| <i>NUPL2</i>     | 1.08                | 6.93   | 6.13    | 7.28x10 <sup>-08</sup> | 1.23x10 <sup>-05</sup> | 7.65    |
| <i>ARL15</i>     | 1.07                | 6.55   | 4.84    | 9.18x10 <sup>-06</sup> | 7.71x10 <sup>-04</sup> | 2.93    |



Table SII. Continued.

| Gene symbol       | log <sub>2</sub> FC | AveExp | t-score | P-value                | P <sup>adj</sup>       | B-value |
|-------------------|---------------------|--------|---------|------------------------|------------------------|---------|
| <i>NCK1-DT</i>    | 1.07                | 5.67   | 6.24    | 4.76x10 <sup>-08</sup> | 8.50x10 <sup>-06</sup> | 8.07    |
| <i>GSTA4</i>      | 1.07                | 7.98   | 4.42    | 4.19x10 <sup>-05</sup> | 2.82x10 <sup>-03</sup> | 1.46    |
| <i>METTL3</i>     | 1.07                | 6.94   | 7.94    | 5.89x10 <sup>-11</sup> | 2.45x10 <sup>-08</sup> | 14.66   |
| <i>SLC39A8</i>    | 1.07                | 5.25   | 9.38    | 2.06x10 <sup>-13</sup> | 1.76x10 <sup>-10</sup> | 20.24   |
| <i>HOXB-AS1</i>   | 1.07                | 5.48   | 5.75    | 3.09x10 <sup>-07</sup> | 4.26x10 <sup>-05</sup> | 6.23    |
| <i>VASH2</i>      | 1.07                | 4.89   | 4.80    | 1.08x10 <sup>-05</sup> | 8.79x10 <sup>-04</sup> | 2.78    |
| <i>ZEB2</i>       | 1.07                | 6.01   | 8.18    | 2.21x10 <sup>-11</sup> | 1.05x10 <sup>-08</sup> | 15.63   |
| <i>ARHGAP9</i>    | 1.07                | 5.63   | 4.71    | 1.50x10 <sup>-05</sup> | 1.17x10 <sup>-03</sup> | 2.45    |
| <i>SULT1A1</i>    | 1.07                | 6.99   | 6.06    | 9.38x10 <sup>-08</sup> | 1.54x10 <sup>-05</sup> | 7.40    |
| <i>ZNF146</i>     | 1.07                | 8.27   | 4.38    | 4.70x10 <sup>-05</sup> | 3.12x10 <sup>-03</sup> | 1.35    |
| <i>FAM13A-AS1</i> | 1.07                | 5.54   | 8.09    | 3.19x10 <sup>-11</sup> | 1.44x10 <sup>-08</sup> | 15.26   |
| <i>DOCK4</i>      | 1.06                | 5.33   | 11.21   | 2.09x10 <sup>-16</sup> | 4.06x10 <sup>-13</sup> | 27.05   |
| <i>KIF21A</i>     | 1.06                | 5.08   | 4.27    | 7.02x10 <sup>-05</sup> | 4.39x10 <sup>-03</sup> | 0.97    |
| <i>AKAP9</i>      | 1.06                | 5.89   | 7.64    | 1.94x10 <sup>-10</sup> | 6.75x10 <sup>-08</sup> | 13.48   |
| <i>UXT</i>        | 1.06                | 10.16  | 5.37    | 1.30x10 <sup>-06</sup> | 1.44x10 <sup>-04</sup> | 4.83    |
| <i>NFKBIA</i>     | 1.06                | 7.53   | 8.65    | 3.60x10 <sup>-12</sup> | 2.19x10 <sup>-09</sup> | 17.42   |
| <i>MBTD1</i>      | 1.06                | 5.17   | 11.09   | 3.18x10 <sup>-16</sup> | 5.86x10 <sup>-13</sup> | 26.64   |
| <i>FMNL3</i>      | 1.06                | 5.94   | 5.43    | 1.04x10 <sup>-06</sup> | 1.21x10 <sup>-04</sup> | 5.05    |
| <i>TSPAN33</i>    | 1.06                | 7.21   | 5.21    | 2.42x10 <sup>-06</sup> | 2.47x10 <sup>-04</sup> | 4.23    |
| <i>ALMS1</i>      | 1.06                | 7.02   | 6.82    | 4.92x10 <sup>-09</sup> | 1.16x10 <sup>-06</sup> | 10.30   |
| <i>THOC1</i>      | 1.06                | 8.52   | 5.32    | 1.60x10 <sup>-06</sup> | 1.73x10 <sup>-04</sup> | 4.63    |
| <i>LMO2</i>       | 1.06                | 5.65   | 6.93    | 3.20x10 <sup>-09</sup> | 7.96x10 <sup>-07</sup> | 10.72   |
| <i>RRN3P2</i>     | 1.06                | 5.59   | 6.10    | 7.97x10 <sup>-08</sup> | 1.33x10 <sup>-05</sup> | 7.56    |
| <i>RGS10</i>      | 1.05                | 6.65   | 5.62    | 5.13x10 <sup>-07</sup> | 6.63x10 <sup>-05</sup> | 5.74    |
| <i>CENPC</i>      | 1.05                | 6.23   | 5.42    | 1.08x10 <sup>-06</sup> | 1.25x10 <sup>-04</sup> | 5.01    |
| <i>CDCA7</i>      | 1.05                | 5.92   | 4.44    | 3.85x10 <sup>-05</sup> | 2.62x10 <sup>-03</sup> | 1.54    |
| <i>RPL31</i>      | 1.05                | 9.77   | 5.23    | 2.23x10 <sup>-06</sup> | 2.30x10 <sup>-04</sup> | 4.31    |
| <i>MAP2</i>       | 1.05                | 5.06   | 4.55    | 2.62x10 <sup>-05</sup> | 1.88x10 <sup>-03</sup> | 1.92    |
| <i>TCF4</i>       | 1.05                | 8.95   | 5.73    | 3.33x10 <sup>-07</sup> | 4.54x10 <sup>-05</sup> | 6.16    |
| <i>PPP4R3A</i>    | 1.05                | 6.76   | 7.20    | 1.09x10 <sup>-09</sup> | 3.13x10 <sup>-07</sup> | 11.78   |
| <i>GEMIN2</i>     | 1.05                | 6.64   | 4.52    | 2.97x10 <sup>-05</sup> | 2.10x10 <sup>-03</sup> | 1.79    |
| <i>GORAB</i>      | 1.05                | 8.06   | 4.62    | 2.09x10 <sup>-05</sup> | 1.55x10 <sup>-03</sup> | 2.14    |
| <i>DCLRE1C</i>    | 1.05                | 6.00   | 5.81    | 2.45x10 <sup>-07</sup> | 3.49x10 <sup>-05</sup> | 6.46    |
| <i>RNF19B</i>     | 1.05                | 6.86   | 5.13    | 3.19x10 <sup>-06</sup> | 3.12x10 <sup>-04</sup> | 3.96    |
| <i>COX2</i>       | 1.05                | 13.61  | 7.03    | 2.09x10 <sup>-09</sup> | 5.54x10 <sup>-07</sup> | 11.14   |
| <i>C8orf76</i>    | 1.04                | 7.12   | 4.68    | 1.64x10 <sup>-05</sup> | 1.26x10 <sup>-03</sup> | 2.37    |
| <i>DNM3</i>       | 1.04                | 4.87   | 5.32    | 1.56x10 <sup>-06</sup> | 1.70x10 <sup>-04</sup> | 4.65    |
| <i>NOL11</i>      | 1.04                | 9.29   | 4.76    | 1.25x10 <sup>-05</sup> | 9.96x10 <sup>-04</sup> | 2.63    |
| <i>SNCAIP</i>     | 1.04                | 5.50   | 4.83    | 9.68x10 <sup>-06</sup> | 8.05x10 <sup>-04</sup> | 2.88    |
| <i>ZBTB34</i>     | 1.04                | 7.24   | 5.32    | 1.59x10 <sup>-06</sup> | 1.73x10 <sup>-04</sup> | 4.63    |
| <i>CD48</i>       | 1.04                | 5.70   | 4.41    | 4.27x10 <sup>-05</sup> | 2.87x10 <sup>-03</sup> | 1.45    |
| <i>FAM221A</i>    | 1.04                | 4.45   | 5.33    | 1.55x10 <sup>-06</sup> | 1.69x10 <sup>-04</sup> | 4.66    |
| <i>NDC1</i>       | 1.04                | 7.58   | 4.30    | 6.24x10 <sup>-05</sup> | 3.97x10 <sup>-03</sup> | 1.08    |
| <i>CMC4</i>       | 1.04                | 8.09   | 4.78    | 1.16x10 <sup>-05</sup> | 9.32x10 <sup>-04</sup> | 2.71    |
| <i>NASP</i>       | 1.04                | 6.69   | 5.52    | 7.38x10 <sup>-07</sup> | 9.01x10 <sup>-05</sup> | 5.38    |
| <i>ZNF704</i>     | 1.04                | 5.11   | 8.32    | 1.28x10 <sup>-11</sup> | 6.46x10 <sup>-09</sup> | 16.17   |
| <i>CLNS1A</i>     | 1.04                | 8.43   | 4.79    | 1.11x10 <sup>-05</sup> | 9.00x10 <sup>-04</sup> | 2.75    |
| <i>PTPN22</i>     | 1.03                | 4.56   | 4.79    | 1.13x10 <sup>-05</sup> | 9.12x10 <sup>-04</sup> | 2.73    |
| <i>ITGA6</i>      | 1.03                | 6.28   | 7.35    | 5.90x10 <sup>-10</sup> | 1.80x10 <sup>-07</sup> | 12.39   |

Table SII. Continued.

| Gene symbol         | log <sub>2</sub> FC | AveExp | t-score | P-value                | P <sup>adj</sup>       | B-value |
|---------------------|---------------------|--------|---------|------------------------|------------------------|---------|
| <i>KLF10</i>        | 1.03                | 9.93   | 4.81    | 1.05x10 <sup>-05</sup> | 8.65x10 <sup>-04</sup> | 2.80    |
| <i>IMP3</i>         | 1.03                | 7.74   | 6.59    | 1.18x10 <sup>-08</sup> | 2.49x10 <sup>-06</sup> | 9.44    |
| <i>PAXIP1-AS1</i>   | 1.03                | 4.97   | 3.99    | 1.82x10 <sup>-04</sup> | 9.88x10 <sup>-03</sup> | 0.06    |
| <i>MRPL34</i>       | 1.03                | 7.94   | 5.21    | 2.36x10 <sup>-06</sup> | 2.42x10 <sup>-04</sup> | 4.25    |
| <i>LOC114224</i>    | 1.03                | 5.82   | 4.67    | 1.70x10 <sup>-05</sup> | 1.30x10 <sup>-03</sup> | 2.33    |
| <i>ABHD18</i>       | 1.03                | 6.22   | 7.16    | 1.26x10 <sup>-09</sup> | 3.52x10 <sup>-07</sup> | 11.64   |
| <i>ZNF430</i>       | 1.03                | 6.06   | 5.58    | 5.90x10 <sup>-07</sup> | 7.44x10 <sup>-05</sup> | 5.60    |
| <i>PPFIA2</i>       | 1.03                | 5.17   | 4.90    | 7.45x10 <sup>-06</sup> | 6.42x10 <sup>-04</sup> | 3.13    |
| <i>NCAM1</i>        | 1.03                | 5.50   | 5.23    | 2.19x10 <sup>-06</sup> | 2.27x10 <sup>-04</sup> | 4.32    |
| <i>AUP1</i>         | 1.03                | 8.77   | 5.56    | 6.50x10 <sup>-07</sup> | 8.06x10 <sup>-05</sup> | 5.51    |
| <i>ZHX2</i>         | 1.02                | 5.88   | 5.46    | 9.43x10 <sup>-07</sup> | 1.11x10 <sup>-04</sup> | 5.14    |
| <i>LOC100133315</i> | 1.02                | 6.09   | 5.30    | 1.71x10 <sup>-06</sup> | 1.84x10 <sup>-04</sup> | 4.56    |
| <i>PLD1</i>         | 1.02                | 5.12   | 7.84    | 8.60x10 <sup>-11</sup> | 3.39x10 <sup>-08</sup> | 14.29   |
| <i>ZNF431</i>       | 1.02                | 4.86   | 6.52    | 1.55x10 <sup>-08</sup> | 3.15x10 <sup>-06</sup> | 9.17    |
| <i>FBXW12</i>       | 1.02                | 6.65   | 7.20    | 1.09x10 <sup>-09</sup> | 3.13x10 <sup>-07</sup> | 11.78   |
| <i>ZNF518A</i>      | 1.02                | 6.10   | 7.89    | 6.96x10 <sup>-11</sup> | 2.83x10 <sup>-08</sup> | 14.49   |
| <i>GNA13</i>        | 1.02                | 7.76   | 7.51    | 3.14x10 <sup>-10</sup> | 1.03x10 <sup>-07</sup> | 13.01   |
| <i>MGME1</i>        | 1.02                | 8.57   | 4.59    | 2.32x10 <sup>-05</sup> | 1.69x10 <sup>-03</sup> | 2.04    |
| <i>NCOA1</i>        | 1.02                | 7.23   | 6.64    | 9.90x10 <sup>-09</sup> | 2.15x10 <sup>-06</sup> | 9.61    |
| <i>PDE2A</i>        | 1.02                | 6.17   | 6.24    | 4.78x10 <sup>-08</sup> | 8.52x10 <sup>-06</sup> | 8.06    |
| <i>FLVCR1</i>       | 1.01                | 6.25   | 4.16    | 1.02x10 <sup>-04</sup> | 6.04x10 <sup>-03</sup> | 0.61    |
| <i>CCAR1</i>        | 1.01                | 7.05   | 7.64    | 1.91x10 <sup>-10</sup> | 6.70x10 <sup>-08</sup> | 13.50   |
| <i>ZFHX4</i>        | 1.01                | 6.71   | 4.06    | 1.41x10 <sup>-04</sup> | 7.98x10 <sup>-03</sup> | 0.30    |
| <i>CREB5</i>        | 1.01                | 5.74   | 5.57    | 6.09x10 <sup>-07</sup> | 7.63x10 <sup>-05</sup> | 5.57    |
| <i>RAB42</i>        | 1.01                | 7.17   | 4.81    | 1.05x10 <sup>-05</sup> | 8.63x10 <sup>-04</sup> | 2.80    |
| <i>EFHC1</i>        | 1.01                | 6.36   | 6.38    | 2.77x10 <sup>-08</sup> | 5.29x10 <sup>-06</sup> | 8.60    |
| <i>COX6B1</i>       | 1.01                | 10.39  | 5.94    | 1.48x10 <sup>-07</sup> | 2.26x10 <sup>-05</sup> | 6.96    |
| <i>LINC00847</i>    | 1.01                | 6.29   | 6.54    | 1.47x10 <sup>-08</sup> | 2.99x10 <sup>-06</sup> | 9.22    |
| <i>ZRANB2</i>       | 1.01                | 9.57   | 7.06    | 1.88x10 <sup>-09</sup> | 5.04x10 <sup>-07</sup> | 11.24   |
| <i>HECA</i>         | 1.01                | 6.53   | 7.88    | 7.31x10 <sup>-11</sup> | 2.94x10 <sup>-08</sup> | 14.45   |
| <i>PRKRA</i>        | 1.01                | 7.28   | 5.81    | 2.49x10 <sup>-07</sup> | 3.55x10 <sup>-05</sup> | 6.44    |
| <i>RHOJ</i>         | 1.01                | 5.70   | 4.84    | 9.29x10 <sup>-06</sup> | 7.79x10 <sup>-04</sup> | 2.92    |
| <i>POLR2J</i>       | 1.01                | 9.55   | 4.92    | 7.08x10 <sup>-06</sup> | 6.14x10 <sup>-04</sup> | 3.18    |
| <i>RAMP2</i>        | 1.01                | 6.37   | 5.28    | 1.83x10 <sup>-06</sup> | 1.95x10 <sup>-04</sup> | 4.50    |
| <i>PCAT19</i>       | 1.01                | 5.19   | 6.19    | 5.80x10 <sup>-08</sup> | 1.01x10 <sup>-05</sup> | 7.87    |
| <i>ATP5PF</i>       | 1.00                | 11.21  | 7.54    | 2.79x10 <sup>-10</sup> | 9.24x10 <sup>-08</sup> | 13.12   |
| <i>NOSTRIN</i>      | 1.00                | 4.65   | 4.40    | 4.45x10 <sup>-05</sup> | 2.97x10 <sup>-03</sup> | 1.41    |
| <i>SH2B2</i>        | 1.00                | 7.65   | 7.86    | 7.92x10 <sup>-11</sup> | 3.17x10 <sup>-08</sup> | 14.37   |
| <i>COX7C</i>        | 1.00                | 10.77  | 5.24    | 2.10x10 <sup>-06</sup> | 2.19x10 <sup>-04</sup> | 4.36    |
| <i>C21orf91</i>     | 1.00                | 7.22   | 4.65    | 1.88x10 <sup>-05</sup> | 1.42x10 <sup>-03</sup> | 2.24    |
| <i>ZC3H8</i>        | 1.00                | 5.98   | 5.80    | 2.57x10 <sup>-07</sup> | 3.64x10 <sup>-05</sup> | 6.41    |
| <i>PMP22</i>        | 1.00                | 6.55   | 5.24    | 2.15x10 <sup>-06</sup> | 2.24x10 <sup>-04</sup> | 4.34    |
| <i>UBL7-AS1</i>     | 1.00                | 5.51   | 5.20    | 2.47x10 <sup>-06</sup> | 2.51x10 <sup>-04</sup> | 4.20    |
| <i>ZNF426</i>       | 1.00                | 6.51   | 4.06    | 1.41x10 <sup>-04</sup> | 7.99x10 <sup>-03</sup> | 0.30    |
| <i>NDUFB11</i>      | 1.00                | 10.48  | 6.06    | 9.46x10 <sup>-08</sup> | 1.55x10 <sup>-05</sup> | 7.39    |
| <i>WASF1</i>        | -1.00               | 7.08   | -4.88   | 8.00x10 <sup>-06</sup> | 6.84x10 <sup>-04</sup> | 3.06    |
| <i>MICA</i>         | -1.00               | 7.10   | -5.23   | 2.25x10 <sup>-06</sup> | 2.31x10 <sup>-04</sup> | 4.30    |
| <i>BCL9L</i>        | -1.01               | 6.51   | -6.02   | 1.12x10 <sup>-07</sup> | 1.79x10 <sup>-05</sup> | 7.23    |
| <i>PDHB</i>         | -1.01               | 8.99   | -6.84   | 4.49x10 <sup>-09</sup> | 1.07x10 <sup>-06</sup> | 10.39   |

Table SII. Continued.

| Gene symbol      | log <sub>2</sub> FC | AveExp | t-score | P-value                | P <sup>adj</sup>       | B-value |
|------------------|---------------------|--------|---------|------------------------|------------------------|---------|
| <i>MGAM</i>      | -1.01               | 3.73   | -8.94   | 1.13x10 <sup>-12</sup> | 7.94x10 <sup>-10</sup> | 18.56   |
| <i>PEAK1</i>     | -1.01               | 7.91   | -8.88   | 1.44x10 <sup>-12</sup> | 9.69x10 <sup>-10</sup> | 18.33   |
| <i>FERMT2</i>    | -1.01               | 9.15   | -4.00   | 1.77x10 <sup>-04</sup> | 9.70x10 <sup>-03</sup> | 0.08    |
| <i>DIAPH3</i>    | -1.01               | 5.28   | -6.70   | 7.73x10 <sup>-09</sup> | 1.73x10 <sup>-06</sup> | 9.85    |
| <i>TMEM171</i>   | -1.01               | 3.99   | -7.95   | 5.56x10 <sup>-11</sup> | 2.35x10 <sup>-08</sup> | 14.71   |
| <i>TMEM246</i>   | -1.01               | 5.35   | -7.91   | 6.57x10 <sup>-11</sup> | 2.68x10 <sup>-08</sup> | 14.55   |
| <i>RAI14</i>     | -1.02               | 9.52   | -4.26   | 7.22x10 <sup>-05</sup> | 4.49x10 <sup>-03</sup> | 0.94    |
| <i>NHS</i>       | -1.02               | 4.86   | -5.23   | 2.23x10 <sup>-06</sup> | 2.30x10 <sup>-04</sup> | 4.31    |
| <i>RAB36</i>     | -1.02               | 5.56   | -6.49   | 1.75x10 <sup>-08</sup> | 3.49x10 <sup>-06</sup> | 9.05    |
| <i>ABAT</i>      | -1.02               | 4.93   | -7.07   | 1.78x10 <sup>-09</sup> | 4.79x10 <sup>-07</sup> | 11.30   |
| <i>CDIP1</i>     | -1.02               | 6.12   | -8.58   | 4.68x10 <sup>-12</sup> | 2.75x10 <sup>-09</sup> | 17.16   |
| <i>DBN1</i>      | -1.02               | 7.59   | -5.19   | 2.60x10 <sup>-06</sup> | 2.62x10 <sup>-04</sup> | 4.16    |
| <i>TSPAN4</i>    | -1.02               | 7.92   | -4.38   | 4.84x10 <sup>-05</sup> | 3.21x10 <sup>-03</sup> | 1.32    |
| <i>CDR2L</i>     | -1.02               | 6.87   | -7.40   | 4.89x10 <sup>-10</sup> | 1.52x10 <sup>-07</sup> | 12.57   |
| <i>ENG</i>       | -1.02               | 6.45   | -7.50   | 3.33x10 <sup>-10</sup> | 1.08x10 <sup>-07</sup> | 12.95   |
| <i>KIF3C</i>     | -1.02               | 6.62   | -7.21   | 1.03x10 <sup>-09</sup> | 2.98x10 <sup>-07</sup> | 11.84   |
| <i>NFIC</i>      | -1.03               | 7.37   | -4.90   | 7.51x10 <sup>-06</sup> | 6.46x10 <sup>-04</sup> | 3.13    |
| <i>RMND5B</i>    | -1.03               | 5.76   | -7.19   | 1.10x10 <sup>-09</sup> | 3.16x10 <sup>-07</sup> | 11.77   |
| <i>RAB11FIP5</i> | -1.03               | 7.13   | -6.32   | 3.49x10 <sup>-08</sup> | 6.45x10 <sup>-06</sup> | 8.37    |
| <i>RPS27L</i>    | -1.03               | 8.06   | -6.13   | 7.26x10 <sup>-08</sup> | 1.23x10 <sup>-05</sup> | 7.65    |
| <i>TRIM6</i>     | -1.03               | 5.86   | -4.35   | 5.24x10 <sup>-05</sup> | 3.43x10 <sup>-03</sup> | 1.25    |
| <i>TCTA</i>      | -1.03               | 7.66   | -5.67   | 4.29x10 <sup>-07</sup> | 5.69x10 <sup>-05</sup> | 5.91    |
| <i>TPM2</i>      | -1.03               | 6.75   | -4.89   | 7.69x10 <sup>-06</sup> | 6.60x10 <sup>-04</sup> | 3.10    |
| <i>PARP3</i>     | -1.04               | 5.87   | -6.91   | 3.41x10 <sup>-09</sup> | 8.42x10 <sup>-07</sup> | 10.66   |
| <i>CIGALT1</i>   | -1.04               | 7.33   | -5.16   | 2.85x10 <sup>-06</sup> | 2.84x10 <sup>-04</sup> | 4.06    |
| <i>TST</i>       | -1.04               | 7.40   | -5.40   | 1.20x10 <sup>-06</sup> | 1.35x10 <sup>-04</sup> | 4.91    |
| <i>ACOX3</i>     | -1.04               | 6.37   | -6.27   | 4.17x10 <sup>-08</sup> | 7.51x10 <sup>-06</sup> | 8.20    |
| <i>MFSD10</i>    | -1.04               | 6.92   | -5.07   | 3.96x10 <sup>-06</sup> | 3.76x10 <sup>-04</sup> | 3.75    |
| <i>PARVA</i>     | -1.04               | 6.90   | -6.58   | 1.23x10 <sup>-08</sup> | 2.58x10 <sup>-06</sup> | 9.40    |
| <i>ADRA2C</i>    | -1.04               | 5.39   | -6.49   | 1.75x10 <sup>-08</sup> | 3.49x10 <sup>-06</sup> | 9.05    |
| <i>CLCF1</i>     | -1.04               | 6.18   | -9.65   | 7.41x10 <sup>-14</sup> | 7.13x10 <sup>-11</sup> | 21.26   |
| <i>VCL</i>       | -1.05               | 7.06   | -9.05   | 7.42x10 <sup>-13</sup> | 5.46x10 <sup>-10</sup> | 18.98   |
| <i>KCNMA1</i>    | -1.05               | 5.25   | -7.84   | 8.71x10 <sup>-11</sup> | 3.42x10 <sup>-08</sup> | 14.27   |
| <i>GALNT5</i>    | -1.05               | 5.54   | -5.60   | 5.53x10 <sup>-07</sup> | 7.06x10 <sup>-05</sup> | 5.66    |
| <i>GLS</i>       | -1.05               | 6.15   | -9.92   | 2.57x10 <sup>-14</sup> | 2.82x10 <sup>-11</sup> | 22.30   |
| <i>AIFM2</i>     | -1.05               | 6.06   | -6.38   | 2.69x10 <sup>-08</sup> | 5.14x10 <sup>-06</sup> | 8.63    |
| <i>RHBDF1</i>    | -1.05               | 6.02   | -7.51   | 3.20x10 <sup>-10</sup> | 1.04x10 <sup>-07</sup> | 12.99   |
| <i>DOLK</i>      | -1.05               | 6.91   | -5.55   | 6.55x10 <sup>-07</sup> | 8.12x10 <sup>-05</sup> | 5.50    |
| <i>CRISPLD2</i>  | -1.06               | 6.83   | -4.41   | 4.30x10 <sup>-05</sup> | 2.89x10 <sup>-03</sup> | 1.44    |
| <i>MYH9</i>      | -1.06               | 8.88   | -4.31   | 6.17x10 <sup>-05</sup> | 3.93x10 <sup>-03</sup> | 1.09    |
| <i>ELOVL6</i>    | -1.06               | 5.66   | -4.04   | 1.53x10 <sup>-04</sup> | 8.59x10 <sup>-03</sup> | 0.22    |
| <i>NAT14</i>     | -1.06               | 6.49   | -5.77   | 2.85x10 <sup>-07</sup> | 4.00x10 <sup>-05</sup> | 6.31    |
| <i>GLIS2</i>     | -1.06               | 8.13   | -4.11   | 1.20x10 <sup>-04</sup> | 6.97x10 <sup>-03</sup> | 0.45    |
| <i>TRNP1</i>     | -1.06               | 5.17   | -8.49   | 6.57x10 <sup>-12</sup> | 3.62x10 <sup>-09</sup> | 16.82   |
| <i>CD151</i>     | -1.06               | 8.05   | -5.04   | 4.50x10 <sup>-06</sup> | 4.18x10 <sup>-04</sup> | 3.62    |
| <i>TUBB3</i>     | -1.06               | 10.21  | -5.74   | 3.19x10 <sup>-07</sup> | 4.39x10 <sup>-05</sup> | 6.20    |
| <i>FGF7</i>      | -1.07               | 3.92   | -5.39   | 1.24x10 <sup>-06</sup> | 1.39x10 <sup>-04</sup> | 4.88    |
| <i>FAM234A</i>   | -1.07               | 7.69   | -6.08   | 8.87x10 <sup>-08</sup> | 1.46x10 <sup>-05</sup> | 7.46    |
| <i>CAV2</i>      | -1.07               | 7.20   | -4.13   | 1.13x10 <sup>-04</sup> | 6.63x10 <sup>-03</sup> | 0.51    |

Table SII. Continued.

| Gene symbol     | log <sub>2</sub> FC | AveExp | t-score | P-value                | P <sup>adj</sup>       | B-value |
|-----------------|---------------------|--------|---------|------------------------|------------------------|---------|
| <i>TNFAIP1</i>  | -1.07               | 7.20   | -7.71   | 1.41x10 <sup>-10</sup> | 5.25x10 <sup>-08</sup> | 13.79   |
| <i>RUSC2</i>    | -1.07               | 7.27   | -11.51  | 6.91x10 <sup>-17</sup> | 1.61x10 <sup>-13</sup> | 28.15   |
| <i>BACE1</i>    | -1.07               | 7.74   | -5.13   | 3.20x10 <sup>-06</sup> | 3.13x10 <sup>-04</sup> | 3.95    |
| <i>SH3BP4</i>   | -1.07               | 6.36   | -6.29   | 3.88x10 <sup>-08</sup> | 7.09x10 <sup>-06</sup> | 8.27    |
| <i>LIMK2</i>    | -1.07               | 5.74   | -8.43   | 8.46x10 <sup>-12</sup> | 4.50x10 <sup>-09</sup> | 16.57   |
| <i>MAGEE1</i>   | -1.07               | 5.31   | -6.86   | 4.20x10 <sup>-09</sup> | 1.01x10 <sup>-06</sup> | 10.45   |
| <i>ADD3</i>     | -1.07               | 9.50   | -4.92   | 6.91x10 <sup>-06</sup> | 6.03x10 <sup>-04</sup> | 3.21    |
| <i>TES</i>      | -1.08               | 6.88   | -6.01   | 1.15x10 <sup>-07</sup> | 1.83x10 <sup>-05</sup> | 7.20    |
| <i>GOPC</i>     | -1.08               | 6.82   | -8.01   | 4.33x10 <sup>-11</sup> | 1.88x10 <sup>-08</sup> | 14.96   |
| <i>MLF2</i>     | -1.08               | 8.83   | -4.30   | 6.36x10 <sup>-05</sup> | 4.03x10 <sup>-03</sup> | 1.06    |
| <i>FAM129B</i>  | -1.08               | 7.19   | -10.03  | 1.69x10 <sup>-14</sup> | 1.92x10 <sup>-11</sup> | 22.72   |
| <i>TMCO3</i>    | -1.08               | 6.04   | -5.13   | 3.17x10 <sup>-06</sup> | 3.11x10 <sup>-04</sup> | 3.96    |
| <i>PGRMC2</i>   | -1.08               | 8.27   | -5.30   | 1.72x10 <sup>-06</sup> | 1.85x10 <sup>-04</sup> | 4.56    |
| <i>TGFB2</i>    | -1.08               | 5.03   | -4.61   | 2.15x10 <sup>-05</sup> | 1.59x10 <sup>-03</sup> | 2.11    |
| <i>P3H3</i>     | -1.08               | 6.49   | -5.47   | 8.99x10 <sup>-07</sup> | 1.07x10 <sup>-04</sup> | 5.19    |
| <i>HRCT1</i>    | -1.09               | 6.50   | -5.95   | 1.43x10 <sup>-07</sup> | 2.20x10 <sup>-05</sup> | 6.99    |
| <i>NABP1</i>    | -1.09               | 6.23   | -5.24   | 2.17x10 <sup>-06</sup> | 2.25x10 <sup>-04</sup> | 4.33    |
| <i>DOCK5</i>    | -1.09               | 5.14   | -8.86   | 1.57x10 <sup>-12</sup> | 1.05x10 <sup>-09</sup> | 18.24   |
| <i>NDST1</i>    | -1.09               | 5.83   | -9.89   | 2.90x10 <sup>-14</sup> | 3.12x10 <sup>-11</sup> | 22.18   |
| <i>HOXA3</i>    | -1.10               | 5.16   | -8.04   | 3.98x10 <sup>-11</sup> | 1.75x10 <sup>-08</sup> | 15.04   |
| <i>DNAJC6</i>   | -1.10               | 4.05   | -6.96   | 2.82x10 <sup>-09</sup> | 7.20x10 <sup>-07</sup> | 10.84   |
| <i>NEK7</i>     | -1.10               | 10.27  | -4.68   | 1.67x10 <sup>-05</sup> | 1.29x10 <sup>-03</sup> | 2.35    |
| <i>BPGM</i>     | -1.10               | 7.55   | -4.19   | 9.09x10 <sup>-05</sup> | 5.48x10 <sup>-03</sup> | 0.72    |
| <i>CPT1C</i>    | -1.11               | 5.26   | -4.90   | 7.62x10 <sup>-06</sup> | 6.54x10 <sup>-04</sup> | 3.11    |
| <i>KATNAL1</i>  | -1.11               | 6.22   | -6.66   | 9.09x10 <sup>-09</sup> | 2.00x10 <sup>-06</sup> | 9.69    |
| <i>TP53</i>     | -1.11               | 5.56   | -4.34   | 5.41x10 <sup>-05</sup> | 3.51x10 <sup>-03</sup> | 1.22    |
| <i>SOCS5</i>    | -1.11               | 8.13   | -5.69   | 3.85x10 <sup>-07</sup> | 5.17x10 <sup>-05</sup> | 6.02    |
| <i>WTIP</i>     | -1.12               | 5.84   | -5.85   | 2.12x10 <sup>-07</sup> | 3.10x10 <sup>-05</sup> | 6.60    |
| <i>TSPAN5</i>   | -1.12               | 6.14   | -5.20   | 2.48x10 <sup>-06</sup> | 2.52x10 <sup>-04</sup> | 4.20    |
| <i>Il-Sep</i>   | -1.12               | 7.78   | -5.91   | 1.67x10 <sup>-07</sup> | 2.51x10 <sup>-05</sup> | 6.84    |
| <i>VASP</i>     | -1.12               | 7.87   | -6.08   | 8.64x10 <sup>-08</sup> | 1.44x10 <sup>-05</sup> | 7.48    |
| <i>CLIP3</i>    | -1.12               | 5.97   | -7.66   | 1.73x10 <sup>-10</sup> | 6.17x10 <sup>-08</sup> | 13.60   |
| <i>EBF3</i>     | -1.12               | 5.17   | -5.27   | 1.91x10 <sup>-06</sup> | 2.01x10 <sup>-04</sup> | 4.46    |
| <i>ATP13A3</i>  | -1.12               | 7.72   | -5.70   | 3.71x10 <sup>-07</sup> | 5.01x10 <sup>-05</sup> | 6.05    |
| <i>KIRREL3</i>  | -1.12               | 4.47   | -11.61  | 4.72x10 <sup>-17</sup> | 1.15x10 <sup>-13</sup> | 28.52   |
| <i>LACTB</i>    | -1.13               | 6.75   | -6.62   | 1.05x10 <sup>-08</sup> | 2.26x10 <sup>-06</sup> | 9.55    |
| <i>SPATA18</i>  | -1.13               | 5.02   | -6.85   | 4.29x10 <sup>-09</sup> | 1.03x10 <sup>-06</sup> | 10.43   |
| <i>RGS20</i>    | -1.13               | 4.62   | -15.16  | 2.75x10 <sup>-22</sup> | 2.33x10 <sup>-18</sup> | 40.37   |
| <i>TUBB6</i>    | -1.13               | 10.68  | -6.19   | 5.61x10 <sup>-08</sup> | 9.82x10 <sup>-06</sup> | 7.90    |
| <i>ACLY</i>     | -1.14               | 8.73   | -6.60   | 1.13x10 <sup>-08</sup> | 2.41x10 <sup>-06</sup> | 9.47    |
| <i>TLL1</i>     | -1.14               | 6.34   | -7.42   | 4.46x10 <sup>-10</sup> | 1.41x10 <sup>-07</sup> | 12.66   |
| <i>CD59</i>     | -1.14               | 9.15   | -5.39   | 1.20x10 <sup>-06</sup> | 1.36x10 <sup>-04</sup> | 4.91    |
| <i>ITGA11</i>   | -1.14               | 6.49   | -4.36   | 5.18x10 <sup>-05</sup> | 3.40x10 <sup>-03</sup> | 1.26    |
| <i>FDXR</i>     | -1.14               | 5.02   | -6.37   | 2.82x10 <sup>-08</sup> | 5.36x10 <sup>-06</sup> | 8.58    |
| <i>MFGES8</i>   | -1.14               | 7.70   | -4.30   | 6.21x10 <sup>-05</sup> | 3.95x10 <sup>-03</sup> | 1.08    |
| <i>VSIR</i>     | -1.14               | 5.88   | -6.22   | 5.00x10 <sup>-08</sup> | 8.86x10 <sup>-06</sup> | 8.02    |
| <i>TCEAL3</i>   | -1.14               | 9.03   | -5.55   | 6.60x10 <sup>-07</sup> | 8.17x10 <sup>-05</sup> | 5.49    |
| <i>CCDC102A</i> | -1.14               | 5.06   | -10.52  | 2.66x10 <sup>-15</sup> | 3.71x10 <sup>-12</sup> | 24.54   |
| <i>ANXA2P1</i>  | -1.15               | 4.88   | -8.60   | 4.26x10 <sup>-12</sup> | 2.52x10 <sup>-09</sup> | 17.25   |

Table SII. Continued.

| Gene symbol         | log <sub>2</sub> FC | AveExp | t-score | P-value                | P <sup>adj</sup>       | B-value |
|---------------------|---------------------|--------|---------|------------------------|------------------------|---------|
| <i>ABL1</i>         | -1.15               | 8.32   | -4.51   | 3.05x10 <sup>-05</sup> | 2.15x10 <sup>-03</sup> | 1.77    |
| <i>C16orf45</i>     | -1.15               | 6.23   | -8.36   | 1.12x10 <sup>-11</sup> | 5.75x10 <sup>-09</sup> | 16.30   |
| <i>MIPEP</i>        | -1.15               | 5.76   | -7.13   | 1.42x10 <sup>-09</sup> | 3.92x10 <sup>-07</sup> | 11.52   |
| <i>CCDC9B</i>       | -1.15               | 6.00   | -6.21   | 5.31x10 <sup>-08</sup> | 9.34x10 <sup>-06</sup> | 7.96    |
| <i>ZDHHC7</i>       | -1.15               | 8.85   | -6.88   | 3.82x10 <sup>-09</sup> | 9.31x10 <sup>-07</sup> | 10.55   |
| <i>PLAUR</i>        | -1.15               | 7.55   | -4.42   | 4.16x10 <sup>-05</sup> | 2.81x10 <sup>-03</sup> | 1.47    |
| <i>GALNT2</i>       | -1.15               | 6.84   | -6.36   | 2.91x10 <sup>-08</sup> | 5.50x10 <sup>-06</sup> | 8.55    |
| <i>FKRP</i>         | -1.15               | 5.34   | -8.39   | 9.92x10 <sup>-12</sup> | 5.18x10 <sup>-09</sup> | 16.42   |
| <i>ZNF703</i>       | -1.15               | 7.45   | -5.01   | 5.06x10 <sup>-06</sup> | 4.63x10 <sup>-04</sup> | 3.51    |
| <i>PRSS23</i>       | -1.16               | 7.66   | -4.60   | 2.19x10 <sup>-05</sup> | 1.62x10 <sup>-03</sup> | 2.09    |
| <i>ZDHHC16</i>      | -1.16               | 8.26   | -7.56   | 2.58x10 <sup>-10</sup> | 8.64x10 <sup>-08</sup> | 13.20   |
| <i>TFPI</i>         | -1.16               | 5.98   | -4.50   | 3.11x10 <sup>-05</sup> | 2.18x10 <sup>-03</sup> | 1.75    |
| <i>CTIF</i>         | -1.16               | 5.65   | -13.19  | 1.84x10 <sup>-19</sup> | 8.86x10 <sup>-16</sup> | 33.99   |
| <i>TP53I3</i>       | -1.16               | 8.12   | -4.42   | 4.17x10 <sup>-05</sup> | 2.81x10 <sup>-03</sup> | 1.47    |
| <i>CCDC92</i>       | -1.17               | 8.53   | -4.94   | 6.50x10 <sup>-06</sup> | 5.71x10 <sup>-04</sup> | 3.27    |
| <i>LOC101928076</i> | -1.17               | 4.28   | -5.19   | 2.56x10 <sup>-06</sup> | 2.59x10 <sup>-04</sup> | 4.17    |
| <i>MEGF6</i>        | -1.17               | 5.78   | -5.18   | 2.70x10 <sup>-06</sup> | 2.71x10 <sup>-04</sup> | 4.12    |
| <i>MRVII</i>        | -1.18               | 5.76   | -4.87   | 8.41x10 <sup>-06</sup> | 7.14x10 <sup>-04</sup> | 3.02    |
| <i>PSG5</i>         | -1.18               | 4.89   | -8.84   | 1.70x10 <sup>-12</sup> | 1.13x10 <sup>-09</sup> | 18.16   |
| <i>CDC42EP2</i>     | -1.18               | 6.04   | -10.62  | 1.82x10 <sup>-15</sup> | 2.71x10 <sup>-12</sup> | 24.92   |
| <i>ERLIN1</i>       | -1.18               | 7.55   | -6.54   | 1.46x10 <sup>-08</sup> | 2.97x10 <sup>-06</sup> | 9.23    |
| <i>GYS1</i>         | -1.18               | 7.65   | -4.27   | 7.09x10 <sup>-05</sup> | 4.43x10 <sup>-03</sup> | 0.96    |
| <i>FRMD5</i>        | -1.18               | 4.47   | -9.50   | 1.28x10 <sup>-13</sup> | 1.14x10 <sup>-10</sup> | 20.72   |
| <i>OSCP1</i>        | -1.18               | 4.98   | -8.44   | 8.16x10 <sup>-12</sup> | 4.38x10 <sup>-09</sup> | 16.61   |
| <i>PLIN3</i>        | -1.18               | 9.22   | -5.68   | 4.12x10 <sup>-07</sup> | 5.48x10 <sup>-05</sup> | 5.95    |
| <i>HOXA5</i>        | -1.18               | 7.53   | -5.14   | 3.06x10 <sup>-06</sup> | 3.01x10 <sup>-04</sup> | 4.00    |
| <i>LMO7</i>         | -1.18               | 5.54   | -8.45   | 7.93x10 <sup>-12</sup> | 4.28x10 <sup>-09</sup> | 16.64   |
| <i>MTCL1</i>        | -1.18               | 7.27   | -4.10   | 1.23x10 <sup>-04</sup> | 7.14x10 <sup>-03</sup> | 0.43    |
| <i>TMEM155</i>      | -1.19               | 3.95   | -7.70   | 1.52x10 <sup>-10</sup> | 5.58x10 <sup>-08</sup> | 13.72   |
| <i>FAS</i>          | -1.19               | 6.16   | -4.17   | 9.78x10 <sup>-05</sup> | 5.84x10 <sup>-03</sup> | 0.65    |
| <i>KCNQ5</i>        | -1.19               | 3.99   | -6.96   | 2.84x10 <sup>-09</sup> | 7.25x10 <sup>-07</sup> | 10.84   |
| <i>PNKP</i>         | -1.19               | 6.30   | -5.72   | 3.45x10 <sup>-07</sup> | 4.69x10 <sup>-05</sup> | 6.13    |
| <i>RTL8C</i>        | -1.20               | 9.98   | -5.30   | 1.68x10 <sup>-06</sup> | 1.82x10 <sup>-04</sup> | 4.58    |
| <i>PSG4</i>         | -1.20               | 4.82   | -6.74   | 6.74x10 <sup>-09</sup> | 1.54x10 <sup>-06</sup> | 9.99    |
| <i>PXDC1</i>        | -1.20               | 7.84   | -12.73  | 8.78x10 <sup>-19</sup> | 3.51x10 <sup>-15</sup> | 32.45   |
| <i>YIF1A</i>        | -1.20               | 9.56   | -5.89   | 1.82x10 <sup>-07</sup> | 2.71x10 <sup>-05</sup> | 6.75    |
| <i>AVPII</i>        | -1.20               | 7.88   | -6.23   | 4.97x10 <sup>-08</sup> | 8.82x10 <sup>-06</sup> | 8.02    |
| <i>LASP1</i>        | -1.20               | 10.43  | -8.12   | 2.80x10 <sup>-11</sup> | 1.28x10 <sup>-08</sup> | 15.39   |
| <i>NEFM</i>         | -1.20               | 4.09   | -7.98   | 4.94x10 <sup>-11</sup> | 2.12x10 <sup>-08</sup> | 14.83   |
| <i>DPCD</i>         | -1.21               | 7.19   | -6.66   | 8.95x10 <sup>-09</sup> | 1.97x10 <sup>-06</sup> | 9.71    |
| <i>KCTD10</i>       | -1.21               | 8.43   | -8.61   | 4.10x10 <sup>-12</sup> | 2.45x10 <sup>-09</sup> | 17.29   |
| <i>HHIP</i>         | -1.21               | 4.35   | -4.04   | 1.51x10 <sup>-04</sup> | 8.49x10 <sup>-03</sup> | 0.23    |
| <i>FAM50B</i>       | -1.22               | 6.12   | -6.29   | 3.91x10 <sup>-08</sup> | 7.13x10 <sup>-06</sup> | 8.26    |
| <i>SMAD7</i>        | -1.22               | 7.74   | -5.05   | 4.35x10 <sup>-06</sup> | 4.06x10 <sup>-04</sup> | 3.66    |
| <i>TPM4</i>         | -1.22               | 8.25   | -5.46   | 9.29x10 <sup>-07</sup> | 1.10x10 <sup>-04</sup> | 5.16    |
| <i>GPR176</i>       | -1.23               | 6.60   | -7.41   | 4.73x10 <sup>-10</sup> | 1.48x10 <sup>-07</sup> | 12.60   |
| <i>GALNT1</i>       | -1.23               | 9.00   | -7.56   | 2.65x10 <sup>-10</sup> | 8.85x10 <sup>-08</sup> | 13.18   |
| <i>LRRC32</i>       | -1.24               | 7.10   | -4.11   | 1.19x10 <sup>-04</sup> | 6.91x10 <sup>-03</sup> | 0.46    |
| <i>SLC7A11</i>      | -1.24               | 5.60   | -4.37   | 4.97x10 <sup>-05</sup> | 3.28x10 <sup>-03</sup> | 1.30    |

Table SII. Continued.

| Gene symbol         | log <sub>2</sub> FC | AveExp | t-score | P-value                | P <sup>adj</sup>       | B-value |
|---------------------|---------------------|--------|---------|------------------------|------------------------|---------|
| <i>COTL1</i>        | -1.24               | 7.05   | -7.75   | 1.24x10 <sup>-10</sup> | 4.65x10 <sup>-08</sup> | 13.92   |
| <i>GPAM</i>         | -1.24               | 6.41   | -4.53   | 2.80x10 <sup>-05</sup> | 2.00x10 <sup>-03</sup> | 1.85    |
| <i>GALNT10</i>      | -1.24               | 6.70   | -6.14   | 7.00x10 <sup>-08</sup> | 1.19x10 <sup>-05</sup> | 7.69    |
| <i>LIMA1</i>        | -1.24               | 7.23   | -5.93   | 1.57x10 <sup>-07</sup> | 2.39x10 <sup>-05</sup> | 6.90    |
| <i>SH2D4A</i>       | -1.24               | 5.50   | -9.18   | 4.50x10 <sup>-13</sup> | 3.54x10 <sup>-10</sup> | 19.47   |
| <i>MSRB3</i>        | -1.24               | 7.67   | -5.75   | 3.16x10 <sup>-07</sup> | 4.35x10 <sup>-05</sup> | 6.21    |
| <i>LIMS2</i>        | -1.24               | 6.16   | -7.33   | 6.47x10 <sup>-10</sup> | 1.97x10 <sup>-07</sup> | 12.29   |
| <i>NPAS1</i>        | -1.25               | 4.92   | -10.56  | 2.28x10 <sup>-15</sup> | 3.30x10 <sup>-12</sup> | 24.70   |
| <i>AFAP1</i>        | -1.26               | 4.94   | -7.20   | 1.09x10 <sup>-09</sup> | 3.13x10 <sup>-07</sup> | 11.78   |
| <i>PHLDA3</i>       | -1.26               | 6.42   | -8.18   | 2.25x10 <sup>-11</sup> | 1.07x10 <sup>-08</sup> | 15.61   |
| <i>MYL9</i>         | -1.26               | 7.71   | -5.20   | 2.51x10 <sup>-06</sup> | 2.54x10 <sup>-04</sup> | 4.19    |
| <i>NME5</i>         | -1.26               | 4.71   | -7.17   | 1.24x10 <sup>-09</sup> | 3.48x10 <sup>-07</sup> | 11.65   |
| <i>STK39</i>        | -1.26               | 7.82   | -5.08   | 3.90x10 <sup>-06</sup> | 3.71x10 <sup>-04</sup> | 3.76    |
| <i>DHCR7</i>        | -1.27               | 6.31   | -7.62   | 2.09x10 <sup>-10</sup> | 7.25x10 <sup>-08</sup> | 13.41   |
| <i>LTBP1</i>        | -1.27               | 8.81   | -4.97   | 5.89x10 <sup>-06</sup> | 5.24x10 <sup>-04</sup> | 3.36    |
| <i>TCTEX1D2</i>     | -1.27               | 6.83   | -5.45   | 9.88x10 <sup>-07</sup> | 1.16x10 <sup>-04</sup> | 5.10    |
| <i>HK1</i>          | -1.27               | 10.38  | -8.00   | 4.59x10 <sup>-11</sup> | 1.98x10 <sup>-08</sup> | 14.90   |
| <i>DUSP2</i>        | -1.27               | 5.65   | -5.94   | 1.49x10 <sup>-07</sup> | 2.28x10 <sup>-05</sup> | 6.95    |
| <i>PAPSS2</i>       | -1.27               | 8.98   | -5.18   | 2.67x10 <sup>-06</sup> | 2.69x10 <sup>-04</sup> | 4.13    |
| <i>PRDM16</i>       | -1.27               | 4.15   | -10.95  | 5.28x10 <sup>-16</sup> | 9.39x10 <sup>-13</sup> | 26.14   |
| <i>EXT1</i>         | -1.27               | 7.08   | -5.83   | 2.30x10 <sup>-07</sup> | 3.32x10 <sup>-05</sup> | 6.52    |
| <i>SERPINB7</i>     | -1.27               | 4.20   | -6.72   | 7.08x10 <sup>-09</sup> | 1.61x10 <sup>-06</sup> | 9.94    |
| <i>MET</i>          | -1.28               | 5.95   | -8.08   | 3.32x10 <sup>-11</sup> | 1.48x10 <sup>-08</sup> | 15.22   |
| <i>NMT2</i>         | -1.28               | 5.25   | -6.21   | 5.30x10 <sup>-08</sup> | 9.34x10 <sup>-06</sup> | 7.96    |
| <i>PCDH19</i>       | -1.28               | 4.97   | -4.81   | 1.04x10 <sup>-05</sup> | 8.53x10 <sup>-04</sup> | 2.81    |
| <i>PTGES</i>        | -1.28               | 6.90   | -4.83   | 9.70x10 <sup>-06</sup> | 8.07x10 <sup>-04</sup> | 2.88    |
| <i>IRX3</i>         | -1.28               | 9.21   | -4.44   | 3.83x10 <sup>-05</sup> | 2.61x10 <sup>-03</sup> | 1.55    |
| <i>ACOX2</i>        | -1.28               | 5.56   | -7.18   | 1.16x10 <sup>-09</sup> | 3.29x10 <sup>-07</sup> | 11.72   |
| <i>DUSP14</i>       | -1.29               | 8.19   | -6.62   | 1.08x10 <sup>-08</sup> | 2.33x10 <sup>-06</sup> | 9.52    |
| <i>SELIL3</i>       | -1.29               | 5.15   | -6.64   | 9.88x10 <sup>-09</sup> | 2.14x10 <sup>-06</sup> | 9.61    |
| <i>MOXD1</i>        | -1.29               | 4.71   | -4.69   | 1.57x10 <sup>-05</sup> | 1.22x10 <sup>-03</sup> | 2.41    |
| <i>FAM171A1</i>     | -1.29               | 8.31   | -4.80   | 1.08x10 <sup>-05</sup> | 8.83x10 <sup>-04</sup> | 2.77    |
| <i>LINC00619</i>    | -1.29               | 3.54   | -7.55   | 2.75x10 <sup>-10</sup> | 9.13x10 <sup>-08</sup> | 13.14   |
| <i>STAM</i>         | -1.30               | 8.23   | -8.96   | 1.05x10 <sup>-12</sup> | 7.41x10 <sup>-10</sup> | 18.64   |
| <i>CNTNAP1</i>      | -1.30               | 6.43   | -6.08   | 8.80x10 <sup>-08</sup> | 1.45x10 <sup>-05</sup> | 7.46    |
| <i>ARSI</i>         | -1.30               | 5.41   | -6.31   | 3.61x10 <sup>-08</sup> | 6.64x10 <sup>-06</sup> | 8.34    |
| <i>SMAGP</i>        | -1.30               | 7.15   | -5.48   | 8.63x10 <sup>-07</sup> | 1.03x10 <sup>-04</sup> | 5.23    |
| <i>LOC101929398</i> | -1.30               | 4.92   | -7.57   | 2.48x10 <sup>-10</sup> | 8.34x10 <sup>-08</sup> | 13.24   |
| <i>SPOCD1</i>       | -1.31               | 6.84   | -4.01   | 1.70x10 <sup>-04</sup> | 9.35x10 <sup>-03</sup> | 0.12    |
| <i>BNC1</i>         | -1.31               | 3.78   | -13.28  | 1.31x10 <sup>-19</sup> | 6.45x10 <sup>-16</sup> | 34.32   |
| <i>HMGA1</i>        | -1.31               | 6.36   | -7.77   | 1.16x10 <sup>-10</sup> | 4.41x10 <sup>-08</sup> | 13.99   |
| <i>ZNF580</i>       | -1.32               | 7.16   | -7.60   | 2.24x10 <sup>-10</sup> | 7.67x10 <sup>-08</sup> | 13.34   |
| <i>PRKD1</i>        | -1.32               | 4.90   | -8.16   | 2.41x10 <sup>-11</sup> | 1.13x10 <sup>-08</sup> | 15.54   |
| <i>ODC1</i>         | -1.32               | 10.00  | -5.00   | 5.21x10 <sup>-06</sup> | 4.74x10 <sup>-04</sup> | 3.48    |
| <i>ZMAT3</i>        | -1.32               | 7.12   | -6.78   | 5.71x10 <sup>-09</sup> | 1.33x10 <sup>-06</sup> | 10.15   |
| <i>GAP43</i>        | -1.33               | 4.16   | -10.36  | 4.93x10 <sup>-15</sup> | 6.40x10 <sup>-12</sup> | 23.93   |
| <i>DRAM1</i>        | -1.33               | 7.74   | -4.39   | 4.55x10 <sup>-05</sup> | 3.03x10 <sup>-03</sup> | 1.38    |
| <i>UBASH3B</i>      | -1.33               | 4.60   | -12.91  | 4.70x10 <sup>-19</sup> | 1.99x10 <sup>-15</sup> | 33.06   |
| <i>FAM155A</i>      | -1.33               | 4.43   | -5.55   | 6.76x10 <sup>-07</sup> | 8.33x10 <sup>-05</sup> | 5.47    |

Table SII. Continued.

| Gene symbol      | log <sub>2</sub> FC | AveExp | t-score | P-value                | P <sup>adj</sup>       | B-value |
|------------------|---------------------|--------|---------|------------------------|------------------------|---------|
| <i>TNS1</i>      | -1.33               | 6.49   | -7.40   | 4.98x10 <sup>-10</sup> | 1.54x10 <sup>-07</sup> | 12.55   |
| <i>PTGER2</i>    | -1.34               | 4.82   | -5.29   | 1.76x10 <sup>-06</sup> | 1.89x10 <sup>-04</sup> | 4.53    |
| <i>ASL</i>       | -1.34               | 6.86   | -6.93   | 3.15x10 <sup>-09</sup> | 7.85x10 <sup>-07</sup> | 10.73   |
| <i>ANO10</i>     | -1.34               | 7.06   | -8.94   | 1.13x10 <sup>-12</sup> | 7.96x10 <sup>-10</sup> | 18.56   |
| <i>ENDOD1</i>    | -1.34               | 6.50   | -7.98   | 5.03x10 <sup>-11</sup> | 2.15x10 <sup>-08</sup> | 14.81   |
| <i>RPS6KA2</i>   | -1.34               | 6.57   | -7.96   | 5.42x10 <sup>-11</sup> | 2.30x10 <sup>-08</sup> | 14.74   |
| <i>TRIM16</i>    | -1.34               | 6.61   | -4.67   | 1.74x10 <sup>-05</sup> | 1.33x10 <sup>-03</sup> | 2.31    |
| <i>RBPMS</i>     | -1.35               | 5.31   | -7.13   | 1.42x10 <sup>-09</sup> | 3.91x10 <sup>-07</sup> | 11.52   |
| <i>BRD3OS</i>    | -1.35               | 6.51   | -5.89   | 1.79x10 <sup>-07</sup> | 2.66x10 <sup>-05</sup> | 6.77    |
| <i>LINC00565</i> | -1.35               | 4.58   | -10.42  | 3.85x10 <sup>-15</sup> | 5.07x10 <sup>-12</sup> | 24.18   |
| <i>F2RL1</i>     | -1.35               | 4.75   | -6.61   | 1.09x10 <sup>-08</sup> | 2.34x10 <sup>-06</sup> | 9.51    |
| <i>TRPC4</i>     | -1.35               | 4.51   | -7.07   | 1.81x10 <sup>-09</sup> | 4.85x10 <sup>-07</sup> | 11.28   |
| <i>FMN2</i>      | -1.35               | 4.37   | -12.17  | 6.45x10 <sup>-18</sup> | 1.85x10 <sup>-14</sup> | 30.49   |
| <i>DLX2</i>      | -1.36               | 5.05   | -7.93   | 5.98x10 <sup>-11</sup> | 2.48x10 <sup>-08</sup> | 14.64   |
| <i>SYNDIG1</i>   | -1.36               | 4.49   | -7.51   | 3.13x10 <sup>-10</sup> | 1.02x10 <sup>-07</sup> | 13.01   |
| <i>SORCS2</i>    | -1.36               | 5.52   | -5.53   | 7.16x10 <sup>-07</sup> | 8.77x10 <sup>-05</sup> | 5.41    |
| <i>PPP1R13L</i>  | -1.36               | 5.92   | -7.60   | 2.26x10 <sup>-10</sup> | 7.71x10 <sup>-08</sup> | 13.33   |
| <i>TRIP6</i>     | -1.36               | 8.53   | -6.15   | 6.77x10 <sup>-08</sup> | 1.16x10 <sup>-05</sup> | 7.72    |
| <i>UGDH</i>      | -1.37               | 9.18   | -8.48   | 7.02x10 <sup>-12</sup> | 3.83x10 <sup>-09</sup> | 16.76   |
| <i>MYOF</i>      | -1.37               | 7.80   | -5.45   | 9.58x10 <sup>-07</sup> | 1.12x10 <sup>-04</sup> | 5.13    |
| <i>AKRIC2</i>    | -1.37               | 6.02   | -4.58   | 2.33x10 <sup>-05</sup> | 1.70x10 <sup>-03</sup> | 2.03    |
| <i>CREB3</i>     | -1.37               | 8.31   | -8.60   | 4.25x10 <sup>-12</sup> | 2.52x10 <sup>-09</sup> | 17.26   |
| <i>DSEL</i>      | -1.38               | 5.40   | -4.89   | 7.81x10 <sup>-06</sup> | 6.70x10 <sup>-04</sup> | 3.09    |
| <i>FAM57A</i>    | -1.39               | 7.74   | -7.06   | 1.92x10 <sup>-09</sup> | 5.11x10 <sup>-07</sup> | 11.22   |
| <i>ALCAM</i>     | -1.39               | 7.24   | -5.42   | 1.09x10 <sup>-06</sup> | 1.25x10 <sup>-04</sup> | 5.00    |
| <i>FGF1</i>      | -1.39               | 4.66   | -10.82  | 8.58x10 <sup>-16</sup> | 1.44x10 <sup>-12</sup> | 25.66   |
| <i>LOXL3</i>     | -1.40               | 7.14   | -4.57   | 2.45x10 <sup>-05</sup> | 1.78x10 <sup>-03</sup> | 1.98    |
| <i>ZNF423</i>    | -1.40               | 7.07   | -4.80   | 1.08x10 <sup>-05</sup> | 8.78x10 <sup>-04</sup> | 2.78    |
| <i>TUFT1</i>     | -1.40               | 6.45   | -4.77   | 1.20x10 <sup>-05</sup> | 9.60x10 <sup>-04</sup> | 2.67    |
| <i>PHLDA2</i>    | -1.40               | 4.88   | -9.98   | 2.04x10 <sup>-14</sup> | 2.28x10 <sup>-11</sup> | 22.53   |
| <i>QSOX1</i>     | -1.40               | 6.26   | -11.15  | 2.58x10 <sup>-16</sup> | 4.92x10 <sup>-13</sup> | 26.85   |
| <i>CLIP4</i>     | -1.41               | 5.70   | -5.65   | 4.55x10 <sup>-07</sup> | 5.98x10 <sup>-05</sup> | 5.86    |
| <i>ERCC2</i>     | -1.41               | 6.66   | -10.88  | 6.95x10 <sup>-16</sup> | 1.21x10 <sup>-12</sup> | 25.87   |
| <i>LAMC1</i>     | -1.41               | 9.96   | -6.25   | 4.51x10 <sup>-08</sup> | 8.13x10 <sup>-06</sup> | 8.12    |
| <i>MICAL2</i>    | -1.41               | 6.71   | -5.38   | 1.26x10 <sup>-06</sup> | 1.41x10 <sup>-04</sup> | 4.86    |
| <i>TBC1D19</i>   | -1.42               | 6.99   | -5.82   | 2.41x10 <sup>-07</sup> | 3.45x10 <sup>-05</sup> | 6.48    |
| <i>MGAT4B</i>    | -1.43               | 7.81   | -7.11   | 1.57x10 <sup>-09</sup> | 4.29x10 <sup>-07</sup> | 11.42   |
| <i>CYB561A3</i>  | -1.43               | 7.61   | -7.58   | 2.38x10 <sup>-10</sup> | 8.05x10 <sup>-08</sup> | 13.28   |
| <i>AJUBA</i>     | -1.43               | 5.76   | -8.41   | 9.24x10 <sup>-12</sup> | 4.87x10 <sup>-09</sup> | 16.49   |
| <i>PRSS12</i>    | -1.43               | 3.82   | -10.61  | 1.90x10 <sup>-15</sup> | 2.82x10 <sup>-12</sup> | 24.87   |
| <i>GADD45A</i>   | -1.43               | 8.88   | -4.23   | 7.99x10 <sup>-05</sup> | 4.90x10 <sup>-03</sup> | 0.84    |
| <i>SRXN1</i>     | -1.43               | 8.69   | -9.11   | 5.78x10 <sup>-13</sup> | 4.42x10 <sup>-10</sup> | 19.23   |
| <i>GCNT1</i>     | -1.44               | 6.41   | -5.29   | 1.78x10 <sup>-06</sup> | 1.90x10 <sup>-04</sup> | 4.53    |
| <i>CDH6</i>      | -1.45               | 4.81   | -7.77   | 1.14x10 <sup>-10</sup> | 4.38x10 <sup>-08</sup> | 14.00   |
| <i>FBLIM1</i>    | -1.46               | 6.96   | -8.10   | 3.05x10 <sup>-11</sup> | 1.38x10 <sup>-08</sup> | 15.31   |
| <i>PERP</i>      | -1.47               | 4.86   | -11.21  | 2.07x10 <sup>-16</sup> | 4.06x10 <sup>-13</sup> | 27.06   |
| <i>LINC01503</i> | -1.47               | 6.31   | -6.90   | 3.48x10 <sup>-09</sup> | 8.53x10 <sup>-07</sup> | 10.64   |
| <i>S100A16</i>   | -1.48               | 9.43   | -5.22   | 2.32x10 <sup>-06</sup> | 2.38x10 <sup>-04</sup> | 4.27    |
| <i>STXBP1</i>    | -1.48               | 7.92   | -5.41   | 1.13x10 <sup>-06</sup> | 1.29x10 <sup>-04</sup> | 4.97    |

Table SII. Continued.

| Gene symbol     | log <sub>2</sub> FC | AveExp | t-score | P-value                | P <sup>adj</sup>       | B-value |
|-----------------|---------------------|--------|---------|------------------------|------------------------|---------|
| <i>KIF1BP</i>   | -1.48               | 7.81   | -7.93   | 6.00x10 <sup>-11</sup> | 2.48x10 <sup>-08</sup> | 14.64   |
| <i>OLFML3</i>   | -1.48               | 10.38  | -4.62   | 2.07x10 <sup>-05</sup> | 1.55x10 <sup>-03</sup> | 2.14    |
| <i>CDC42EP3</i> | -1.49               | 8.53   | -5.58   | 6.06x10 <sup>-07</sup> | 7.61x10 <sup>-05</sup> | 5.58    |
| <i>TM4SF1</i>   | -1.50               | 6.24   | -6.94   | 3.03x10 <sup>-09</sup> | 7.62x10 <sup>-07</sup> | 10.77   |
| <i>OXTR</i>     | -1.51               | 5.35   | -4.10   | 1.23x10 <sup>-04</sup> | 7.14x10 <sup>-03</sup> | 0.43    |
| <i>AVEN</i>     | -1.51               | 7.30   | -7.55   | 2.67x10 <sup>-10</sup> | 8.91x10 <sup>-08</sup> | 13.17   |
| <i>FLNC</i>     | -1.51               | 7.72   | -5.08   | 3.89x10 <sup>-06</sup> | 3.71x10 <sup>-04</sup> | 3.76    |
| <i>SH3RF1</i>   | -1.52               | 6.92   | -10.25  | 7.41x10 <sup>-15</sup> | 9.12x10 <sup>-12</sup> | 23.53   |
| <i>CAVIN1</i>   | -1.52               | 8.64   | -5.46   | 9.32x10 <sup>-07</sup> | 1.10x10 <sup>-04</sup> | 5.16    |
| <i>SLC16A2</i>  | -1.53               | 5.89   | -6.74   | 6.56x10 <sup>-09</sup> | 1.50x10 <sup>-06</sup> | 10.01   |
| <i>ANKRD1</i>   | -1.53               | 4.00   | -5.37   | 1.32x10 <sup>-06</sup> | 1.46x10 <sup>-04</sup> | 4.82    |
| <i>TPM1</i>     | -1.54               | 8.49   | -8.20   | 2.09x10 <sup>-11</sup> | 9.99x10 <sup>-09</sup> | 15.68   |
| <i>ZYX</i>      | -1.54               | 8.09   | -5.85   | 2.14x10 <sup>-07</sup> | 3.12x10 <sup>-05</sup> | 6.59    |
| <i>MOK</i>      | -1.55               | 7.39   | -5.22   | 2.29x10 <sup>-06</sup> | 2.35x10 <sup>-04</sup> | 4.28    |
| <i>TCF7L1</i>   | -1.55               | 6.35   | -5.96   | 1.41x10 <sup>-07</sup> | 2.18x10 <sup>-05</sup> | 7.00    |
| <i>TPD52L1</i>  | -1.56               | 6.64   | -4.57   | 2.43x10 <sup>-05</sup> | 1.76x10 <sup>-03</sup> | 1.99    |
| <i>FNI</i>      | -1.56               | 10.29  | -5.90   | 1.74x10 <sup>-07</sup> | 2.60x10 <sup>-05</sup> | 6.80    |
| <i>CITED2</i>   | -1.56               | 6.46   | -8.17   | 2.33x10 <sup>-11</sup> | 1.10x10 <sup>-08</sup> | 15.57   |
| <i>MAFF</i>     | -1.56               | 7.23   | -6.56   | 1.34x10 <sup>-08</sup> | 2.76x10 <sup>-06</sup> | 9.31    |
| <i>EVA1C</i>    | -1.58               | 5.19   | -5.21   | 2.42x10 <sup>-06</sup> | 2.47x10 <sup>-04</sup> | 4.22    |
| <i>BAIAP2L1</i> | -1.58               | 5.50   | -6.03   | 1.06x10 <sup>-07</sup> | 1.71x10 <sup>-05</sup> | 7.28    |
| <i>PAMR1</i>    | -1.58               | 7.17   | -4.06   | 1.43x10 <sup>-04</sup> | 8.10x10 <sup>-03</sup> | 0.29    |
| <i>FGF5</i>     | -1.59               | 4.68   | -12.63  | 1.27x10 <sup>-18</sup> | 4.81x10 <sup>-15</sup> | 32.08   |
| <i>EHD2</i>     | -1.59               | 7.88   | -8.60   | 4.32x10 <sup>-12</sup> | 2.55x10 <sup>-09</sup> | 17.24   |
| <i>STK17A</i>   | -1.59               | 6.59   | -10.45  | 3.53x10 <sup>-15</sup> | 4.79x10 <sup>-12</sup> | 24.26   |
| <i>MVP</i>      | -1.60               | 7.81   | -5.60   | 5.60x10 <sup>-07</sup> | 7.13x10 <sup>-05</sup> | 5.65    |
| <i>B3GALT2</i>  | -1.60               | 3.52   | -8.50   | 6.51x10 <sup>-12</sup> | 3.59x10 <sup>-09</sup> | 16.83   |
| <i>MRAP2</i>    | -1.60               | 4.91   | -7.22   | 1.02x10 <sup>-09</sup> | 2.95x10 <sup>-07</sup> | 11.85   |
| <i>FAM46B</i>   | -1.60               | 5.34   | -10.79  | 9.86x10 <sup>-16</sup> | 1.63x10 <sup>-12</sup> | 25.52   |
| <i>MGST1</i>    | -1.61               | 6.16   | -5.43   | 1.04x10 <sup>-06</sup> | 1.20x10 <sup>-04</sup> | 5.05    |
| <i>NFASC</i>    | -1.61               | 4.50   | -19.51  | 8.09x10 <sup>-28</sup> | 2.45x10 <sup>-23</sup> | 52.74   |
| <i>NACC2</i>    | -1.62               | 6.19   | -10.56  | 2.31x10 <sup>-15</sup> | 3.32x10 <sup>-12</sup> | 24.68   |
| <i>SMURF2</i>   | -1.62               | 7.35   | -9.19   | 4.37x10 <sup>-13</sup> | 3.48x10 <sup>-10</sup> | 19.50   |
| <i>ADAMTS2</i>  | -1.63               | 7.38   | -6.24   | 4.75x10 <sup>-08</sup> | 8.47x10 <sup>-06</sup> | 8.07    |
| <i>ALDH1B1</i>  | -1.63               | 5.95   | -7.77   | 1.14x10 <sup>-10</sup> | 4.37x10 <sup>-08</sup> | 14.01   |
| <i>LMOD1</i>    | -1.63               | 5.41   | -7.64   | 1.92x10 <sup>-10</sup> | 6.73x10 <sup>-08</sup> | 13.49   |
| <i>EFEMP2</i>   | -1.64               | 9.05   | -7.39   | 5.05x10 <sup>-10</sup> | 1.56x10 <sup>-07</sup> | 12.54   |
| <i>AOX1</i>     | -1.64               | 5.01   | -6.30   | 3.73x10 <sup>-08</sup> | 6.82x10 <sup>-06</sup> | 8.31    |
| <i>NEXN</i>     | -1.64               | 7.72   | -4.28   | 6.72x10 <sup>-05</sup> | 4.23x10 <sup>-03</sup> | 1.01    |
| <i>SERPINE2</i> | -1.65               | 7.82   | -7.99   | 4.84x10 <sup>-11</sup> | 2.08x10 <sup>-08</sup> | 14.85   |
| <i>POPDC3</i>   | -1.65               | 6.42   | -4.49   | 3.30x10 <sup>-05</sup> | 2.30x10 <sup>-03</sup> | 1.69    |
| <i>PDE1C</i>    | -1.65               | 4.38   | -16.08  | 1.55x10 <sup>-23</sup> | 1.94x10 <sup>-19</sup> | 43.18   |
| <i>DACT1</i>    | -1.65               | 7.73   | -4.76   | 1.25x10 <sup>-05</sup> | 9.96x10 <sup>-04</sup> | 2.63    |
| <i>WNT5B</i>    | -1.66               | 5.29   | -9.71   | 5.70x10 <sup>-14</sup> | 5.89x10 <sup>-11</sup> | 21.51   |
| <i>CDK7</i>     | -1.66               | 7.69   | -9.07   | 6.81x10 <sup>-13</sup> | 5.09x10 <sup>-10</sup> | 19.06   |
| <i>ARMCX2</i>   | -1.66               | 9.10   | -4.72   | 1.44x10 <sup>-05</sup> | 1.13x10 <sup>-03</sup> | 2.49    |
| <i>FADS3</i>    | -1.69               | 7.05   | -8.52   | 5.96x10 <sup>-12</sup> | 3.37x10 <sup>-09</sup> | 16.92   |



Table SII. Continued.

| Gene symbol      | log <sub>2</sub> FC | AveExp | t-score | P-value                | P <sup>adj</sup>       | B-value |
|------------------|---------------------|--------|---------|------------------------|------------------------|---------|
| <i>AKAP12</i>    | -1.69               | 5.88   | -7.65   | 1.83x10 <sup>-10</sup> | 6.44x10 <sup>-08</sup> | 13.54   |
| <i>FBN1</i>      | -1.69               | 8.89   | -4.79   | 1.11x10 <sup>-05</sup> | 9.00x10 <sup>-04</sup> | 2.75    |
| <i>MXRA7</i>     | -1.70               | 7.83   | -10.16  | 1.04x10 <sup>-14</sup> | 1.24x10 <sup>-11</sup> | 23.20   |
| <i>CNN2</i>      | -1.71               | 8.33   | -9.34   | 2.43x10 <sup>-13</sup> | 2.05x10 <sup>-10</sup> | 20.08   |
| <i>CPA4</i>      | -1.71               | 5.75   | -12.79  | 7.14x10 <sup>-19</sup> | 2.91x10 <sup>-15</sup> | 32.65   |
| <i>BMPER</i>     | -1.71               | 3.82   | -8.56   | 5.07x10 <sup>-12</sup> | 2.97x10 <sup>-09</sup> | 17.08   |
| <i>MMP24OS</i>   | -1.73               | 7.35   | -11.29  | 1.52x10 <sup>-16</sup> | 3.04x10 <sup>-13</sup> | 27.37   |
| <i>NRG1</i>      | -1.73               | 4.62   | -19.89  | 2.96x10 <sup>-28</sup> | 1.25x10 <sup>-23</sup> | 53.71   |
| <i>INA</i>       | -1.75               | 5.37   | -7.23   | 9.74x10 <sup>-10</sup> | 2.84x10 <sup>-07</sup> | 11.89   |
| <i>XYLT1</i>     | -1.76               | 5.67   | -9.94   | 2.36x10 <sup>-14</sup> | 2.61x10 <sup>-11</sup> | 22.38   |
| <i>CORO2B</i>    | -1.77               | 5.25   | -5.71   | 3.57x10 <sup>-07</sup> | 4.84x10 <sup>-05</sup> | 6.09    |
| <i>ALDH1A3</i>   | -1.77               | 5.28   | -7.69   | 1.53x10 <sup>-10</sup> | 5.61x10 <sup>-08</sup> | 13.71   |
| <i>TGM2</i>      | -1.80               | 5.94   | -8.50   | 6.49x10 <sup>-12</sup> | 3.59x10 <sup>-09</sup> | 16.84   |
| <i>MBNL1-AS1</i> | -1.80               | 6.43   | -6.12   | 7.37x10 <sup>-08</sup> | 1.24x10 <sup>-05</sup> | 7.64    |
| <i>RRAS2</i>     | -1.81               | 7.47   | -7.17   | 1.23x10 <sup>-09</sup> | 3.46x10 <sup>-07</sup> | 11.66   |
| <i>SUGCT</i>     | -1.81               | 6.90   | -5.08   | 3.90x10 <sup>-06</sup> | 3.71x10 <sup>-04</sup> | 3.76    |
| <i>BAALC</i>     | -1.81               | 6.02   | -5.23   | 2.20x10 <sup>-06</sup> | 2.27x10 <sup>-04</sup> | 4.32    |
| <i>CALHM5</i>    | -1.82               | 5.98   | -12.39  | 2.98x10 <sup>-18</sup> | 9.41x10 <sup>-15</sup> | 31.25   |
| <i>GNG12</i>     | -1.82               | 7.60   | -7.99   | 4.83x10 <sup>-11</sup> | 2.08x10 <sup>-08</sup> | 14.85   |
| <i>MRGPRF</i>    | -1.82               | 6.31   | -4.04   | 1.52x10 <sup>-04</sup> | 8.54x10 <sup>-03</sup> | 0.23    |
| <i>TGFB111</i>   | -1.83               | 9.35   | -6.81   | 5.01x10 <sup>-09</sup> | 1.18x10 <sup>-06</sup> | 10.28   |
| <i>FSTL3</i>     | -1.83               | 6.48   | -11.99  | 1.21x10 <sup>-17</sup> | 3.31x10 <sup>-14</sup> | 29.87   |
| <i>KCTD11</i>    | -1.84               | 5.77   | -11.94  | 1.44x10 <sup>-17</sup> | 3.85x10 <sup>-14</sup> | 29.70   |
| <i>ITGA3</i>     | -1.84               | 5.59   | -10.47  | 3.18x10 <sup>-15</sup> | 4.35x10 <sup>-12</sup> | 24.37   |
| <i>ANO3</i>      | -1.84               | 4.29   | -8.39   | 9.79x10 <sup>-12</sup> | 5.15x10 <sup>-09</sup> | 16.43   |
| <i>BST1</i>      | -1.84               | 5.22   | -8.98   | 9.76x10 <sup>-13</sup> | 6.94x10 <sup>-10</sup> | 18.71   |
| <i>TIMP3</i>     | -1.85               | 8.92   | -4.32   | 5.98x10 <sup>-05</sup> | 3.83x10 <sup>-03</sup> | 1.12    |
| <i>ARNT2</i>     | -1.85               | 5.01   | -9.49   | 1.33x10 <sup>-13</sup> | 1.18x10 <sup>-10</sup> | 20.68   |
| <i>PAPPA</i>     | -1.85               | 5.30   | -11.27  | 1.66x10 <sup>-16</sup> | 3.28x10 <sup>-13</sup> | 27.28   |
| <i>PLPP4</i>     | -1.85               | 6.37   | -4.59   | 2.29x10 <sup>-05</sup> | 1.67x10 <sup>-03</sup> | 2.05    |
| <i>AXL</i>       | -1.88               | 7.53   | -9.33   | 2.53x10 <sup>-13</sup> | 2.12x10 <sup>-10</sup> | 20.04   |
| <i>OSR1</i>      | -1.88               | 4.11   | -8.78   | 2.13x10 <sup>-12</sup> | 1.37x10 <sup>-09</sup> | 17.94   |
| <i>F2RL2</i>     | -1.88               | 3.89   | -9.71   | 5.87x10 <sup>-14</sup> | 5.97x10 <sup>-11</sup> | 21.49   |
| <i>KRT19</i>     | -1.88               | 4.34   | -11.33  | 1.30x10 <sup>-16</sup> | 2.76x10 <sup>-13</sup> | 27.52   |
| <i>FZD2</i>      | -1.89               | 6.02   | -10.59  | 2.08x10 <sup>-15</sup> | 3.06x10 <sup>-12</sup> | 24.78   |
| <i>GLIPR1</i>    | -1.90               | 8.50   | -6.57   | 1.31x10 <sup>-08</sup> | 2.72x10 <sup>-06</sup> | 9.33    |
| <i>NEGR1</i>     | -1.90               | 4.75   | -7.02   | 2.25x10 <sup>-09</sup> | 5.87x10 <sup>-07</sup> | 11.07   |
| <i>DCBLD2</i>    | -1.91               | 6.23   | -15.26  | 1.98x10 <sup>-22</sup> | 1.83x10 <sup>-18</sup> | 40.69   |
| <i>CXCL6</i>     | -1.92               | 3.68   | -6.60   | 1.16x10 <sup>-08</sup> | 2.45x10 <sup>-06</sup> | 9.46    |
| <i>FOXD1</i>     | -1.93               | 6.10   | -10.19  | 9.40x10 <sup>-15</sup> | 1.13x10 <sup>-11</sup> | 23.30   |
| <i>LIF</i>       | -1.93               | 5.89   | -7.87   | 7.78x10 <sup>-11</sup> | 3.12x10 <sup>-08</sup> | 14.38   |
| <i>CDKN1A</i>    | -1.93               | 9.41   | -7.79   | 1.04x10 <sup>-10</sup> | 3.98x10 <sup>-08</sup> | 14.10   |
| <i>RGMB</i>      | -1.94               | 5.67   | -9.52   | 1.19x10 <sup>-13</sup> | 1.09x10 <sup>-10</sup> | 20.78   |
| <i>TBC1D2</i>    | -1.96               | 5.74   | -9.71   | 5.76x10 <sup>-14</sup> | 5.92x10 <sup>-11</sup> | 21.50   |
| <i>RRAS</i>      | -1.96               | 7.43   | -8.23   | 1.84x10 <sup>-11</sup> | 8.88x10 <sup>-09</sup> | 15.81   |
| <i>C11orf87</i>  | -1.96               | 3.59   | -8.28   | 1.53x10 <sup>-11</sup> | 7.50x10 <sup>-09</sup> | 15.99   |
| <i>IER3</i>      | -1.96               | 9.28   | -5.97   | 1.36x10 <sup>-07</sup> | 2.11x10 <sup>-05</sup> | 7.04    |

Table SII. Continued.

| Gene symbol         | log <sub>2</sub> FC | AveExp | t-score | P-value                | P <sup>adj</sup>       | B-value |
|---------------------|---------------------|--------|---------|------------------------|------------------------|---------|
| <i>CAI2</i>         | -1.97               | 6.81   | -6.75   | 6.26x10 <sup>-09</sup> | 1.44x10 <sup>-06</sup> | 10.06   |
| <i>CAVI</i>         | -1.97               | 10.15  | -5.93   | 1.59x10 <sup>-07</sup> | 2.41x10 <sup>-05</sup> | 6.88    |
| <i>RNF182</i>       | -1.97               | 5.42   | -6.72   | 7.30x10 <sup>-09</sup> | 1.65x10 <sup>-06</sup> | 9.91    |
| <i>INHBA</i>        | -1.98               | 7.30   | -5.94   | 1.47x10 <sup>-07</sup> | 2.26x10 <sup>-05</sup> | 6.96    |
| <i>P3H2</i>         | -1.99               | 6.99   | -8.73   | 2.63x10 <sup>-12</sup> | 1.67x10 <sup>-09</sup> | 17.73   |
| <i>SCRNI</i>        | -2.02               | 7.35   | -6.55   | 1.38x10 <sup>-08</sup> | 2.82x10 <sup>-06</sup> | 9.28    |
| <i>SFRP1</i>        | -2.02               | 4.88   | -8.04   | 3.85x10 <sup>-11</sup> | 1.70x10 <sup>-08</sup> | 15.08   |
| <i>CCBE1</i>        | -2.03               | 5.18   | -10.82  | 8.56x10 <sup>-16</sup> | 1.44x10 <sup>-12</sup> | 25.66   |
| <i>PENK</i>         | -2.03               | 5.22   | -6.01   | 1.16x10 <sup>-07</sup> | 1.85x10 <sup>-05</sup> | 7.19    |
| <i>DDAH1</i>        | -2.03               | 6.27   | -16.54  | 3.83x10 <sup>-24</sup> | 5.40x10 <sup>-20</sup> | 44.54   |
| <i>TNFRSF10D</i>    | -2.03               | 5.50   | -10.66  | 1.59x10 <sup>-15</sup> | 2.38x10 <sup>-12</sup> | 25.05   |
| <i>FOSL1</i>        | -2.04               | 6.02   | -8.00   | 4.59x10 <sup>-11</sup> | 1.98x10 <sup>-08</sup> | 14.91   |
| <i>CRLF1</i>        | -2.04               | 5.59   | -9.70   | 6.12x10 <sup>-14</sup> | 6.17x10 <sup>-11</sup> | 21.44   |
| <i>SMIM3</i>        | -2.04               | 7.61   | -5.75   | 3.06x10 <sup>-07</sup> | 4.22x10 <sup>-05</sup> | 6.24    |
| <i>FANK1</i>        | -2.05               | 4.61   | -9.43   | 1.69x10 <sup>-13</sup> | 1.47x10 <sup>-10</sup> | 20.44   |
| <i>SLC1A1</i>       | -2.05               | 5.69   | -7.44   | 4.21x10 <sup>-10</sup> | 1.34x10 <sup>-07</sup> | 12.72   |
| <i>PLPP3</i>        | -2.07               | 9.12   | -5.83   | 2.32x10 <sup>-07</sup> | 3.34x10 <sup>-05</sup> | 6.51    |
| <i>FBLN5</i>        | -2.07               | 6.93   | -5.20   | 2.50x10 <sup>-06</sup> | 2.53x10 <sup>-04</sup> | 4.19    |
| <i>PAWR</i>         | -2.07               | 5.45   | -7.26   | 8.47x10 <sup>-10</sup> | 2.51x10 <sup>-07</sup> | 12.03   |
| <i>GDF5</i>         | -2.08               | 6.27   | -10.06  | 1.51x10 <sup>-14</sup> | 1.75x10 <sup>-11</sup> | 22.83   |
| <i>CSRP1</i>        | -2.09               | 10.02  | -7.66   | 1.75x10 <sup>-10</sup> | 6.23x10 <sup>-08</sup> | 13.58   |
| <i>MYADM</i>        | -2.10               | 8.82   | -10.26  | 7.19x10 <sup>-15</sup> | 8.90x10 <sup>-12</sup> | 23.56   |
| <i>MGARP</i>        | -2.11               | 4.46   | -7.80   | 9.94x10 <sup>-11</sup> | 3.86x10 <sup>-08</sup> | 14.14   |
| <i>KRT18</i>        | -2.11               | 6.90   | -5.37   | 1.33x10 <sup>-06</sup> | 1.47x10 <sup>-04</sup> | 4.81    |
| <i>DCBLD1</i>       | -2.11               | 6.47   | -13.82  | 2.16x10 <sup>-20</sup> | 1.24x10 <sup>-16</sup> | 36.09   |
| <i>SEMA3C</i>       | -2.13               | 6.22   | -4.38   | 4.75x10 <sup>-05</sup> | 3.15x10 <sup>-03</sup> | 1.34    |
| <i>LOXL1</i>        | -2.13               | 8.88   | -4.06   | 1.41x10 <sup>-04</sup> | 7.98x10 <sup>-03</sup> | 0.30    |
| <i>GATA6</i>        | -2.13               | 4.63   | -10.54  | 2.49x10 <sup>-15</sup> | 3.51x10 <sup>-12</sup> | 24.61   |
| <i>MAMLD1</i>       | -2.13               | 5.86   | -9.14   | 5.17x10 <sup>-13</sup> | 4.01x10 <sup>-10</sup> | 19.34   |
| <i>PPP1R14A</i>     | -2.17               | 5.18   | -4.75   | 1.31x10 <sup>-05</sup> | 1.04x10 <sup>-03</sup> | 2.59    |
| <i>WISP3</i>        | -2.17               | 4.01   | -9.67   | 6.76x10 <sup>-14</sup> | 6.69x10 <sup>-11</sup> | 21.35   |
| <i>PFKP</i>         | -2.19               | 8.99   | -6.93   | 3.13x10 <sup>-09</sup> | 7.80x10 <sup>-07</sup> | 10.74   |
| <i>LOXL1-AS1</i>    | -2.19               | 4.81   | -8.56   | 5.11x10 <sup>-12</sup> | 2.98x10 <sup>-09</sup> | 17.07   |
| <i>LOC100288911</i> | -2.19               | 5.45   | -12.48  | 2.16x10 <sup>-18</sup> | 7.15x10 <sup>-15</sup> | 31.56   |
| <i>SCUBE3</i>       | -2.20               | 5.77   | -11.62  | 4.67x10 <sup>-17</sup> | 1.15x10 <sup>-13</sup> | 28.53   |
| <i>PXDN</i>         | -2.22               | 8.42   | -6.05   | 9.95x10 <sup>-08</sup> | 1.61x10 <sup>-05</sup> | 7.34    |
| <i>ARSJ</i>         | -2.24               | 6.05   | -8.34   | 1.18x10 <sup>-11</sup> | 6.02x10 <sup>-09</sup> | 16.25   |
| <i>TNFRSF12A</i>    | -2.25               | 8.19   | -8.62   | 3.95x10 <sup>-12</sup> | 2.37x10 <sup>-09</sup> | 17.33   |
| <i>NTM</i>          | -2.25               | 5.83   | -8.66   | 3.40x10 <sup>-12</sup> | 2.08x10 <sup>-09</sup> | 17.48   |
| <i>LOC728392</i>    | -2.26               | 6.99   | -7.40   | 4.89x10 <sup>-10</sup> | 1.52x10 <sup>-07</sup> | 12.57   |
| <i>MIR31HG</i>      | -2.26               | 5.80   | -9.07   | 6.83x10 <sup>-13</sup> | 5.09x10 <sup>-10</sup> | 19.06   |
| <i>PEAR1</i>        | -2.27               | 5.84   | -11.40  | 1.02x10 <sup>-16</sup> | 2.26x10 <sup>-13</sup> | 27.76   |
| <i>HACD1</i>        | -2.29               | 5.54   | -9.96   | 2.26x10 <sup>-14</sup> | 2.52x10 <sup>-11</sup> | 22.43   |
| <i>LOX</i>          | -2.29               | 8.75   | -4.99   | 5.30x10 <sup>-06</sup> | 4.80x10 <sup>-04</sup> | 3.46    |
| <i>LDOC1</i>        | -2.30               | 7.97   | -6.58   | 1.25x10 <sup>-08</sup> | 2.61x10 <sup>-06</sup> | 9.38    |
| <i>IGFBP4</i>       | -2.30               | 9.91   | -6.19   | 5.61x10 <sup>-08</sup> | 9.82x10 <sup>-06</sup> | 7.90    |
| <i>SPOCK1</i>       | -2.31               | 7.99   | -4.48   | 3.33x10 <sup>-05</sup> | 2.32x10 <sup>-03</sup> | 1.68    |
| <i>NDN</i>          | -2.31               | 7.35   | -5.59   | 5.74x10 <sup>-07</sup> | 7.26x10 <sup>-05</sup> | 5.63    |
| <i>4-Mar</i>        | -2.32               | 5.08   | -22.16  | 9.13x10 <sup>-31</sup> | 4.83x10 <sup>-26</sup> | 59.24   |

Table SII. Continued.

| Gene symbol      | log <sub>2</sub> FC | AveExp | t-score | P-value                | P <sup>adj</sup>       | B-value |
|------------------|---------------------|--------|---------|------------------------|------------------------|---------|
| <i>LINC01119</i> | -2.32               | 5.34   | -9.14   | 5.27x10 <sup>-13</sup> | 4.07x10 <sup>-10</sup> | 19.32   |
| <i>G6PD</i>      | -2.32               | 6.66   | -11.14  | 2.71x10 <sup>-16</sup> | 5.07x10 <sup>-13</sup> | 26.80   |
| <i>IGFBP6</i>    | -2.33               | 8.27   | -6.49   | 1.76x10 <sup>-08</sup> | 3.51x10 <sup>-06</sup> | 9.04    |
| <i>FLG</i>       | -2.33               | 3.72   | -7.03   | 2.10x10 <sup>-09</sup> | 5.55x10 <sup>-07</sup> | 11.14   |
| <i>RPS11</i>     | -2.33               | 7.20   | -6.80   | 5.16x10 <sup>-09</sup> | 1.21x10 <sup>-06</sup> | 10.25   |
| <i>AMOTL2</i>    | -2.34               | 8.15   | -9.13   | 5.43x10 <sup>-13</sup> | 4.18x10 <sup>-10</sup> | 19.29   |
| <i>PLAT</i>      | -2.34               | 6.58   | -5.52   | 7.40x10 <sup>-07</sup> | 9.03x10 <sup>-05</sup> | 5.38    |
| <i>SERPINB2</i>  | -2.36               | 4.27   | -7.93   | 6.04x10 <sup>-11</sup> | 2.49x10 <sup>-08</sup> | 14.63   |
| <i>ALPK2</i>     | -2.37               | 5.27   | -11.45  | 8.61x10 <sup>-17</sup> | 1.98x10 <sup>-13</sup> | 27.93   |
| <i>BDKRB1</i>    | -2.38               | 4.82   | -14.26  | 5.00x10 <sup>-21</sup> | 3.41x10 <sup>-17</sup> | 37.53   |
| <i>EVA1A</i>     | -2.38               | 6.52   | -8.55   | 5.22x10 <sup>-12</sup> | 3.02x10 <sup>-09</sup> | 17.05   |
| <i>C12orf75</i>  | -2.40               | 8.54   | -6.40   | 2.48x10 <sup>-08</sup> | 4.79x10 <sup>-06</sup> | 8.71    |
| <i>LYPD6B</i>    | -2.40               | 4.98   | -10.93  | 5.79x10 <sup>-16</sup> | 1.02x10 <sup>-12</sup> | 26.05   |
| <i>LYPD1</i>     | -2.41               | 5.63   | -5.29   | 1.76x10 <sup>-06</sup> | 1.89x10 <sup>-04</sup> | 4.54    |
| <i>KCNE4</i>     | -2.41               | 5.66   | -9.35   | 2.31x10 <sup>-13</sup> | 1.97x10 <sup>-10</sup> | 20.13   |
| <i>MIF-AS1</i>   | -2.42               | 4.98   | -10.43  | 3.73x10 <sup>-15</sup> | 4.97x10 <sup>-12</sup> | 24.21   |
| <i>KCNK2</i>     | -2.44               | 5.30   | -8.85   | 1.61x10 <sup>-12</sup> | 1.07x10 <sup>-09</sup> | 18.21   |
| <i>CNN1</i>      | -2.48               | 6.29   | -5.48   | 8.72x10 <sup>-07</sup> | 1.04x10 <sup>-04</sup> | 5.22    |
| <i>CYR61</i>     | -2.48               | 9.82   | -6.15   | 6.67x10 <sup>-08</sup> | 1.14x10 <sup>-05</sup> | 7.74    |
| <i>SLC14A1</i>   | -2.48               | 4.16   | -8.11   | 3.00x10 <sup>-11</sup> | 1.36x10 <sup>-08</sup> | 15.33   |
| <i>LURAP1L</i>   | -2.50               | 6.02   | -7.70   | 1.48x10 <sup>-10</sup> | 5.44x10 <sup>-08</sup> | 13.75   |
| <i>NT5E</i>      | -2.50               | 6.37   | -9.56   | 1.02x10 <sup>-13</sup> | 9.39x10 <sup>-11</sup> | 20.94   |
| <i>COL8A1</i>    | -2.52               | 5.70   | -9.64   | 7.61x10 <sup>-14</sup> | 7.29x10 <sup>-11</sup> | 21.23   |
| <i>CHI3L1</i>    | -2.53               | 5.33   | -5.94   | 1.50x10 <sup>-07</sup> | 2.29x10 <sup>-05</sup> | 6.94    |
| <i>FGF7P3</i>    | -2.54               | 5.49   | -10.44  | 3.57x10 <sup>-15</sup> | 4.81x10 <sup>-12</sup> | 24.25   |
| <i>WNT5A</i>     | -2.54               | 7.87   | -6.51   | 1.61x10 <sup>-08</sup> | 3.24x10 <sup>-06</sup> | 9.13    |
| <i>PRR16</i>     | -2.54               | 6.01   | -8.07   | 3.50x10 <sup>-11</sup> | 1.55x10 <sup>-08</sup> | 15.17   |
| <i>SHISAL1</i>   | -2.56               | 6.08   | -10.26  | 7.00x10 <sup>-15</sup> | 8.72x10 <sup>-12</sup> | 23.59   |
| <i>CYP1B1</i>    | -2.57               | 7.66   | -5.86   | 2.08x10 <sup>-07</sup> | 3.04x10 <sup>-05</sup> | 6.62    |
| <i>CAP2</i>      | -2.58               | 6.58   | -6.23   | 4.92x10 <sup>-08</sup> | 8.75x10 <sup>-06</sup> | 8.03    |
| <i>IGFBP3</i>    | -2.61               | 9.97   | -7.47   | 3.76x10 <sup>-10</sup> | 1.21x10 <sup>-07</sup> | 12.83   |
| <i>CEMP</i>      | -2.62               | 6.96   | -8.27   | 1.58x10 <sup>-11</sup> | 7.73x10 <sup>-09</sup> | 15.95   |
| <i>FZD7</i>      | -2.62               | 7.69   | -7.64   | 1.94x10 <sup>-10</sup> | 6.75x10 <sup>-08</sup> | 13.48   |
| <i>CRIMI</i>     | -2.65               | 7.88   | -11.59  | 5.08x10 <sup>-17</sup> | 1.22x10 <sup>-13</sup> | 28.45   |
| <i>MIR100HG</i>  | -2.65               | 7.42   | -5.58   | 5.88x10 <sup>-07</sup> | 7.43x10 <sup>-05</sup> | 5.60    |
| <i>CCDC80</i>    | -2.66               | 7.90   | -9.92   | 2.64x10 <sup>-14</sup> | 2.86x10 <sup>-11</sup> | 22.28   |
| <i>NTN4</i>      | -2.70               | 6.08   | -5.81   | 2.48x10 <sup>-07</sup> | 3.54x10 <sup>-05</sup> | 6.45    |
| <i>ADAMTS1</i>   | -2.70               | 7.81   | -7.20   | 1.07x10 <sup>-09</sup> | 3.10x10 <sup>-07</sup> | 11.79   |
| <i>THBS1</i>     | -2.71               | 6.68   | -8.91   | 1.30x10 <sup>-12</sup> | 8.94x10 <sup>-10</sup> | 18.43   |
| <i>EFEMP1</i>    | -2.73               | 6.28   | -6.89   | 3.67x10 <sup>-09</sup> | 8.98x10 <sup>-07</sup> | 10.58   |
| <i>BDNF</i>      | -2.77               | 5.69   | -8.84   | 1.70x10 <sup>-12</sup> | 1.13x10 <sup>-09</sup> | 18.16   |
| <i>GREM1</i>     | -2.78               | 7.33   | -4.66   | 1.75x10 <sup>-05</sup> | 1.34x10 <sup>-03</sup> | 2.30    |
| <i>BOK</i>       | -2.78               | 6.28   | -12.61  | 1.36x10 <sup>-18</sup> | 5.04x10 <sup>-15</sup> | 32.02   |
| <i>WASF3</i>     | -2.78               | 6.66   | -7.86   | 8.12x10 <sup>-11</sup> | 3.23x10 <sup>-08</sup> | 14.34   |
| <i>AHRR</i>      | -2.81               | 5.24   | -7.74   | 1.27x10 <sup>-10</sup> | 4.75x10 <sup>-08</sup> | 13.90   |
| <i>RAB3B</i>     | -2.84               | 4.66   | -19.69  | 5.05x10 <sup>-28</sup> | 1.78x10 <sup>-23</sup> | 53.20   |
| <i>CLDN11</i>    | -2.89               | 6.13   | -8.52   | 5.88x10 <sup>-12</sup> | 3.34x10 <sup>-09</sup> | 16.93   |
| <i>C5orf30</i>   | -2.89               | 6.66   | -12.33  | 3.62x10 <sup>-18</sup> | 1.08x10 <sup>-14</sup> | 31.05   |
| <i>CCND1</i>     | -2.93               | 7.69   | -9.06   | 7.23x10 <sup>-13</sup> | 5.35x10 <sup>-10</sup> | 19.00   |

Table SII. Continued.

| Gene symbol      | log <sub>2</sub> FC | AveExp | t-score | P-value                | P <sup>adj</sup>       | B-value |
|------------------|---------------------|--------|---------|------------------------|------------------------|---------|
| <i>TNFRSF11B</i> | -2.95               | 5.74   | -7.29   | 7.46x10 <sup>-10</sup> | 2.25x10 <sup>-07</sup> | 12.15   |
| <i>MFAP5</i>     | -2.99               | 5.67   | -4.47   | 3.44x10 <sup>-05</sup> | 2.37x10 <sup>-03</sup> | 1.65    |
| <i>VEGFC</i>     | -2.99               | 8.16   | -10.21  | 8.72x10 <sup>-15</sup> | 1.06x10 <sup>-11</sup> | 23.37   |
| <i>CXCL12</i>    | -3.05               | 8.01   | -6.34   | 3.24x10 <sup>-08</sup> | 6.04x10 <sup>-06</sup> | 8.44    |
| <i>APCDD1L</i>   | -3.06               | 6.31   | -12.11  | 7.95x10 <sup>-18</sup> | 2.24x10 <sup>-14</sup> | 30.28   |
| <i>GREM2</i>     | -3.08               | 4.44   | -14.40  | 3.15x10 <sup>-21</sup> | 2.22x10 <sup>-17</sup> | 37.98   |
| <i>TAGLN</i>     | -3.10               | 9.01   | -7.36   | 5.75x10 <sup>-10</sup> | 1.76x10 <sup>-07</sup> | 12.41   |
| <i>TMEM200A</i>  | -3.14               | 7.73   | -6.83   | 4.66x10 <sup>-09</sup> | 1.11x10 <sup>-06</sup> | 10.35   |
| <i>IL6</i>       | -3.14               | 6.40   | -7.54   | 2.86x10 <sup>-10</sup> | 9.47x10 <sup>-08</sup> | 13.10   |
| <i>AMIGO2</i>    | -3.18               | 7.47   | -7.98   | 4.98x10 <sup>-11</sup> | 2.13x10 <sup>-08</sup> | 14.82   |
| <i>SYNC</i>      | -3.22               | 6.45   | -8.44   | 8.11x10 <sup>-12</sup> | 4.36x10 <sup>-09</sup> | 16.62   |
| <i>FST</i>       | -3.23               | 6.35   | -10.75  | 1.13x10 <sup>-15</sup> | 1.76x10 <sup>-12</sup> | 25.39   |
| <i>ENC1</i>      | -3.28               | 7.50   | -12.60  | 1.40x10 <sup>-18</sup> | 5.12x10 <sup>-15</sup> | 31.99   |
| <i>HAS2</i>      | -3.30               | 7.43   | -6.76   | 6.18x10 <sup>-09</sup> | 1.42x10 <sup>-06</sup> | 10.07   |
| <i>SERPINE1</i>  | -3.34               | 6.53   | -8.99   | 9.30x10 <sup>-13</sup> | 6.67x10 <sup>-10</sup> | 18.76   |
| <i>CTGF</i>      | -3.36               | 9.96   | -7.76   | 1.16x10 <sup>-10</sup> | 4.41x10 <sup>-08</sup> | 13.99   |
| <i>LINC01279</i> | -3.39               | 7.16   | -7.49   | 3.50x10 <sup>-10</sup> | 1.13x10 <sup>-07</sup> | 12.90   |
| <i>BEX1</i>      | -3.44               | 5.21   | -10.69  | 1.39x10 <sup>-15</sup> | 2.10x10 <sup>-12</sup> | 25.19   |
| <i>LINC00968</i> | -3.46               | 4.39   | -14.04  | 1.01x10 <sup>-20</sup> | 6.71x10 <sup>-17</sup> | 36.83   |
| <i>FHL2</i>      | -3.47               | 9.26   | -11.05  | 3.67x10 <sup>-16</sup> | 6.64x10 <sup>-13</sup> | 26.50   |
| <i>KRTAP1-1</i>  | -3.49               | 4.81   | -15.05  | 3.86x10 <sup>-22</sup> | 3.15x10 <sup>-18</sup> | 40.04   |
| <i>MEST</i>      | -3.49               | 8.68   | -5.58   | 6.05x10 <sup>-07</sup> | 7.60x10 <sup>-05</sup> | 5.58    |
| <i>NQO1</i>      | -3.59               | 7.59   | -11.32  | 1.40x10 <sup>-16</sup> | 2.84x10 <sup>-13</sup> | 27.45   |
| <i>ITGBL1</i>    | -3.65               | 6.73   | -9.92   | 2.63x10 <sup>-14</sup> | 2.86x10 <sup>-11</sup> | 22.28   |
| <i>FGF2</i>      | -3.65               | 4.76   | -23.93  | 1.39x10 <sup>-32</sup> | 1.47x10 <sup>-27</sup> | 63.21   |
| <i>HAS1</i>      | -3.79               | 5.74   | -10.87  | 7.17x10 <sup>-16</sup> | 1.23x10 <sup>-12</sup> | 25.84   |
| <i>GAS6</i>      | -3.86               | 8.30   | -12.45  | 2.34x10 <sup>-18</sup> | 7.52x10 <sup>-15</sup> | 31.48   |
| <i>VGLL3</i>     | -3.91               | 5.93   | -8.69   | 3.06x10 <sup>-12</sup> | 1.90x10 <sup>-09</sup> | 17.58   |
| <i>LTBP2</i>     | -3.99               | 7.91   | -12.64  | 1.20x10 <sup>-18</sup> | 4.67x10 <sup>-15</sup> | 32.14   |
| <i>DSP</i>       | -4.00               | 6.85   | -8.51   | 6.14x10 <sup>-12</sup> | 3.43x10 <sup>-09</sup> | 16.89   |
| <i>NPR3</i>      | -4.07               | 5.77   | -16.82  | 1.66x10 <sup>-24</sup> | 3.19x10 <sup>-20</sup> | 45.36   |
| <i>RGS4</i>      | -4.08               | 6.30   | -12.49  | 2.07x10 <sup>-18</sup> | 7.07x10 <sup>-15</sup> | 31.61   |
| <i>PTX3</i>      | -4.19               | 8.95   | -7.46   | 3.81x10 <sup>-10</sup> | 1.22x10 <sup>-07</sup> | 12.82   |
| <i>TFPI2</i>     | -4.23               | 5.06   | -11.62  | 4.55x10 <sup>-17</sup> | 1.13x10 <sup>-13</sup> | 28.56   |
| <i>STC2</i>      | -4.25               | 6.78   | -16.57  | 3.47x10 <sup>-24</sup> | 5.25x10 <sup>-20</sup> | 44.64   |
| <i>DKK1</i>      | -4.68               | 7.14   | -7.45   | 4.00x10 <sup>-10</sup> | 1.28x10 <sup>-07</sup> | 12.77   |
| <i>KRTAP1-5</i>  | -5.36               | 5.76   | -17.48  | 2.37x10 <sup>-25</sup> | 5.57x10 <sup>-21</sup> | 47.25   |

OS, osteosarcoma; log<sub>2</sub>FC, log<sub>2</sub>(fold change); AveExp, average expression across all samples; P<sup>adj</sup>, adjusted P-value; t-score, statistic value for t-test; B, negative B-statistic value.
